# Supplementary material
Source: PubMed Central journal article supplement (PMC2077830)

**A**

anti-trx

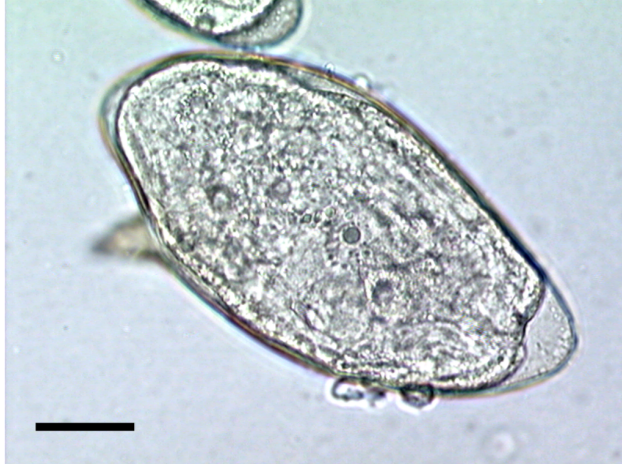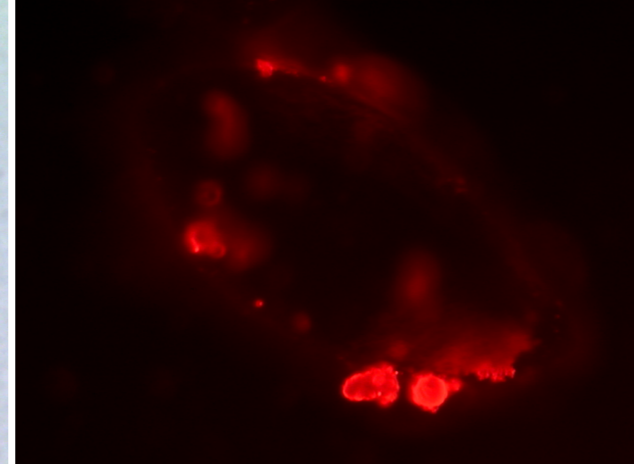

anti-HSP70

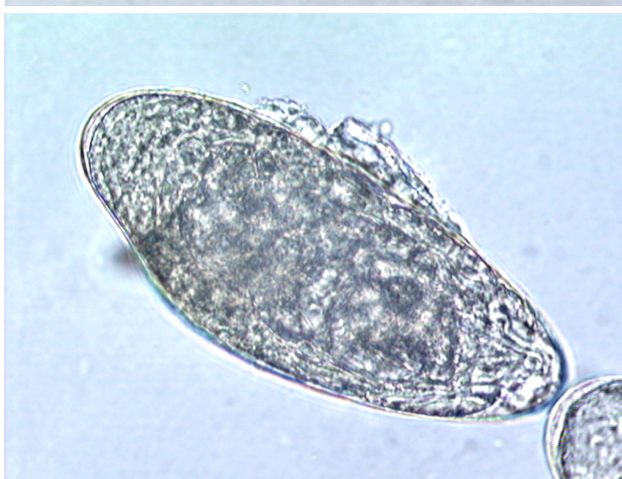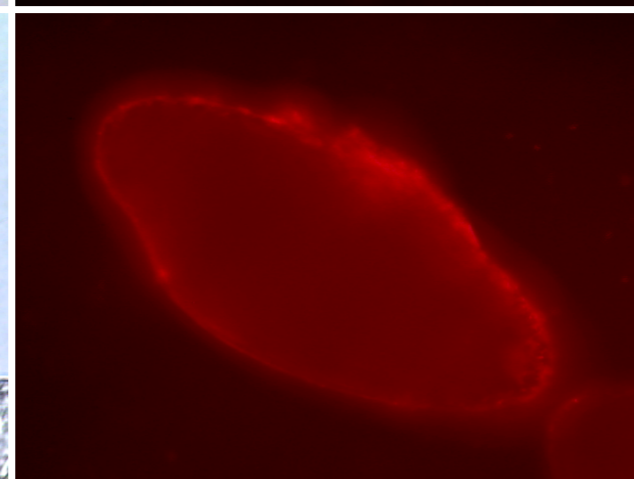

anti-Ub

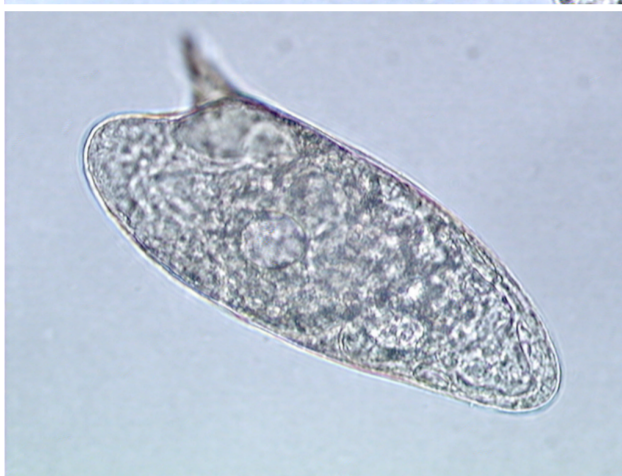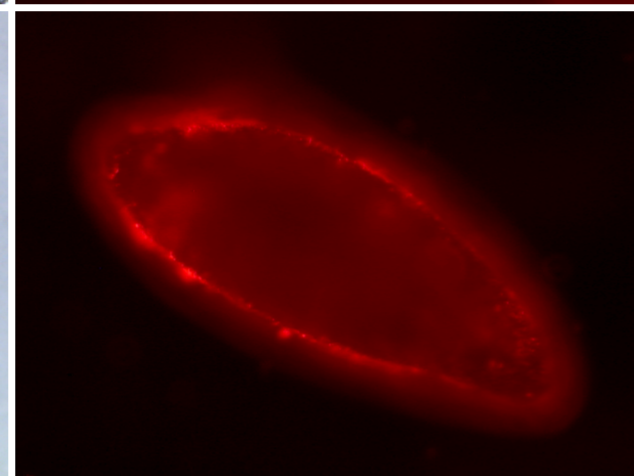

anti-PHM

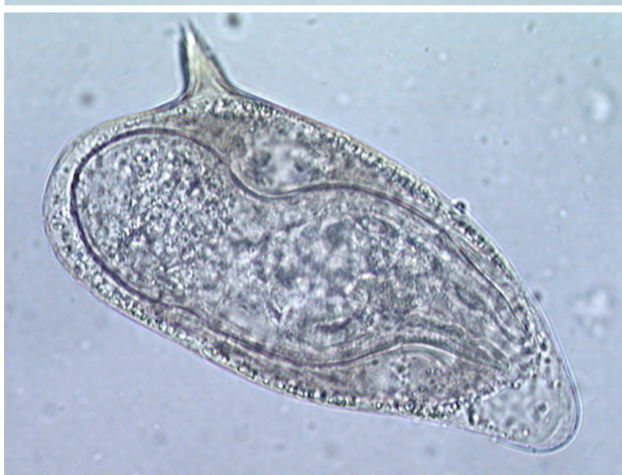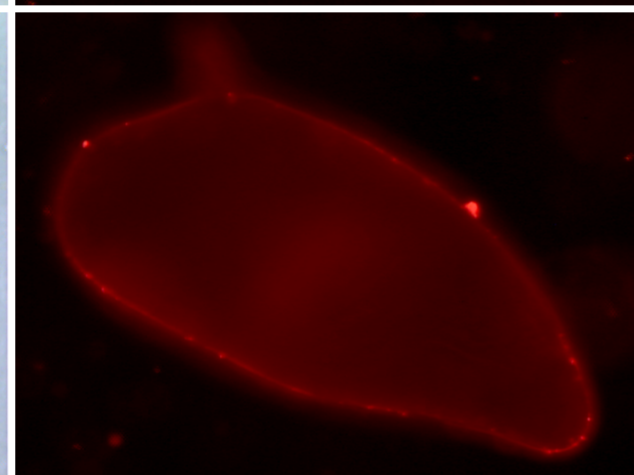

gar-AF555

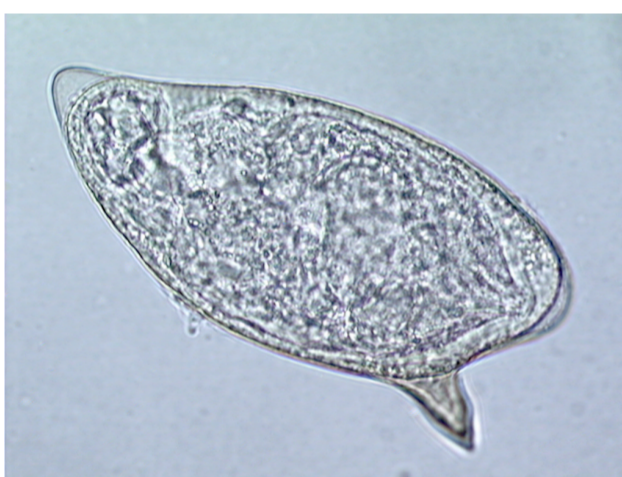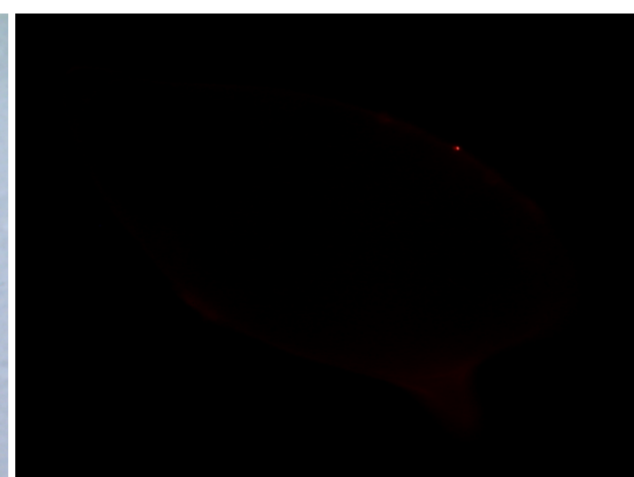

anti-tubulin

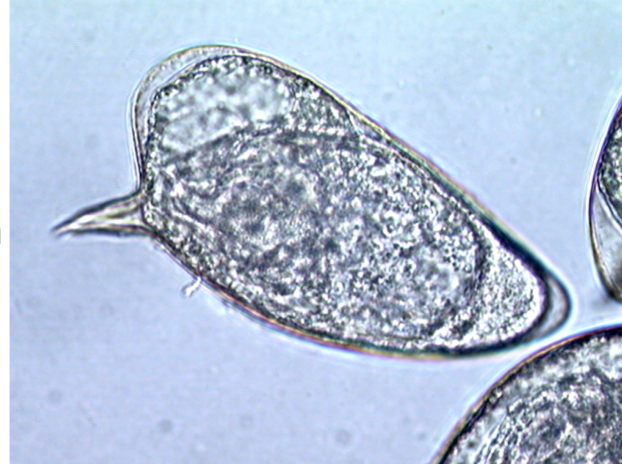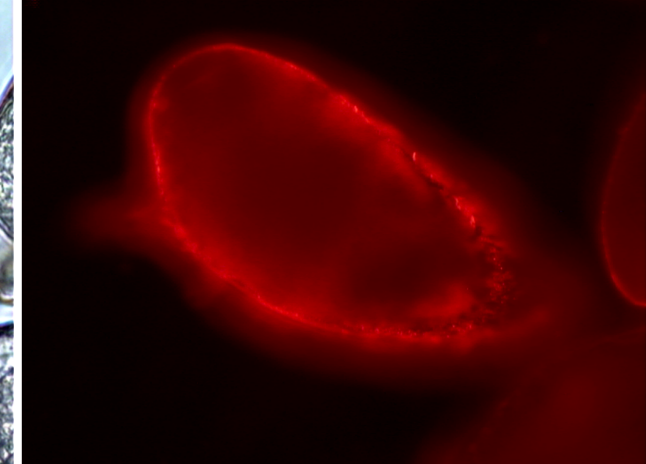

anti-albumin

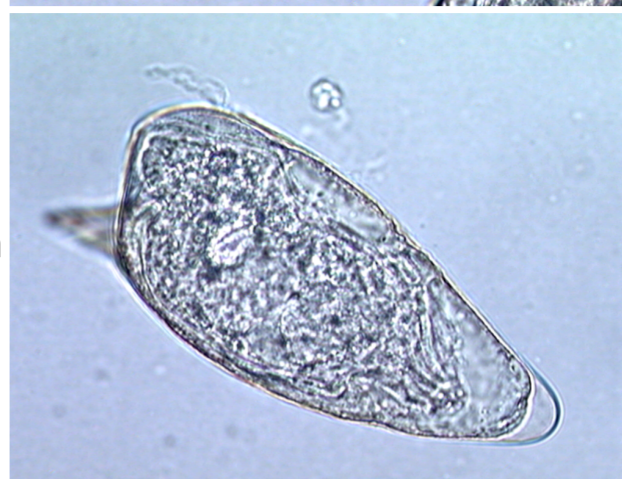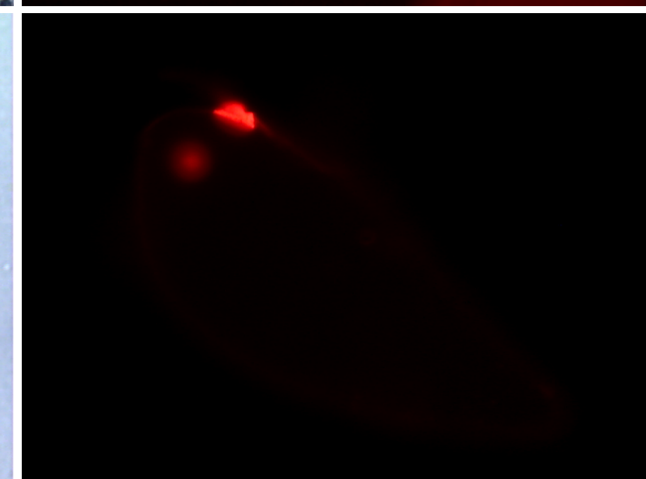

anti-TGR

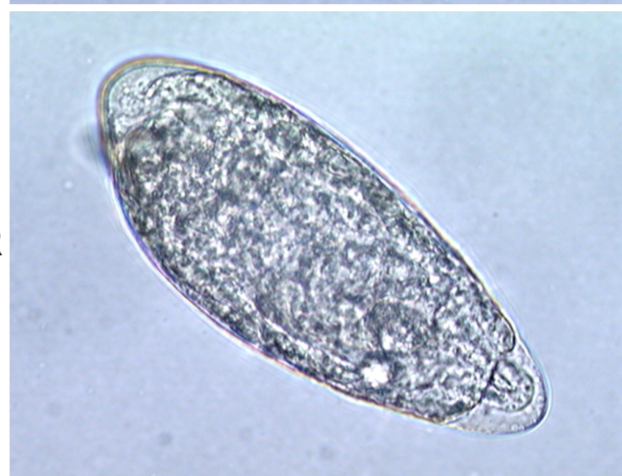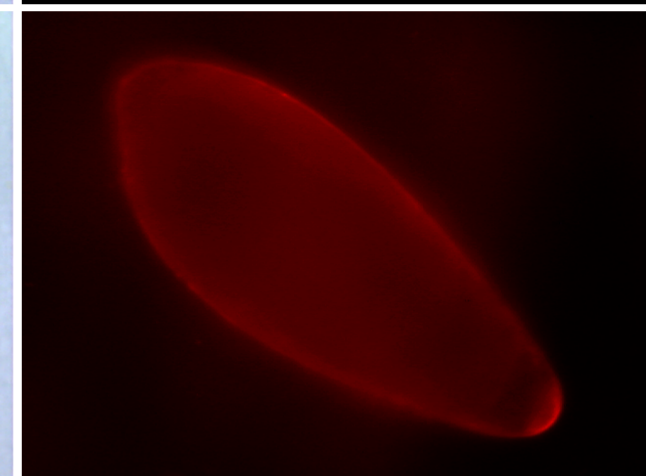

anti-rS6

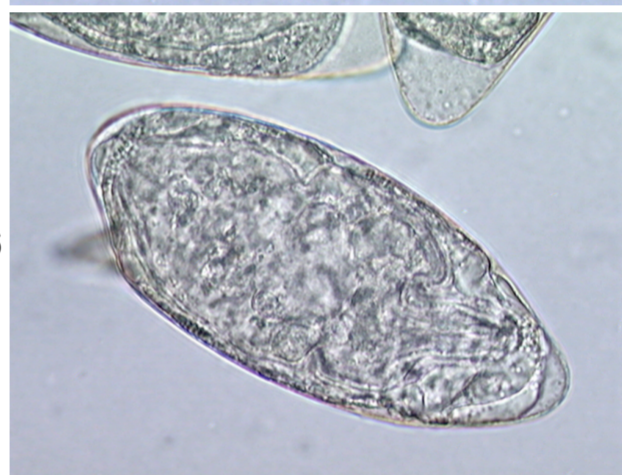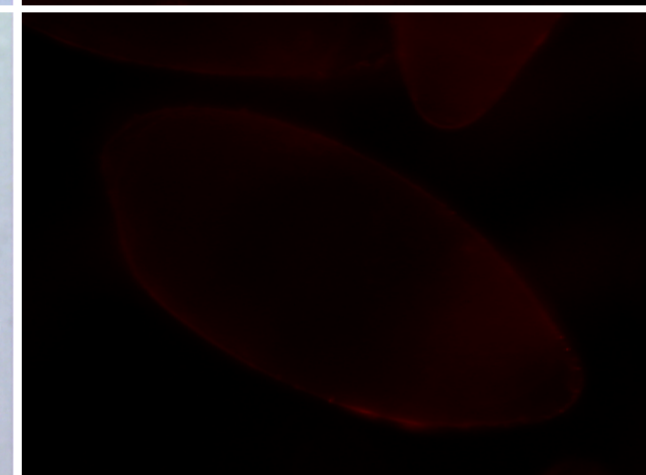**B**

anti-p40

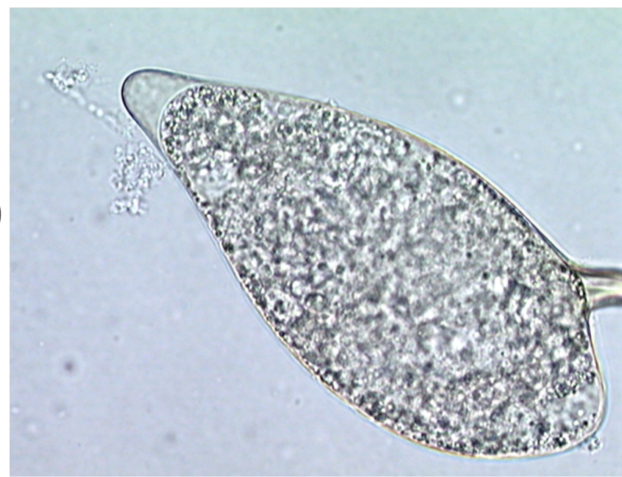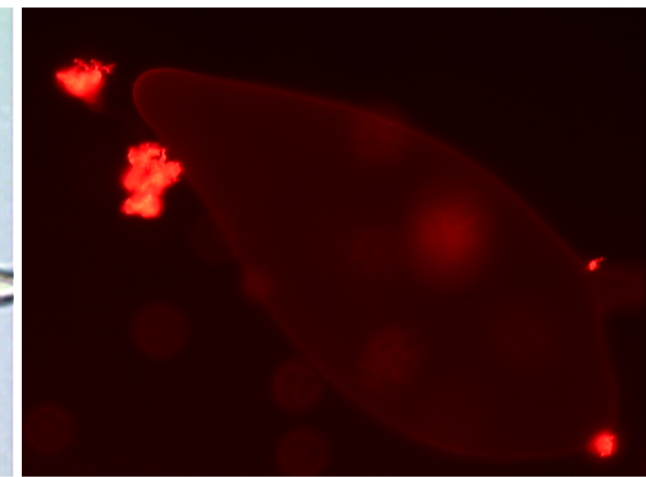

gam-AF555

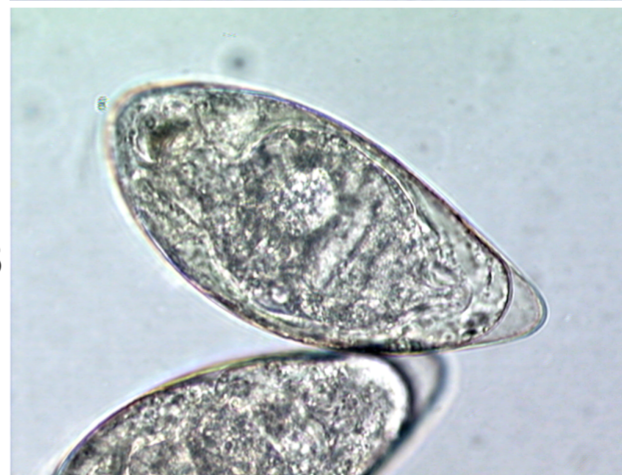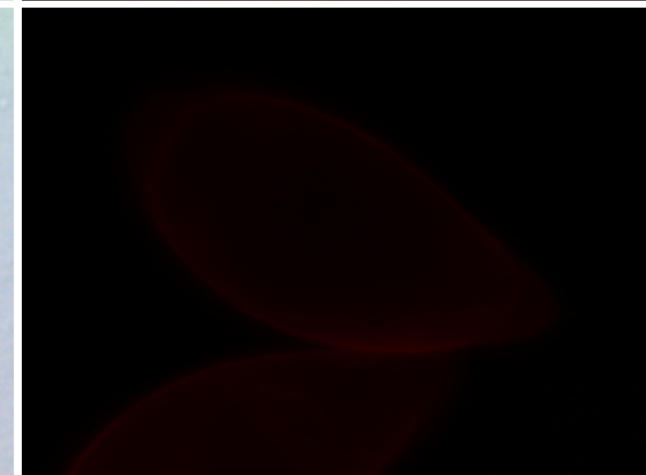

anti-GST-AF555

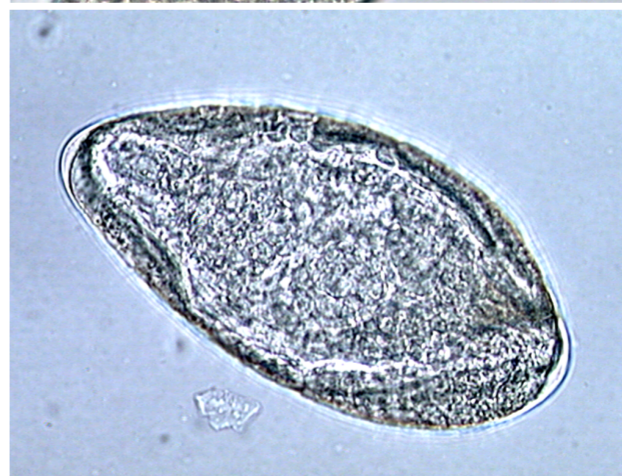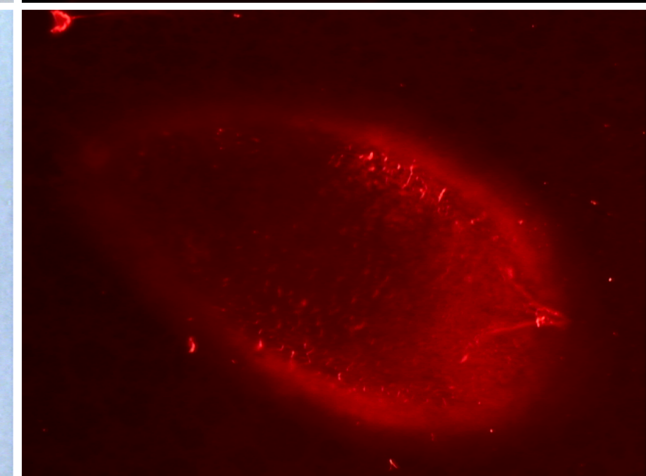

anti trx-AF555

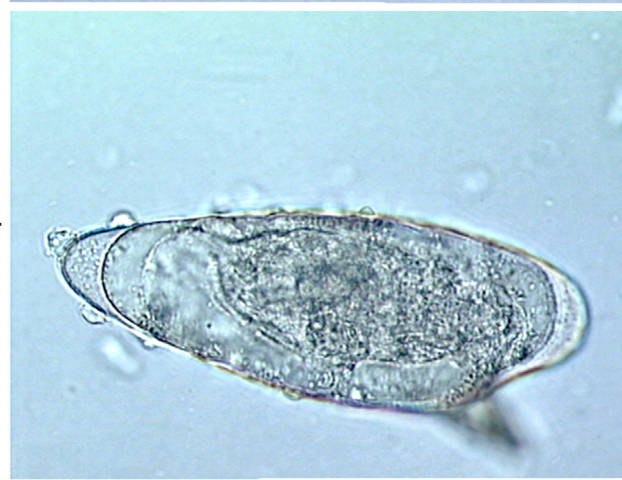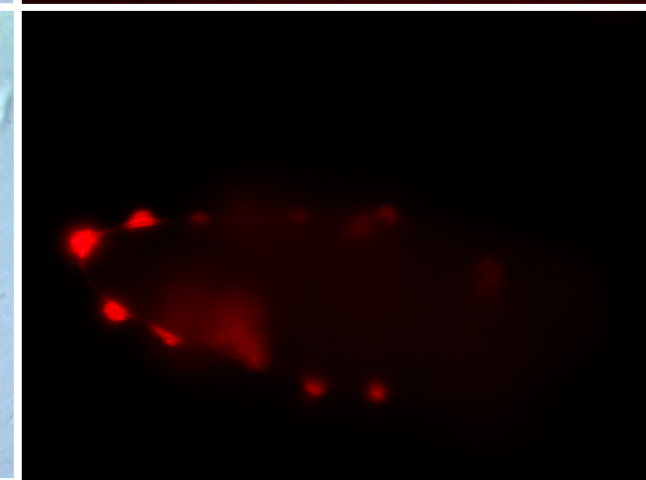

Supplement: NIHMS29946-supplement-03.pdf [file NIHMS29946-supplement-03.pdf]
