# Supplementary material
Source: PubMed Central journal article supplement (PMC2077830)
Supplement: NIHMS29946-supplement-02.pdf [file NIHMS29946-supplement-02.pdf]

DTASelect v2.0.2

/data/6/jrjohns1/s\_mansoni/SmEgg

/data/6/jrjohns1/s\_mansoni/harvard\_smgi/harvard\_SMGI\_50aa\_Hs\_contams\_reverse.fasta

SEQUEST 3.0 in SQT format.

-e Contaminant --DB

[Jump](#) to the summary table.

sequest.params modifications:

|        |   |      |
|--------|---|------|
| *      | X | 0.0  |
| #      | X | 0.0  |
| @      | X | 0.0  |
| Static | C | 57.0 |

|             |                                          |
|-------------|------------------------------------------|
| true        | Use criteria                             |
| 0.0         | Minimum peptide confidence               |
| 0.05        | Peptide false positive rate              |
| 0.0         | Minimum protein confidence               |
| 1.0         | Protein false positive rate              |
| 1           | Minimum charge state                     |
| 9           | Maximum charge state                     |
| 0.0         | Minimum ion proportion                   |
| 1000        | Maximum Sp rank                          |
| -1.0        | Minimum Sp score                         |
| Include     | Modified peptide inclusion               |
| Any         | Tryptic status requirement               |
| true        | Multiple, ambiguous IDs allowed          |
| Ignore      | Peptide validation handling              |
| XCorr       | Purge duplicate peptides by protein      |
| false       | Include only loci with unique peptide    |
| true        | Remove subset proteins                   |
| Ignore      | Locus validation handling                |
| Contaminant | Exclude protein names matching           |
| 0           | Minimum modified peptides per locus      |
| 1000        | Minimum redundancy for low coverage loci |
| 2           | Minimum peptides per locus               |

**Locus Key:**

|                                   |                       |                |                |                                   |        |       |    |                  |
|-----------------------------------|-----------------------|----------------|----------------|-----------------------------------|--------|-------|----|------------------|
| <a href="#">Validation Status</a> | <a href="#">Locus</a> | Sequence Count | Spectrum Count | <a href="#">Sequence Coverage</a> | Length | MolWt | pI | Descriptive Name |
|-----------------------------------|-----------------------|----------------|----------------|-----------------------------------|--------|-------|----|------------------|

**Similarity Key:**

|       |                         |                         |
|-------|-------------------------|-------------------------|
| Locus | # of identical peptides | # of differing peptides |
|-------|-------------------------|-------------------------|

|                   |                                        |              |               |                       |                |                 |            |                                                                                                                           |             |  |
|-------------------|----------------------------------------|--------------|---------------|-----------------------|----------------|-----------------|------------|---------------------------------------------------------------------------------------------------------------------------|-------------|--|
| <a href="#">U</a> | <b>TC31023 5 50-112</b>                | 4            | 6             | <a href="#">74.6%</a> | 63             | 6619            | 4.9        | similar to RF NP_997792.1 47086785 NM_212627 ubiquitin-fold modifier 1 {Danio rerio} (exp=-1; wgp=0; cg=0), partial (93%) |             |  |
|                   | <b>Filename</b>                        | <b>XCorr</b> | <b>DeltCN</b> | <b>Conf%</b>          | <b>ObsM+H+</b> | <b>CalcM+H+</b> | <b>SpR</b> | <b>ZScore</b>                                                                                                             | <b>Ion%</b> |  |
| *                 | <a href="#">SmEgg103.02569.02569.1</a> | 2.4374       | 0.1571        | 95.4%                 | 1285.57        | 1286.5138       | 174        | 4.42                                                                                                                      | 50.0%       |  |
| *                 | <a href="#">SmEgg102.04240.04240.3</a> | 5.4228       | 0.418         | 100.0%                | 3609.48        | 3610.0117       | 1          | 6.855                                                                                                                     | 23.5%       |  |
| *                 | <a href="#">SmEgg102.04226.04226.2</a> | 4.7267       | 0.3871        | 100.0%                | 2729.0         | 2729.0593       | 1          | 7.794                                                                                                                     | 44.2%       |  |
| *                 | <a href="#">SmEgg102.04228.04228.1</a> | 3.0791       | 0.2949        | 100.0%                | 1331.78        | 1332.4991       | 2          | 6.026                                                                                                                     | 59.1%       |  |

|                   |                         |              |               |                       |                |                 |            |                                                                   |             |  |
|-------------------|-------------------------|--------------|---------------|-----------------------|----------------|-----------------|------------|-------------------------------------------------------------------|-------------|--|
| <a href="#">U</a> | <b>TC20573 1 15-190</b> | 12           | 25            | <a href="#">73.9%</a> | 176            | 18480           | 8.3        | similar to UP Q5DC05_SCHJA (Q5DC05) SJCHGC05973 protein, complete |             |  |
|                   | <b>Filename</b>         | <b>XCorr</b> | <b>DeltCN</b> | <b>Conf%</b>          | <b>ObsM+H+</b> | <b>CalcM+H+</b> | <b>SpR</b> | <b>ZScore</b>                                                     | <b>Ion%</b> |  |

|   |                                        |        |        |        |         |           |    |       |       |
|---|----------------------------------------|--------|--------|--------|---------|-----------|----|-------|-------|
| * | <a href="#">SmEgg203.02622.02622.1</a> | 2.2613 | 0.1882 | 96.1%  | 1583.64 | 1584.8131 | 70 | 5.031 | 34.4% |
| * | <a href="#">SmEgg103.02525.02525.2</a> | 3.7816 | 0.2636 | 99.8%  | 1584.65 | 1584.8131 | 2  | 5.628 | 56.2% |
| * | <a href="#">SmEgg205.02425.02425.2</a> | 2.6619 | 0.3211 | 99.6%  | 1920.45 | 1921.1241 | 61 | 5.872 | 38.9% |
| * | <a href="#">SmEgg203.03944.03944.2</a> | 4.8028 | 0.4346 | 100.0% | 2468.84 | 2468.904  | 1  | 7.82  | 52.1% |
|   | <a href="#">SmEgg205.02877.02877.2</a> | 4.2956 | 0.2616 | 99.9%  | 1728.48 | 1728.9952 | 1  | 6.942 | 63.3% |
|   | <a href="#">SmEgg205.02731.02731.2</a> | 3.7677 | 0.352  | 99.9%  | 1900.84 | 1901.1289 | 3  | 6.345 | 53.3% |
|   | <a href="#">SmEgg306.02423.02423.2</a> | 3.8518 | 0.319  | 99.9%  | 2224.6  | 2224.4436 | 1  | 5.834 | 50.0% |
|   | <a href="#">SmEgg203.02735.02735.2</a> | 3.1277 | 0.2133 | 99.4%  | 1744.49 | 1744.9414 | 1  | 6.232 | 57.1% |
|   | <a href="#">SmEgg302.02376.02376.2</a> | 3.1349 | 0.2605 | 99.8%  | 2119.86 | 2120.3237 | 6  | 5.864 | 39.5% |
|   | <a href="#">SmEgg105.02749.02749.2</a> | 3.3416 | 0.3297 | 99.9%  | 1098.14 | 1098.3049 | 1  | 6.741 | 85.0% |
|   | <a href="#">SmEgg205.02885.02885.1</a> | 2.5253 | 0.1694 | 96.5%  | 1098.45 | 1098.3049 | 33 | 4.521 | 55.0% |
|   | <a href="#">SmEgg205.02463.02463.2</a> | 3.4454 | 0.0683 | 99.4%  | 1157.32 | 1157.4052 | 10 | 4.344 | 77.8% |

| U <b>TC26438 3 19-129</b> 22 54 <b>73.9%</b> 111 12475 6.1 UP Q8T9N5_SCHMA (Q8T9N5) Thioredoxin, complete |                                        |        |        |        |         |           |     |        |       |
|-----------------------------------------------------------------------------------------------------------|----------------------------------------|--------|--------|--------|---------|-----------|-----|--------|-------|
|                                                                                                           | Filename                               | XCorr  | DeltCN | Conf%  | ObsM+H+ | CalcM+H+  | SpR | ZScore | Ion%  |
| *                                                                                                         | <a href="#">SmEgg204.03098.03098.2</a> | 4.7256 | 0.3097 | 100.0% | 2108.46 | 2109.3843 | 1   | 7.044  | 64.7% |
| *                                                                                                         | <a href="#">SmEgg203.03062.03062.3</a> | 4.7373 | 0.278  | 100.0% | 2109.56 | 2109.3843 | 1   | 5.56   | 38.2% |
| *                                                                                                         | <a href="#">SmEgg102.02482.02482.2</a> | 2.8425 | 0.1582 | 97.1%  | 1512.33 | 1512.6165 | 13  | 3.914  | 62.5% |
| *                                                                                                         | <a href="#">SmEgg302.02331.02331.2</a> | 2.7249 | 0.2396 | 98.6%  | 1625.79 | 1626.7202 | 17  | 4.879  | 46.2% |
| *                                                                                                         | <a href="#">SmEgg303.02479.02479.2</a> | 3.0266 | 0.1917 | 98.6%  | 1868.33 | 1868.0538 | 27  | 4.905  | 43.3% |
| *                                                                                                         | <a href="#">SmEgg203.02544.02544.1</a> | 2.4767 | 0.1762 | 96.7%  | 1442.78 | 1442.6519 | 113 | 4.553  | 45.5% |
| *                                                                                                         | <a href="#">SmEgg303.02011.02011.1</a> | 2.3264 | 0.1949 | 97.5%  | 1199.6  | 1200.377  | 17  | 4.671  | 61.1% |
| *                                                                                                         | <a href="#">SmEgg303.02015.02015.2</a> | 3.1379 | 0.2332 | 99.8%  | 1200.41 | 1200.377  | 1   | 5.512  | 83.3% |
| *                                                                                                         | <a href="#">SmEgg303.02373.02373.2</a> | 3.3353 | 0.1858 | 99.7%  | 1298.47 | 1299.5095 | 1   | 5.115  | 85.0% |
| *                                                                                                         | <a href="#">SmEgg304.02423.02423.1</a> | 2.4859 | 0.181  | 97.4%  | 1298.59 | 1299.5095 | 1   | 4.57   | 65.0% |
| *                                                                                                         | <a href="#">SmEgg202.02232.02232.2</a> | 2.8946 | 0.1652 | 99.8%  | 856.09  | 856.0092  | 184 | 4.232  | 83.3% |
| *                                                                                                         | <a href="#">SmEgg202.01996.01996.2</a> | 3.4937 | 0.26   | 99.9%  | 1275.4  | 1275.4014 | 1   | 4.974  | 80.0% |
| *                                                                                                         | <a href="#">SmEgg304.02154.02154.2</a> | 3.0416 | 0.2513 | 99.8%  | 1566.51 | 1566.7515 | 1   | 5.513  | 66.7% |
| *                                                                                                         | <a href="#">SmEgg303.01904.01904.1</a> | 2.4975 | 0.1699 | 96.6%  | 1467.63 | 1467.6189 | 1   | 4.664  | 54.5% |
| *                                                                                                         | <a href="#">SmEgg303.01903.01903.2</a> | 2.8064 | 0.149  | 97.0%  | 1467.65 | 1467.6189 | 4   | 3.811  | 68.2% |
| *                                                                                                         | <a href="#">SmEgg206.02676.02676.2</a> | 3.9286 | 0.2028 | 99.8%  | 1597.74 | 1597.9562 | 1   | 5.289  | 69.2% |
| *                                                                                                         | <a href="#">SmEgg204.03472.03472.1</a> | 2.9633 | 0.328  | 100.0% | 1468.65 | 1469.7821 | 1   | 6.818  | 58.3% |
| *                                                                                                         | <a href="#">SmEgg204.03436.03436.2</a> | 3.7805 | 0.2811 | 99.9%  | 1469.55 | 1469.7821 | 1   | 5.494  | 83.3% |
| *                                                                                                         | <a href="#">SmEgg306.02532.02532.2</a> | 3.5386 | 0.1789 | 99.7%  | 2018.32 | 2018.3789 | 2   | 4.747  | 44.7% |
| *                                                                                                         | <a href="#">SmEgg206.02167.02167.1</a> | 2.0097 | 0.2129 | 96.0%  | 1015.53 | 1016.1827 | 19  | 4.314  | 60.0% |
| *                                                                                                         | <a href="#">SmEgg205.03702.03702.2</a> | 4.3287 | 0.4703 | 100.0% | 1730.65 | 1732.0454 | 1   | 8.349  | 68.8% |
| *                                                                                                         | <a href="#">SmEgg306.02687.02687.2</a> | 3.3015 | 0.124  | 99.7%  | 1251.59 | 1251.5701 | 4   | 4.647  | 77.8% |

| U <b>TC20394 3 7-191</b> 29 71 <b>70.8%</b> 185 21139 6.1 UP O97161_SCHMA (O97161) Thioredoxin peroxidase 1, complete |                                        |        |        |        |         |           |     |        |       |
|-----------------------------------------------------------------------------------------------------------------------|----------------------------------------|--------|--------|--------|---------|-----------|-----|--------|-------|
|                                                                                                                       | Filename                               | XCorr  | DeltCN | Conf%  | ObsM+H+ | CalcM+H+  | SpR | ZScore | Ion%  |
| *                                                                                                                     | <a href="#">SmEgg102.01930.01930.1</a> | 2.56   | 0.2689 | 100.0% | 1062.6  | 1063.1985 | 16  | 5.006  | 61.1% |
| *                                                                                                                     | <a href="#">SmEgg304.02355.02355.2</a> | 3.3078 | 0.266  | 99.8%  | 1521.22 | 1521.7632 | 2   | 5.195  | 58.3% |
| *                                                                                                                     | <a href="#">SmEgg104.00414.00414.2</a> | 3.357  | 0.3414 | 99.8%  | 2528.83 | 2529.901  | 2   | 6.248  | 40.0% |
| 2                                                                                                                     | <a href="#">SmEgg403.00038.00038.1</a> | 2.0915 | 0.3219 | 100.0% | 1559.52 | 1560.7528 | 3   | 5.885  | 45.8% |
| 2                                                                                                                     | <a href="#">SmEgg304.04266.04266.2</a> | 3.4568 | 0.239  | 99.8%  | 1560.34 | 1560.7528 | 1   | 6.225  | 70.8% |
| *                                                                                                                     | <a href="#">SmEgg302.01656.01656.2</a> | 3.4593 | 0.2101 | 99.8%  | 1211.32 | 1211.2303 | 1   | 4.992  | 83.3% |
| *                                                                                                                     | <a href="#">SmEgg201.02162.02162.1</a> | 1.7457 | 0.2678 | 99.3%  | 864.24  | 864.9062  | 258 | 4.97   | 58.3% |
| *                                                                                                                     | <a href="#">SmEgg102.01875.01875.2</a> | 4.654  | 0.3962 | 100.0% | 1770.1  | 1770.7822 | 1   | 7.703  | 71.4% |
| *                                                                                                                     | <a href="#">SmEgg105.02810.02810.2</a> | 4.5188 | 0.3849 | 100.0% | 2754.41 | 2754.8616 | 1   | 8.257  | 50.0% |
| *                                                                                                                     | <a href="#">SmEgg103.02762.02762.3</a> | 3.983  | 0.2734 | 99.3%  | 2754.57 | 2754.8616 | 1   | 5.087  | 38.6% |
| *                                                                                                                     | <a href="#">SmEgg203.02647.02647.2</a> | 3.1634 | 0.3458 | 99.8%  | 2882.1  | 2883.0356 | 1   | 7.014  | 37.0% |
| *                                                                                                                     | <a href="#">SmEgg102.02431.02431.2</a> | 4.1716 | 0.2587 | 99.9%  | 1909.66 | 1908.9786 | 1   | 5.97   | 60.0% |
| *                                                                                                                     | <a href="#">SmEgg106.02413.02413.2</a> | 3.6196 | 0.31   | 99.9%  | 2037.66 | 2037.1527 | 1   | 5.812  | 56.2% |

|   |                                        |        |        |        |         |           |     |       |       |
|---|----------------------------------------|--------|--------|--------|---------|-----------|-----|-------|-------|
| * | <a href="#">SmEgg306.02360.02360.2</a> | 3.4749 | 0.2272 | 99.7%  | 1770.67 | 1771.0038 | 6   | 5.953 | 50.0% |
| * | <a href="#">SmEgg305.02227.02227.2</a> | 3.4604 | 0.1861 | 99.7%  | 1657.4  | 1657.8444 | 1   | 4.965 | 64.3% |
| * | <a href="#">SmEgg305.02133.02133.2</a> | 3.7526 | 0.3338 | 99.9%  | 1586.51 | 1586.7655 | 1   | 6.16  | 73.1% |
| * | <a href="#">SmEgg202.02605.02605.1</a> | 2.2701 | 0.3246 | 100.0% | 1589.65 | 1590.6458 | 6   | 6.194 | 42.3% |
| * | <a href="#">SmEgg102.02537.02537.2</a> | 4.2403 | 0.3263 | 100.0% | 1591.59 | 1590.6458 | 1   | 7.211 | 76.9% |
| * | <a href="#">SmEgg302.03118.03118.2</a> | 2.8595 | 0.308  | 99.8%  | 1688.95 | 1689.7783 | 1   | 5.825 | 57.1% |
| * | <a href="#">SmEgg302.02890.02890.1</a> | 2.1828 | 0.2731 | 100.0% | 1525.58 | 1526.6024 | 1   | 5.044 | 57.7% |
| * | <a href="#">SmEgg304.02951.02951.2</a> | 3.6854 | 0.2975 | 99.9%  | 1526.59 | 1526.6024 | 1   | 5.72  | 69.2% |
| * | <a href="#">SmEgg402.02542.02542.1</a> | 2.1585 | 0.2371 | 99.3%  | 1222.58 | 1223.2413 | 245 | 4.607 | 50.0% |
| * | <a href="#">SmEgg206.03042.03042.2</a> | 3.3131 | 0.1914 | 99.8%  | 1328.31 | 1328.5974 | 6   | 5.155 | 77.3% |
| * | <a href="#">SmEgg305.03503.03503.2</a> | 3.4782 | 0.1609 | 99.8%  | 1399.39 | 1399.6763 | 3   | 4.354 | 72.7% |
| * | <a href="#">SmEgg102.03185.03185.2</a> | 3.8665 | 0.3414 | 100.0% | 1210.28 | 1210.4154 | 1   | 6.229 | 88.9% |
| * | <a href="#">SmEgg202.03291.03291.1</a> | 2.5    | 0.1654 | 98.5%  | 983.52  | 984.09656 | 100 | 4.119 | 71.4% |
| * | <a href="#">SmEgg104.01950.01950.1</a> | 3.0799 | 0.3817 | 100.0% | 1225.58 | 1226.3434 | 12  | 5.968 | 55.6% |
| * | <a href="#">SmEgg204.02016.02016.2</a> | 3.8754 | 0.2896 | 100.0% | 1226.32 | 1226.3434 | 1   | 6.359 | 83.3% |
| * | <a href="#">SmEgg306.02066.02066.2</a> | 2.3585 | 0.2617 | 96.4%  | 1624.41 | 1624.7655 | 3   | 5.287 | 50.0% |

Similarities: [TC201601|27-222\(2:27\)](#)

|   |                                        |        |        |        |         |           |     |        |       | UP Q869D4_SCHMA (Q869D4)                           |  |
|---|----------------------------------------|--------|--------|--------|---------|-----------|-----|--------|-------|----------------------------------------------------|--|
|   |                                        |        |        |        |         |           |     |        |       | Interleukin-4-inducing protein precursor, complete |  |
| U | TC24966 1 83-222                       | 35     | 300    | 70.7%  | 140     | 15919     | 8.7 |        |       |                                                    |  |
|   | Filename                               | XCorr  | DeltCN | Conf%  | ObsM+H+ | CalcM+H+  | SpR | ZScore | Ion%  |                                                    |  |
| * | <a href="#">SmEgg302.01698.01698.1</a> | 2.338  | 0.226  | 100.0% | 1073.44 | 1074.1078 | 4   | 5.194  | 71.4% |                                                    |  |
| * | <a href="#">SmEgg302.01671.01671.2</a> | 2.8173 | 0.1936 | 99.8%  | 1074.19 | 1074.1078 | 11  | 4.445  | 78.6% |                                                    |  |
| * | <a href="#">SmEgg106.02625.02625.2</a> | 3.9823 | 0.2625 | 99.9%  | 2027.47 | 2029.1427 | 1   | 5.043  | 64.3% |                                                    |  |
| * | <a href="#">SmEgg102.02521.02521.2</a> | 4.4872 | 0.3614 | 100.0% | 1653.57 | 1653.7516 | 1   | 7.175  | 81.8% |                                                    |  |
| * | <a href="#">SmEgg303.03088.03088.2</a> | 3.0332 | 0.3508 | 99.8%  | 2301.86 | 2302.465  | 1   | 5.809  | 52.9% |                                                    |  |
|   | <a href="#">SmEgg402.02008.02008.2</a> | 3.0432 | 0.03   | 96.8%  | 1145.88 | 1146.1986 | 8   | 3.7    | 75.0% |                                                    |  |
| * | <a href="#">SmEgg302.02066.02066.2</a> | 3.281  | 0.2528 | 99.8%  | 1638.19 | 1638.7277 | 2   | 5.866  | 66.7% |                                                    |  |
| * | <a href="#">SmEgg302.04494.04494.2</a> | 3.4672 | 0.2756 | 99.8%  | 1900.58 | 1901.0363 | 1   | 6.027  | 57.1% |                                                    |  |
| * | <a href="#">SmEgg304.02335.02335.2</a> | 2.2801 | 0.2778 | 96.8%  | 1623.54 | 1624.7008 | 18  | 5.045  | 45.8% |                                                    |  |
| * | <a href="#">SmEgg305.02683.02683.2</a> | 2.7243 | 0.1644 | 95.0%  | 1499.59 | 1499.7068 | 5   | 3.93   | 53.6% |                                                    |  |
| * | <a href="#">SmEgg206.02914.02914.2</a> | 3.5817 | 0.3521 | 99.9%  | 2431.72 | 2432.7014 | 1   | 6.352  | 50.0% |                                                    |  |
| * | <a href="#">SmEgg105.03445.03445.2</a> | 3.4703 | 0.234  | 99.8%  | 1901.91 | 1902.1229 | 1   | 5.396  | 53.1% |                                                    |  |
| * | <a href="#">SmEgg205.03537.03537.2</a> | 3.7221 | 0.2919 | 99.9%  | 2093.84 | 2094.2932 | 1   | 6.084  | 56.7% |                                                    |  |
| * | <a href="#">SmEgg106.03030.03030.2</a> | 4.5325 | 0.2533 | 100.0% | 1809.49 | 1808.9904 | 1   | 5.963  | 84.6% |                                                    |  |
| * | <a href="#">SmEgg302.01967.01967.2</a> | 3.0829 | 0.2131 | 99.8%  | 1300.35 | 1300.4136 | 1   | 6.075  | 85.0% |                                                    |  |
|   | <a href="#">SmEgg204.02320.02320.2</a> | 5.1168 | 0.46   | 100.0% | 1635.62 | 1635.7803 | 1   | 8.545  | 75.0% |                                                    |  |
| * | <a href="#">SmEgg105.02678.02678.2</a> | 3.509  | 0.2797 | 99.8%  | 2054.09 | 2055.261  | 1   | 5.723  | 50.0% |                                                    |  |
|   | <a href="#">SmEgg204.02386.02386.2</a> | 4.036  | 0.2989 | 99.9%  | 1522.05 | 1522.6208 | 1   | 6.045  | 69.2% |                                                    |  |
|   | <a href="#">SmEgg204.02316.02316.1</a> | 2.438  | 0.2968 | 100.0% | 1420.67 | 1421.5157 | 1   | 6.731  | 58.3% |                                                    |  |
|   | <a href="#">SmEgg104.02327.02327.2</a> | 3.9754 | 0.4059 | 100.0% | 1420.95 | 1421.5157 | 1   | 7.575  | 75.0% |                                                    |  |
|   | <a href="#">SmEgg304.02004.02004.1</a> | 2.3068 | 0.3152 | 100.0% | 1507.5  | 1508.594  | 1   | 6.373  | 42.3% |                                                    |  |
|   | <a href="#">SmEgg304.01994.01994.2</a> | 3.2629 | 0.2831 | 99.8%  | 1508.19 | 1508.594  | 2   | 5.991  | 61.5% |                                                    |  |
| * | <a href="#">SmEgg304.01992.01992.2</a> | 3.8943 | 0.4192 | 100.0% | 1565.71 | 1565.6459 | 1   | 7.08   | 67.9% |                                                    |  |
|   | <a href="#">SmEgg204.02341.02341.1</a> | 2.6317 | 0.1932 | 99.3%  | 1250.53 | 1251.3043 | 3   | 4.796  | 55.0% |                                                    |  |
|   | <a href="#">SmEgg305.02083.02083.1</a> | 3.0405 | 0.3598 | 100.0% | 1337.5  | 1338.3826 | 1   | 6.811  | 68.2% |                                                    |  |
|   | <a href="#">SmEgg303.01799.01799.2</a> | 3.6072 | 0.3057 | 99.9%  | 1338.3  | 1338.3826 | 1   | 5.912  | 81.8% |                                                    |  |
| * | <a href="#">SmEgg303.01832.01832.1</a> | 2.6209 | 0.3235 | 100.0% | 1394.51 | 1395.4344 | 2   | 5.951  | 54.2% |                                                    |  |
| * | <a href="#">SmEgg303.01807.01807.2</a> | 3.3201 | 0.3059 | 99.8%  | 1395.42 | 1395.4344 | 1   | 6.388  | 66.7% |                                                    |  |
|   | <a href="#">SmEgg103.02295.02295.1</a> | 2.5696 | 0.2508 | 100.0% | 1193.59 | 1194.2524 | 1   | 5.418  | 72.2% |                                                    |  |
|   | <a href="#">SmEgg204.02317.02317.1</a> | 2.0365 | 0.1916 | 95.2%  | 1056.44 | 1057.1113 | 8   | 4.851  | 56.2% |                                                    |  |
|   | <a href="#">SmEgg302.01920.01920.2</a> | 3.1625 | 0.361  | 99.9%  | 1144.41 | 1144.1896 | 1   | 6.688  | 77.8% |                                                    |  |
|   | <a href="#">SmEgg405.01579.01579.2</a> | 2.6802 | 0.1875 | 98.0%  | 1334.2  | 1334.4814 | 19  | 4.066  | 70.0% |                                                    |  |
| * | <a href="#">SmEgg203.01610.01610.1</a> | 2.8556 | 0.1459 | 97.4%  | 1287.63 | 1288.4094 | 65  | 4.187  | 60.0% |                                                    |  |

|   |                                        |        |        |       |         |           |   |       |       |
|---|----------------------------------------|--------|--------|-------|---------|-----------|---|-------|-------|
| * | <a href="#">SmEgg203.01470.01470.2</a> | 3.2385 | 0.0667 | 97.8% | 1288.15 | 1288.4094 | 5 | 4.094 | 75.0% |
| * | <a href="#">SmEgg102.01352.01352.2</a> | 2.7807 | 0.1098 | 98.6% | 988.06  | 988.09485 | 5 | 3.504 | 85.7% |

Similarities: [AI8204764|115-174](#)(1:34)

|   |                                        |              |               |              |                |                 |            |                                                                      |             |  |
|---|----------------------------------------|--------------|---------------|--------------|----------------|-----------------|------------|----------------------------------------------------------------------|-------------|--|
| U | <b>TC21580 2 18-143</b>                | 6            | 20            | 67.5%        | 126            | 14478           | 4.8        | similar to UP Q5DBB2_SCHJA (Q5DBB2)<br>SJCHGC04204 protein, complete |             |  |
|   | <b>Filename</b>                        | <b>XCorr</b> | <b>DeltCN</b> | <b>Conf%</b> | <b>ObsM+H+</b> | <b>CalcM+H+</b> | <b>SpR</b> | <b>ZScore</b>                                                        | <b>Ion%</b> |  |
| * | <a href="#">SmEgg102.03824.03824.2</a> | 4.0475       | 0.3252        | 99.9%        | 2897.97        | 2899.1377       | 1          | 7.238                                                                | 40.0%       |  |
| * | <a href="#">SmEgg303.03956.03956.2</a> | 4.7273       | 0.4698        | 100.0%       | 2449.73        | 2450.723        | 1          | 8.355                                                                | 50.0%       |  |
|   | <a href="#">SmEgg305.02731.02731.2</a> | 3.2423       | 0.1938        | 99.7%        | 1575.73        | 1574.8328       | 23         | 4.614                                                                | 62.5%       |  |
| * | <a href="#">SmEgg202.04768.04768.2</a> | 4.829        | 0.4753        | 100.0%       | 2999.94        | 3001.2454       | 1          | 8.595                                                                | 48.0%       |  |
| * | <a href="#">SmEgg104.01976.01976.1</a> | 2.3196       | 0.2007        | 97.4%        | 1160.66        | 1161.303        | 4          | 5.372                                                                | 61.1%       |  |
| * | <a href="#">SmEgg105.01914.01914.2</a> | 3.2202       | 0.2251        | 99.8%        | 1026.45        | 1026.1808       | 1          | 5.045                                                                | 87.5%       |  |

|   |                                        |              |               |              |                |                 |            |                                                                    |             |  |
|---|----------------------------------------|--------------|---------------|--------------|----------------|-----------------|------------|--------------------------------------------------------------------|-------------|--|
| U | <b>TC30286 3 19-393</b>                | 28           | 75            | 67.2%        | 375            | 40999           | 7.7        | UP ALF_SCHMA (P53442)<br>Fructose-bisphosphate aldolase , complete |             |  |
|   | <b>Filename</b>                        | <b>XCorr</b> | <b>DeltCN</b> | <b>Conf%</b> | <b>ObsM+H+</b> | <b>CalcM+H+</b> | <b>SpR</b> | <b>ZScore</b>                                                      | <b>Ion%</b> |  |
|   | <a href="#">SmEgg104.02322.02322.2</a> | 3.5828       | 0.2637        | 99.8%        | 1880.25        | 1881.0549       | 2          | 5.68                                                               | 64.3%       |  |
|   | <a href="#">SmEgg102.02405.02405.2</a> | 2.9174       | 0.2385        | 99.4%        | 1724.65        | 1724.8676       | 1          | 5.043                                                              | 69.2%       |  |
|   | <a href="#">SmEgg206.02088.02088.2</a> | 3.4029       | 0.3           | 99.9%        | 1185.44        | 1185.3782       | 3          | 5.612                                                              | 75.0%       |  |
|   | <a href="#">SmEgg204.01825.01825.2</a> | 3.3697       | 0.1554        | 99.7%        | 1029.22        | 1029.1907       | 1          | 5.439                                                              | 94.4%       |  |
| * | <a href="#">SmEgg102.02079.02079.1</a> | 2.5909       | 0.2567        | 100.0%       | 1365.56        | 1365.5414       | 1          | 5.498                                                              | 53.8%       |  |
| * | <a href="#">SmEgg104.01796.01796.2</a> | 4.4092       | 0.3558        | 100.0%       | 1699.6         | 1699.8209       | 1          | 6.635                                                              | 65.4%       |  |
| * | <a href="#">SmEgg104.02058.02058.2</a> | 2.4055       | 0.1863        | 96.9%        | 1059.08        | 1059.2101       | 209        | 3.788                                                              | 62.5%       |  |
| * | <a href="#">SmEgg205.04759.04759.2</a> | 4.0181       | 0.2819        | 99.9%        | 2041.61        | 2042.3397       | 1          | 5.76                                                               | 58.8%       |  |
| * | <a href="#">SmEgg303.01515.01515.2</a> | 2.8015       | 0.0691        | 97.4%        | 1033.56        | 1032.1411       | 1          | 2.782                                                              | 92.9%       |  |
|   | <a href="#">SmEgg302.01907.01907.2</a> | 3.3254       | 0.2262        | 99.8%        | 1845.56        | 1846.0013       | 1          | 5.601                                                              | 58.8%       |  |
|   | <a href="#">SmEgg202.02779.02779.2</a> | 4.939        | 0.5001        | 100.0%       | 2330.87        | 2331.4985       | 1          | 8.724                                                              | 59.1%       |  |
|   | <a href="#">SmEgg102.02725.02725.2</a> | 4.5096       | 0.4212        | 100.0%       | 2075.74        | 2076.1814       | 1          | 7.835                                                              | 50.0%       |  |
|   | <a href="#">SmEgg206.02886.02886.2</a> | 4.7508       | 0.4546        | 100.0%       | 2187.78        | 2188.5066       | 1          | 8.923                                                              | 63.2%       |  |
| * | <a href="#">SmEgg203.03586.03586.3</a> | 4.5327       | 0.2583        | 100.0%       | 3450.24        | 3449.8083       | 10         | 5.184                                                              | 22.5%       |  |
| * | <a href="#">SmEgg302.03364.03364.2</a> | 2.938        | 0.2077        | 98.6%        | 2698.08        | 2698.9897       | 29         | 5.255                                                              | 27.1%       |  |
| * | <a href="#">SmEgg402.03963.03963.2</a> | 2.6251       | 0.2672        | 98.5%        | 2328.27        | 2328.6245       | 1          | 5.065                                                              | 40.5%       |  |
| * | <a href="#">SmEgg103.03438.03438.2</a> | 3.7207       | 0.2478        | 99.8%        | 2217.67        | 2215.468        | 1          | 4.97                                                               | 47.4%       |  |
| * | <a href="#">SmEgg203.03035.03035.2</a> | 4.3942       | 0.2913        | 100.0%       | 1297.36        | 1297.537        | 1          | 5.255                                                              | 85.0%       |  |
|   | <a href="#">SmEgg205.02763.02763.2</a> | 3.3006       | 0.2036        | 99.6%        | 1680.24        | 1680.9445       | 4          | 5.071                                                              | 53.6%       |  |
|   | <a href="#">SmEgg206.02438.02438.2</a> | 3.5927       | 0.2878        | 99.8%        | 1892.84        | 1892.1649       | 1          | 6.344                                                              | 56.2%       |  |
|   | <a href="#">SmEgg303.01715.01715.1</a> | 2.3205       | 0.2446        | 99.1%        | 1141.56        | 1142.2133       | 100        | 4.933                                                              | 44.4%       |  |
|   | <a href="#">SmEgg103.01077.01077.1</a> | 2.2821       | 0.2143        | 99.3%        | 965.45         | 966.10657       | 5          | 5.367                                                              | 68.8%       |  |
|   | <a href="#">SmEgg103.02097.02097.2</a> | 3.1405       | 0.2801        | 99.8%        | 1434.13        | 1434.5919       | 1          | 5.871                                                              | 79.2%       |  |
| * | <a href="#">SmEgg204.03478.03478.2</a> | 2.9776       | 0.3061        | 99.7%        | 2286.46        | 2286.5872       | 1          | 5.75                                                               | 43.2%       |  |
| * | <a href="#">SmEgg204.03524.03524.2</a> | 4.7094       | 0.3969        | 100.0%       | 2086.01        | 2086.3496       | 1          | 8.629                                                              | 50.0%       |  |
| * | <a href="#">SmEgg203.02042.02042.1</a> | 3.0459       | 0.2934        | 100.0%       | 1380.51        | 1381.5284       | 2          | 5.91                                                               | 68.2%       |  |
| * | <a href="#">SmEgg203.02043.02043.2</a> | 2.8327       | 0.296         | 99.7%        | 1381.39        | 1381.5284       | 1          | 5.782                                                              | 72.7%       |  |
| * | <a href="#">SmEgg103.02241.02241.1</a> | 1.8923       | 0.2682        | 99.3%        | 1021.49        | 1022.14844      | 74         | 5.534                                                              | 50.0%       |  |

|   |                                        |              |               |              |                |                 |            |                                                                 |             |  |
|---|----------------------------------------|--------------|---------------|--------------|----------------|-----------------|------------|-----------------------------------------------------------------|-------------|--|
| U | <b>TC28682 2 17-340</b>                | 47           | 121           | 64.8%        | 324            | 36084           | 6.5        | UP P40_SCHMA (P12812) Major egg<br>antigen (p40), partial (96%) |             |  |
|   | <b>Filename</b>                        | <b>XCorr</b> | <b>DeltCN</b> | <b>Conf%</b> | <b>ObsM+H+</b> | <b>CalcM+H+</b> | <b>SpR</b> | <b>ZScore</b>                                                   | <b>Ion%</b> |  |
|   | <a href="#">SmEgg202.04399.04399.2</a> | 3.7932       | 0.4167        | 100.0%       | 2768.92        | 2769.9402       | 1          | 6.971                                                           | 47.8%       |  |
|   | <a href="#">SmEgg402.04495.04495.2</a> | 2.3402       | 0.2659        | 96.0%        | 2283.3         | 2284.3972       | 1          | 5.185                                                           | 36.8%       |  |
|   | <a href="#">SmEgg102.04282.04282.2</a> | 2.8276       | 0.2516        | 99.0%        | 2596.87        | 2598.7844       | 1          | 5.844                                                           | 40.5%       |  |
|   | <a href="#">SmEgg102.04245.04245.2</a> | 3.5619       | 0.1216        | 99.0%        | 2514.69        | 2511.7063       | 1          | 4.383                                                           | 40.0%       |  |
|   | <a href="#">SmEgg202.04267.04267.2</a> | 4.1179       | 0.2882        | 99.9%        | 2398.46        | 2398.5469       | 1          | 6.486                                                           | 50.0%       |  |
|   | <a href="#">SmEgg202.04395.04395.2</a> | 3.8353       | 0.2662        | 99.8%        | 2327.55        | 2327.468        | 1          | 5.735                                                           | 44.4%       |  |
|   | <a href="#">SmEgg202.04177.04177.2</a> | 2.9424       | 0.2926        | 99.8%        | 2229.65        | 2230.3513       | 1          | 5.583                                                           | 52.9%       |  |

|   |                                        |        |        |        |         |           |    |        |       |
|---|----------------------------------------|--------|--------|--------|---------|-----------|----|--------|-------|
|   | <a href="#">SmEgg102.03992.03992.2</a> | 3.7226 | 0.3728 | 100.0% | 2066.33 | 2067.1755 | 1  | 6.555  | 62.5% |
|   | <a href="#">SmEgg104.04278.04278.2</a> | 3.2333 | 0.231  | 99.7%  | 1884.41 | 1885.1699 | 2  | 4.997  | 53.1% |
|   | <a href="#">SmEgg102.02998.02998.2</a> | 3.8934 | 0.3028 | 99.9%  | 1768.71 | 1767.9917 | 1  | 6.825  | 59.4% |
|   | <a href="#">SmEgg202.02899.02899.1</a> | 2.0689 | 0.2493 | 99.3%  | 1491.67 | 1492.669  | 3  | 5.146  | 50.0% |
|   | <a href="#">SmEgg202.02901.02901.2</a> | 3.3894 | 0.2469 | 99.8%  | 1492.44 | 1492.669  | 1  | 5.485  | 84.6% |
|   | <a href="#">SmEgg102.03008.03008.1</a> | 2.7469 | 0.2249 | 100.0% | 1164.55 | 1165.2883 | 1  | 5.378  | 60.0% |
|   | <a href="#">SmEgg304.02663.02663.2</a> | 3.8855 | 0.3852 | 100.0% | 2097.26 | 2098.3196 | 7  | 6.651  | 44.1% |
| 2 | <a href="#">SmEgg102.01517.01517.1</a> | 2.6322 | 0.2314 | 100.0% | 1082.4  | 1083.0967 | 1  | 5.638  | 66.7% |
|   | <a href="#">SmEgg302.01594.01594.1</a> | 2.2961 | 0.2719 | 100.0% | 1203.57 | 1204.2816 | 1  | 5.308  | 60.0% |
|   | <a href="#">SmEgg303.01849.01849.2</a> | 2.9336 | 0.3298 | 99.8%  | 1478.83 | 1479.6323 | 1  | 6.108  | 66.7% |
|   | <a href="#">SmEgg104.02586.02586.2</a> | 3.8318 | 0.3077 | 99.9%  | 2352.81 | 2352.5254 | 1  | 6.773  | 47.5% |
|   | <a href="#">SmEgg102.02547.02547.2</a> | 4.7383 | 0.4601 | 100.0% | 2096.63 | 2097.2053 | 1  | 7.751  | 61.1% |
|   | <a href="#">SmEgg303.00958.00958.2</a> | 2.1614 | 0.2289 | 95.7%  | 1029.13 | 1029.0977 | 39 | 5.176  | 75.0% |
|   | <a href="#">SmEgg404.02370.02370.1</a> | 2.5633 | 0.2746 | 100.0% | 1470.65 | 1471.694  | 1  | 5.483  | 62.5% |
|   | <a href="#">SmEgg304.02016.02016.2</a> | 3.3028 | 0.1932 | 99.7%  | 1470.83 | 1471.694  | 7  | 4.822  | 66.7% |
|   | <a href="#">SmEgg304.02026.02026.2</a> | 3.28   | 0.2744 | 99.8%  | 1631.68 | 1631.8328 | 1  | 5.227  | 65.4% |
|   | <a href="#">SmEgg305.02159.02159.2</a> | 3.0241 | 0.3    | 99.7%  | 1787.7  | 1788.0203 | 1  | 5.404  | 60.7% |
|   | <a href="#">SmEgg202.02911.02911.2</a> | 4.9534 | 0.0587 | 99.8%  | 1519.41 | 1519.8115 | 1  | 7.245  | 84.6% |
|   | <a href="#">SmEgg202.03039.03039.2</a> | 4.6944 | 0.1264 | 99.8%  | 2189.95 | 2191.4763 | 1  | 7.413  | 60.5% |
|   | <a href="#">SmEgg203.01996.01996.1</a> | 3.873  | 0.4204 | 100.0% | 1447.52 | 1448.5321 | 1  | 7.957  | 64.3% |
|   | <a href="#">SmEgg103.01930.01930.2</a> | 3.879  | 0.3107 | 99.9%  | 1448.48 | 1448.5321 | 1  | 7.485  | 64.3% |
|   | <a href="#">SmEgg105.02141.02141.2</a> | 2.519  | 0.2332 | 96.4%  | 1601.82 | 1604.7196 | 1  | 4.859  | 56.7% |
|   | <a href="#">SmEgg202.01826.01826.1</a> | 1.8907 | 0.2991 | 99.5%  | 1097.47 | 1098.1547 | 8  | 5.248  | 55.0% |
|   | <a href="#">SmEgg302.01026.01026.2</a> | 2.724  | 0.1797 | 98.1%  | 1141.2  | 1141.1826 | 42 | 5.113  | 60.0% |
|   | <a href="#">SmEgg206.02380.02380.2</a> | 3.0666 | 0.1475 | 97.4%  | 1892.8  | 1893.1497 | 6  | 4.881  | 46.7% |
|   | <a href="#">SmEgg206.02538.02538.2</a> | 2.9004 | 0.2288 | 98.8%  | 2007.11 | 2006.3091 | 4  | 4.766  | 43.8% |
|   | <a href="#">SmEgg404.02782.02782.2</a> | 3.5454 | 0.3346 | 99.9%  | 1621.53 | 1621.8737 | 1  | 6.419  | 76.9% |
|   | <a href="#">SmEgg304.03242.03242.2</a> | 3.8825 | 0.3759 | 100.0% | 2209.85 | 2210.5347 | 1  | 7.043  | 52.8% |
|   | <a href="#">SmEgg204.03562.03562.2</a> | 2.9577 | 0.1921 | 98.1%  | 2781.15 | 2782.1252 | 1  | 5.225  | 32.6% |
|   | <a href="#">SmEgg204.03508.03508.3</a> | 3.7032 | 0.3793 | 100.0% | 2781.47 | 2782.1252 | 1  | 6.654  | 31.5% |
|   | <a href="#">SmEgg305.02980.02980.2</a> | 3.4956 | 0.3991 | 99.9%  | 2096.43 | 2097.3752 | 1  | 7.196  | 50.0% |
|   | <a href="#">SmEgg202.03341.03341.2</a> | 2.463  | 0.2359 | 95.9%  | 2530.91 | 2531.8247 | 1  | 4.761  | 33.3% |
|   | <a href="#">SmEgg102.04469.04469.3</a> | 3.104  | 0.3201 | 95.0%  | 3357.16 | 3356.795  | 6  | 5.324  | 21.0% |
|   | <a href="#">SmEgg202.04661.04661.2</a> | 3.538  | 0.3824 | 99.9%  | 3140.46 | 3141.586  | 1  | 7.07   | 36.2% |
|   | <a href="#">SmEgg202.04649.04649.2</a> | 4.1874 | 0.3668 | 100.0% | 3053.79 | 3054.5078 | 1  | 7.652  | 41.1% |
|   | <a href="#">SmEgg102.04408.04408.2</a> | 4.9954 | 0.5352 | 100.0% | 2891.08 | 2891.3318 | 1  | 10.093 | 46.3% |
|   | <a href="#">SmEgg104.00082.00082.2</a> | 2.6603 | 0.3707 | 99.7%  | 2819.66 | 2820.253  | 1  | 6.373  | 30.8% |
|   | <a href="#">SmEgg204.00038.00038.2</a> | 5.3458 | 0.4809 | 100.0% | 2706.28 | 2707.0935 | 1  | 9.789  | 50.0% |
|   | <a href="#">SmEgg203.03066.03066.2</a> | 5.0076 | 0.3018 | 100.0% | 1867.88 | 1868.1809 | 1  | 6.497  | 58.8% |
|   | <a href="#">SmEgg306.02119.02119.2</a> | 3.5381 | 0.3009 | 99.8%  | 1586.47 | 1586.8314 | 1  | 5.656  | 76.9% |

Similarities: [TC24053|1188-403\(25:22\)](#)

[TC33404|21-299\(31:16\)](#)

[TC24393|322-281\(24:23\)](#)

| <u>U</u> | <b>TC24436 2 19-194</b>                | 9      | 41     | <a href="#">64.8%</a> | 176     | 19950     | 6.3 | UP Q1WMM9_SCHMA (Q1WMM9) Venom allergen-like protein 3, complete |       |   |
|----------|----------------------------------------|--------|--------|-----------------------|---------|-----------|-----|------------------------------------------------------------------|-------|---|
|          | Filename                               | XCorr  | DeltCN | Conf%                 | ObsM+H+ | CalcM+H+  | SpR | ZScore                                                           | Ion%  |   |
| *        | <a href="#">SmEgg105.00010.00010.2</a> | 4.1287 | 0.3441 | 100.0%                | 2967.31 | 2968.2898 | 1   | 6.089                                                            | 42.3% | : |
| *        | <a href="#">SmEgg204.00130.00130.3</a> | 4.0791 | 0.3463 | 100.0%                | 2967.53 | 2968.2898 | 1   | 6.493                                                            | 31.7% | : |
| *        | <a href="#">SmEgg104.00010.00010.2</a> | 5.151  | 0.5291 | 100.0%                | 1917.67 | 1918.0697 | 1   | 8.915                                                            | 75.0% | : |
| *        | <a href="#">SmEgg203.02036.02036.2</a> | 4.263  | 0.3022 | 100.0%                | 1734.51 | 1734.8695 | 1   | 6.505                                                            | 71.4% | : |
| *        | <a href="#">SmEgg205.04589.04589.2</a> | 5.1074 | 0.3935 | 100.0%                | 2603.62 | 2603.9062 | 1   | 7.78                                                             | 50.0% | : |
| *        | <a href="#">SmEgg206.03575.03575.3</a> | 4.0304 | 0.4271 | 100.0%                | 2603.73 | 2603.9062 | 1   | 6.798                                                            | 33.0% | : |
| *        | <a href="#">SmEgg203.01872.01872.2</a> | 4.257  | 0.3793 | 100.0%                | 1936.59 | 1937.9032 | 1   | 7.712                                                            | 63.3% | : |
| *        | <a href="#">SmEgg103.02426.02426.2</a> | 5.111  | 0.4423 | 100.0%                | 1800.68 | 1800.9751 | 1   | 8.42                                                             | 73.3% | : |
| *        | <a href="#">SmEgg203.03306.03306.2</a> | 3.9568 | 0.3829 | 100.0%                | 2127.25 | 2128.3699 | 1   | 6.808                                                            | 59.4% | : |

| <b>U TC24053 1 188-403</b>             |        |        |        |         |           |     | UP P40_SCHMA (P12812) Major egg antigen (p40), complete |       |  |  |
|----------------------------------------|--------|--------|--------|---------|-----------|-----|---------------------------------------------------------|-------|--|--|
| Filename                               | XCorr  | DeltCN | Conf%  | ObsM+H+ | CalcM+H+  | SpR | ZScore                                                  | Ion%  |  |  |
| <a href="#">SmEgg104.02586.02586.2</a> | 3.8318 | 0.3077 | 99.9%  | 2352.81 | 2352.5254 | 1   | 6.773                                                   | 47.5% |  |  |
| <a href="#">SmEgg102.02547.02547.2</a> | 4.7383 | 0.4601 | 100.0% | 2096.63 | 2097.2053 | 1   | 7.751                                                   | 61.1% |  |  |
| <a href="#">SmEgg303.00958.00958.2</a> | 2.1614 | 0.2289 | 95.7%  | 1029.13 | 1029.0977 | 39  | 5.176                                                   | 75.0% |  |  |
| <a href="#">SmEgg404.02370.02370.1</a> | 2.5633 | 0.2746 | 100.0% | 1470.65 | 1471.694  | 1   | 5.483                                                   | 62.5% |  |  |
| <a href="#">SmEgg304.02016.02016.2</a> | 3.3028 | 0.1932 | 99.7%  | 1470.83 | 1471.694  | 7   | 4.822                                                   | 66.7% |  |  |
| <a href="#">SmEgg304.02026.02026.2</a> | 3.28   | 0.2744 | 99.8%  | 1631.68 | 1631.8328 | 1   | 5.227                                                   | 65.4% |  |  |
| <a href="#">SmEgg305.02159.02159.2</a> | 3.0241 | 0.3    | 99.7%  | 1787.7  | 1788.0203 | 1   | 5.404                                                   | 60.7% |  |  |
| <a href="#">SmEgg202.02911.02911.2</a> | 4.9534 | 0.0587 | 99.8%  | 1519.41 | 1519.8115 | 1   | 7.245                                                   | 84.6% |  |  |
| <a href="#">SmEgg202.03039.03039.2</a> | 4.6944 | 0.1264 | 99.8%  | 2189.95 | 2191.4763 | 1   | 7.413                                                   | 60.5% |  |  |
| <a href="#">SmEgg203.01996.01996.1</a> | 3.873  | 0.4204 | 100.0% | 1447.52 | 1448.5321 | 1   | 7.957                                                   | 64.3% |  |  |
| <a href="#">SmEgg103.01930.01930.2</a> | 3.879  | 0.3107 | 99.9%  | 1448.48 | 1448.5321 | 1   | 7.485                                                   | 64.3% |  |  |
| <a href="#">SmEgg105.02141.02141.2</a> | 2.519  | 0.2332 | 96.4%  | 1601.82 | 1604.7196 | 1   | 4.859                                                   | 56.7% |  |  |
| <a href="#">SmEgg202.01826.01826.1</a> | 1.8907 | 0.2991 | 99.5%  | 1097.47 | 1098.1547 | 8   | 5.248                                                   | 55.0% |  |  |
| <a href="#">SmEgg302.01026.01026.2</a> | 2.724  | 0.1797 | 98.1%  | 1141.2  | 1141.1826 | 42  | 5.113                                                   | 60.0% |  |  |
| <a href="#">SmEgg206.02380.02380.2</a> | 3.0666 | 0.1475 | 97.4%  | 1892.8  | 1893.1497 | 6   | 4.881                                                   | 46.7% |  |  |
| <a href="#">SmEgg206.02538.02538.2</a> | 2.9004 | 0.2288 | 98.8%  | 2007.11 | 2006.3091 | 4   | 4.766                                                   | 43.8% |  |  |
| <a href="#">SmEgg406.02714.02714.2</a> | 2.7439 | 0.1978 | 96.9%  | 2378.18 | 2379.6843 | 1   | 4.432                                                   | 44.7% |  |  |
| <a href="#">SmEgg404.02782.02782.2</a> | 3.5454 | 0.3346 | 99.9%  | 1621.53 | 1621.8737 | 1   | 6.419                                                   | 76.9% |  |  |
| <a href="#">SmEgg304.02774.02774.2</a> | 3.5135 | 0.3055 | 99.8%  | 2222.71 | 2223.4968 | 1   | 6.026                                                   | 52.8% |  |  |
| <a href="#">SmEgg303.03031.03031.2</a> | 3.3553 | 0.2532 | 99.8%  | 2437.64 | 2437.718  | 1   | 5.349                                                   | 45.0% |  |  |
| <a href="#">SmEgg303.02935.02935.2</a> | 3.1166 | 0.2345 | 99.6%  | 2637.79 | 2638.9001 | 1   | 4.948                                                   | 40.9% |  |  |
| <a href="#">SmEgg203.02943.02943.3</a> | 3.7307 | 0.372  | 100.0% | 2794.08 | 2795.0876 | 1   | 6.948                                                   | 32.6% |  |  |
| <a href="#">SmEgg204.03065.03065.2</a> | 3.3499 | 0.3255 | 99.8%  | 2794.1  | 2795.0876 | 1   | 6.237                                                   | 34.8% |  |  |
| <a href="#">SmEgg304.02466.02466.2</a> | 3.6156 | 0.3851 | 99.9%  | 2110.27 | 2110.3374 | 1   | 6.37                                                    | 52.9% |  |  |
| <a href="#">SmEgg202.02736.02736.2</a> | 2.3609 | 0.2627 | 96.1%  | 2544.13 | 2544.787  | 10  | 4.485                                                   | 31.0% |  |  |
| <a href="#">SmEgg102.04469.04469.3</a> | 3.104  | 0.3201 | 95.0%  | 3357.16 | 3356.795  | 6   | 5.324                                                   | 21.0% |  |  |
| <a href="#">SmEgg202.04661.04661.2</a> | 3.538  | 0.3824 | 99.9%  | 3140.46 | 3141.586  | 1   | 7.07                                                    | 36.2% |  |  |
| <a href="#">SmEgg202.04649.04649.2</a> | 4.1874 | 0.3668 | 100.0% | 3053.79 | 3054.5078 | 1   | 7.652                                                   | 41.1% |  |  |
| <a href="#">SmEgg102.04408.04408.2</a> | 4.9954 | 0.5352 | 100.0% | 2891.08 | 2891.3318 | 1   | 10.093                                                  | 46.3% |  |  |
| <a href="#">SmEgg104.00082.00082.2</a> | 2.6603 | 0.3707 | 99.7%  | 2819.66 | 2820.253  | 1   | 6.373                                                   | 30.8% |  |  |
| <a href="#">SmEgg204.00038.00038.2</a> | 5.3458 | 0.4809 | 100.0% | 2706.28 | 2707.0935 | 1   | 9.789                                                   | 50.0% |  |  |
| <a href="#">SmEgg203.03066.03066.2</a> | 5.0076 | 0.3018 | 100.0% | 1867.88 | 1868.1809 | 1   | 6.497                                                   | 58.8% |  |  |
| <a href="#">SmEgg306.02119.02119.2</a> | 3.5381 | 0.3009 | 99.8%  | 1586.47 | 1586.8314 | 1   | 5.656                                                   | 76.9% |  |  |

Similarities: [TC28682|17-340\(25:8\)](#)[TC33404|2|1-299\(14:19\)](#)[TC24393|3|22-281\(7:26\)](#)

| <b>U AW497769 3 1-80</b>                 |        |        |        |         |           |     | no description |       |  |  |
|------------------------------------------|--------|--------|--------|---------|-----------|-----|----------------|-------|--|--|
| Filename                                 | XCorr  | DeltCN | Conf%  | ObsM+H+ | CalcM+H+  | SpR | ZScore         | Ion%  |  |  |
| * <a href="#">SmEgg202.02226.02226.2</a> | 3.3413 | 0.3434 | 99.8%  | 2266.64 | 2267.2656 | 1   | 6.444          | 38.2% |  |  |
| * <a href="#">SmEgg302.01710.01710.2</a> | 3.4135 | 0.3187 | 99.8%  | 1865.2  | 1864.8154 | 1   | 5.375          | 60.0% |  |  |
| * <a href="#">SmEgg102.01969.01969.2</a> | 4.5085 | 0.4469 | 100.0% | 2359.35 | 2359.4067 | 1   | 7.156          | 50.0% |  |  |
| * <a href="#">SmEgg304.01207.01207.2</a> | 2.709  | 0.1577 | 97.9%  | 1142.37 | 1143.242  | 2   | 4.611          | 77.8% |  |  |
| * <a href="#">SmEgg306.02010.02010.2</a> | 2.8604 | 0.2264 | 98.6%  | 1832.59 | 1832.9706 | 8   | 4.633          | 46.4% |  |  |
| <a href="#">SmEgg306.01942.01942.2</a>   | 3.1061 | 0.1741 | 99.4%  | 1545.58 | 1545.6548 | 2   | 4.488          | 72.7% |  |  |
| <a href="#">SmEgg304.01464.01464.2</a>   | 2.8032 | 0.1168 | 97.2%  | 1293.86 | 1294.4099 | 91  | 3.547          | 66.7% |  |  |
| * <a href="#">SmEgg206.02287.02287.2</a> | 3.8896 | 0.2767 | 99.9%  | 1665.5  | 1664.9634 | 1   | 5.458          | 70.8% |  |  |
| * <a href="#">SmEgg103.02303.02303.1</a> | 2.6451 | 0.1614 | 97.2%  | 1507.6  | 1508.776  | 1   | 4.201          | 68.2% |  |  |
| * <a href="#">SmEgg103.02299.02299.2</a> | 3.83   | 0.2054 | 99.8%  | 1509.23 | 1508.776  | 1   | 5.347          | 81.8% |  |  |

**U TC19827|3|12-261** 24 61 [63.6%](#) 250 28230 5.0 UP|14331\_SCHMA (Q26540) 14-3-3 protein homolog 1, complete

|   | Filename                               | XCorr  | DeltCN | Conf%  | ObsM+H+ | CalcM+H+  | SpR | ZScore | Ion%  |
|---|----------------------------------------|--------|--------|--------|---------|-----------|-----|--------|-------|
|   | <a href="#">SmEgg202.02268.02268.1</a> | 2.8342 | 0.2125 | 100.0% | 1325.59 | 1326.4924 | 3   | 4.844  | 63.6% |
|   | <a href="#">SmEgg202.02272.02272.2</a> | 4.1811 | 0.321  | 100.0% | 1326.28 | 1326.4924 | 1   | 6.684  | 86.4% |
|   | <a href="#">SmEgg202.02188.02188.2</a> | 3.9855 | 0.2306 | 99.8%  | 1813.7  | 1814.0382 | 1   | 6.166  | 66.7% |
| * | <a href="#">SmEgg203.01791.01791.1</a> | 2.3318 | 0.2043 | 97.9%  | 1596.61 | 1596.6536 | 7   | 4.809  | 46.2% |
| * | <a href="#">SmEgg203.01786.01786.2</a> | 4.1511 | 0.3743 | 100.0% | 1596.65 | 1596.6536 | 1   | 6.408  | 69.2% |
| 2 | <a href="#">SmEgg204.01268.01268.2</a> | 2.4308 | 0.2347 | 99.2%  | 900.29  | 901.06854 | 29  | 4.642  | 78.6% |
| 2 | <a href="#">SmEgg104.01146.01146.1</a> | 2.3634 | 0.1581 | 96.7%  | 900.41  | 901.06854 | 4   | 4.246  | 78.6% |
| * | <a href="#">SmEgg206.00099.00099.2</a> | 4.8658 | 0.3908 | 100.0% | 3046.05 | 3047.352  | 1   | 7.104  | 38.5% |
| * | <a href="#">SmEgg106.03808.03808.3</a> | 4.0305 | 0.2081 | 98.5%  | 3047.68 | 3047.352  | 1   | 5.411  | 31.7% |
| * | <a href="#">SmEgg303.03661.03661.2</a> | 3.3492 | 0.2124 | 99.7%  | 2108.86 | 2108.3525 | 1   | 4.987  | 47.2% |
| * | <a href="#">SmEgg304.04295.04295.2</a> | 3.134  | 0.1959 | 99.1%  | 2367.68 | 2368.6887 | 2   | 5.485  | 42.5% |
| * | <a href="#">SmEgg302.03943.03943.2</a> | 3.0392 | 0.1339 | 96.6%  | 2185.46 | 2184.4504 | 3   | 4.334  | 44.4% |
| * | <a href="#">SmEgg206.03816.03816.1</a> | 2.5077 | 0.2211 | 100.0% | 930.49  | 930.9469  | 3   | 4.68   | 68.8% |
| * | <a href="#">SmEgg102.01939.01939.1</a> | 2.1311 | 0.1921 | 95.5%  | 1223.56 | 1224.3129 | 1   | 4.901  | 65.0% |
| * | <a href="#">SmEgg205.02247.02247.2</a> | 3.5823 | 0.3763 | 99.9%  | 1593.49 | 1593.78   | 1   | 6.633  | 60.7% |
| * | <a href="#">SmEgg306.02422.02422.2</a> | 2.9857 | 0.3265 | 99.8%  | 1805.61 | 1806.072  | 1   | 5.604  | 43.8% |
| * | <a href="#">SmEgg306.02412.02412.2</a> | 2.6403 | 0.205  | 96.3%  | 1706.46 | 1704.967  | 1   | 3.958  | 46.7% |
| * | <a href="#">SmEgg305.02268.02268.2</a> | 2.8206 | 0.1984 | 98.6%  | 1362.63 | 1362.5718 | 1   | 4.57   | 68.2% |
| * | <a href="#">SmEgg306.02386.02386.2</a> | 2.8164 | 0.2552 | 99.3%  | 1532.51 | 1532.7831 | 2   | 4.987  | 53.8% |
|   | <a href="#">SmEgg202.03939.03939.2</a> | 6.203  | 0.4027 | 100.0% | 2116.74 | 2117.2305 | 1   | 8.488  | 66.7% |
|   | <a href="#">SmEgg304.03182.03182.2</a> | 3.061  | 0.2657 | 99.7%  | 2199.89 | 2199.4346 | 2   | 4.701  | 38.9% |
|   | <a href="#">SmEgg202.03948.03948.1</a> | 2.407  | 0.3126 | 100.0% | 1424.56 | 1425.4918 | 1   | 6.148  | 68.2% |
| 2 | <a href="#">SmEgg103.03729.03729.2</a> | 3.9306 | 0.0448 | 99.8%  | 1190.3  | 1190.4436 | 1   | 3.656  | 88.9% |
| * | <a href="#">SmEgg101.02881.02881.2</a> | 2.8552 | 0.1613 | 96.3%  | 2182.03 | 2181.1877 | 9   | 4.832  | 39.5% |

Similarities: [TC30162|3|15-252](#)(7:17)[TC22539|2|57-333](#)(1:23)[TC19970|3|1529-1794](#)(1:23)

| U | TC22057 3 19-162                       | 11     | 26     | 61.1%  | 144     | 16398     | 5.7 | no description |       |
|---|----------------------------------------|--------|--------|--------|---------|-----------|-----|----------------|-------|
|   | Filename                               | XCorr  | DeltCN | Conf%  | ObsM+H+ | CalcM+H+  | SpR | ZScore         | Ion%  |
| * | <a href="#">SmEgg103.01506.01506.2</a> | 2.6149 | 0.125  | 97.6%  | 952.15  | 952.055   | 3   | 4.312          | 92.9% |
| * | <a href="#">SmEgg203.01380.01380.1</a> | 2.4446 | 0.3164 | 100.0% | 1378.49 | 1379.3948 | 1   | 5.773          | 60.0% |
| * | <a href="#">SmEgg103.01201.01201.2</a> | 3.2964 | 0.2386 | 99.8%  | 1379.53 | 1379.3948 | 1   | 5.511          | 80.0% |
| * | <a href="#">SmEgg103.02959.02959.3</a> | 5.126  | 0.4022 | 100.0% | 3812.46 | 3812.8596 | 1   | 7.372          | 26.6% |
| * | <a href="#">SmEgg103.01751.01751.2</a> | 3.5098 | 0.1772 | 99.8%  | 1695.42 | 1694.7308 | 1   | 5.784          | 66.7% |
| * | <a href="#">SmEgg102.01678.01678.2</a> | 2.874  | 0.2338 | 99.8%  | 1149.3  | 1149.2122 | 27  | 4.515          | 81.2% |
| * | <a href="#">SmEgg304.01404.01404.1</a> | 2.5325 | 0.2921 | 100.0% | 1213.34 | 1214.2092 | 1   | 6.438          | 72.2% |
| * | <a href="#">SmEgg304.01440.01440.2</a> | 3.0337 | 0.2472 | 99.8%  | 1213.9  | 1214.2092 | 1   | 5.401          | 83.3% |
| * | <a href="#">SmEgg305.02925.02925.2</a> | 3.1571 | 0.2847 | 99.8%  | 2349.96 | 2350.4475 | 1   | 5.969          | 47.5% |
| * | <a href="#">SmEgg404.02276.02276.1</a> | 2.2446 | 0.2452 | 99.2%  | 1103.17 | 1103.1455 | 1   | 5.339          | 65.0% |
| * | <a href="#">SmEgg305.02939.02939.1</a> | 2.2477 | 0.2127 | 97.9%  | 1378.64 | 1379.481  | 2   | 5.553          | 58.3% |

| U | TC20815 1 101-266                      | 9      | 21     | 60.8%  | 166     | 18184     | 8.3 | UP PPIA_SCHMA (Q26565) Peptidyl-prolyl<br>cis-trans isomerase (PPIase) (Rotamase)<br>(Cyclophilin) (Cyclosporin A-binding protein)<br>(p17.7) (Smp17.7), complete |       |
|---|----------------------------------------|--------|--------|--------|---------|-----------|-----|-------------------------------------------------------------------------------------------------------------------------------------------------------------------|-------|
|   | Filename                               | XCorr  | DeltCN | Conf%  | ObsM+H+ | CalcM+H+  | SpR | ZScore                                                                                                                                                            | Ion%  |
|   | <a href="#">SmEgg103.03681.03681.2</a> | 4.0612 | 0.3966 | 100.0% | 1680.27 | 1680.8981 | 1   | 7.155                                                                                                                                                             | 80.8% |
|   | <a href="#">SmEgg203.02871.02871.2</a> | 3.136  | 0.4105 | 99.9%  | 2129.77 | 2130.3027 | 1   | 6.825                                                                                                                                                             | 52.5% |
|   | <a href="#">SmEgg203.02882.02882.2</a> | 3.3146 | 0.1424 | 98.6%  | 1903.94 | 1903.9838 | 1   | 5.442                                                                                                                                                             | 47.2% |
|   | <a href="#">SmEgg206.03072.03072.3</a> | 3.7267 | 0.3261 | 99.3%  | 3585.93 | 3586.9233 | 1   | 5.825                                                                                                                                                             | 21.9% |
| * | <a href="#">SmEgg304.02058.02058.2</a> | 3.301  | 0.3203 | 99.9%  | 1175.24 | 1175.4723 | 1   | 6.832                                                                                                                                                             | 80.0% |
|   | <a href="#">SmEgg105.01923.01923.1</a> | 3.0579 | 0.3146 | 100.0% | 1436.76 | 1437.6514 | 1   | 6.444                                                                                                                                                             | 57.7% |
|   | <a href="#">SmEgg105.01919.01919.2</a> | 4.4204 | 0.2765 | 100.0% | 1437.48 | 1437.6514 | 1   | 6.15                                                                                                                                                              | 73.1% |
| * | <a href="#">SmEgg305.01983.01983.2</a> | 3.1525 | 0.1095 | 96.4%  | 2067.37 | 2067.2332 | 3   | 4.333                                                                                                                                                             | 44.4% |

\* [SmEgg101.01905.01905.1](#) 2.2979 0.1611 95.2% 1108.34 1109.1506 1 5.253 75.0% :

U **TC19819|3|16-237** 29 172 [59.5%](#) 222 26540 8.9 UP|Q2Y2H5\_SCHMA (Q2Y2H5)  
Hepatotoxic ribonuclease omega-1 precursor, complete

|    | Filename                               | XCorr  | DeltCN | Conf%  | ObsM+H+ | CalcM+H+  | SpR | ZScore | Ion%  |
|----|----------------------------------------|--------|--------|--------|---------|-----------|-----|--------|-------|
| *  | <a href="#">SmEgg204.04265.04265.2</a> | 3.3279 | 0.2498 | 99.7%  | 2758.87 | 2758.9785 | 1   | 4.884  | 40.0% |
| *  | <a href="#">SmEgg203.02543.02543.2</a> | 3.2164 | 0.455  | 100.0% | 1886.05 | 1885.0156 | 1   | 6.716  | 60.7% |
| *  | <a href="#">SmEgg206.03234.03234.2</a> | 3.1927 | 0.3629 | 99.9%  | 1411.52 | 1411.4866 | 1   | 7.231  | 70.0% |
| *  | <a href="#">SmEgg102.04517.04517.1</a> | 2.6634 | 0.1981 | 99.2%  | 1411.69 | 1411.4866 | 3   | 4.659  | 60.0% |
| *  | <a href="#">SmEgg205.04139.04139.2</a> | 2.9626 | 0.1804 | 98.2%  | 1658.48 | 1658.8969 | 25  | 5.065  | 50.0% |
| *  | <a href="#">SmEgg206.03130.03130.2</a> | 3.7654 | 0.3765 | 100.0% | 1815.03 | 1815.0844 | 1   | 6.753  | 57.1% |
|    | <a href="#">SmEgg204.03296.03296.1</a> | 2.8345 | 0.2842 | 100.0% | 1395.63 | 1396.6471 | 1   | 6.373  | 70.0% |
|    | <a href="#">SmEgg204.03300.03300.2</a> | 3.9569 | 0.2127 | 99.9%  | 1396.04 | 1396.6471 | 2   | 5.188  | 80.0% |
|    | <a href="#">SmEgg203.02690.02690.2</a> | 4.8661 | 0.363  | 100.0% | 1777.68 | 1777.897  | 1   | 7.357  | 75.0% |
|    | <a href="#">SmEgg104.02917.02917.3</a> | 5.5461 | 0.3693 | 100.0% | 2272.77 | 2273.4753 | 1   | 6.994  | 48.6% |
|    | <a href="#">SmEgg204.02966.02966.2</a> | 5.6121 | 0.4806 | 100.0% | 2272.9  | 2273.4753 | 1   | 8.152  | 69.4% |
|    | <a href="#">SmEgg402.03062.03062.2</a> | 2.4958 | 0.267  | 99.0%  | 1235.19 | 1235.3453 | 6   | 4.876  | 60.0% |
|    | <a href="#">SmEgg402.03050.03050.1</a> | 2.1565 | 0.2385 | 99.3%  | 1236.35 | 1235.3453 | 2   | 4.77   | 65.0% |
|    | <a href="#">SmEgg402.03187.03187.2</a> | 3.0314 | 0.331  | 99.8%  | 1640.14 | 1640.7559 | 1   | 6.338  | 65.4% |
|    | <a href="#">SmEgg102.02851.02851.2</a> | 3.5183 | 0.1185 | 98.7%  | 1967.69 | 1966.123  | 13  | 4.256  | 50.0% |
|    | <a href="#">SmEgg402.02664.02664.2</a> | 2.9844 | 0.1301 | 98.2%  | 1310.3  | 1310.4056 | 3   | 4.439  | 70.0% |
|    | <a href="#">SmEgg204.02960.02960.1</a> | 2.5971 | 0.3314 | 100.0% | 1390.67 | 1391.5687 | 5   | 5.782  | 60.0% |
|    | <a href="#">SmEgg104.02560.02560.2</a> | 3.3459 | 0.2198 | 99.8%  | 1391.23 | 1391.5687 | 1   | 5.606  | 75.0% |
| *2 | <a href="#">SmEgg204.02544.02544.2</a> | 3.7156 | 0.1528 | 99.9%  | 965.06  | 965.19867 | 7   | 3.657  | 100.0 |
|    | <a href="#">SmEgg106.01993.01993.2</a> | 3.0551 | 0.1672 | 99.8%  | 1102.51 | 1103.2229 | 1   | 4.655  | 87.5% |
| *  | <a href="#">SmEgg406.02479.02479.2</a> | 2.8872 | 0.3068 | 99.8%  | 1918.3  | 1919.1626 | 1   | 6.421  | 56.7% |
| *  | <a href="#">SmEgg302.02418.02418.1</a> | 2.0616 | 0.2134 | 96.7%  | 1355.55 | 1356.4932 | 301 | 4.506  | 45.0% |
| *  | <a href="#">SmEgg302.02423.02423.2</a> | 2.6601 | 0.1373 | 95.8%  | 1356.12 | 1356.4932 | 8   | 3.788  | 75.0% |
| *  | <a href="#">SmEgg203.03714.03714.2</a> | 4.4443 | 0.3757 | 100.0% | 1608.86 | 1609.8376 | 1   | 7.724  | 83.3% |
| *  | <a href="#">SmEgg206.02448.02448.2</a> | 4.8377 | 0.4229 | 100.0% | 1756.85 | 1757.971  | 1   | 7.769  | 76.9% |
| *  | <a href="#">SmEgg303.01924.01924.1</a> | 2.2799 | 0.1723 | 96.0%  | 1185.47 | 1186.2756 | 3   | 4.751  | 62.5% |
| *  | <a href="#">SmEgg206.02428.02428.2</a> | 4.6687 | 0.4464 | 100.0% | 1750.99 | 1751.9296 | 1   | 8.342  | 80.8% |
|    | <a href="#">SmEgg106.03032.03032.1</a> | 2.9565 | 0.18   | 100.0% | 1023.53 | 1024.2505 | 1   | 4.511  | 78.6% |
|    | <a href="#">SmEgg205.03353.03353.2</a> | 3.3726 | 0.1125 | 99.8%  | 1024.27 | 1024.2505 | 6   | 4.231  | 92.9% |

U **TC25980|3|18-179** 8 37 [58.6%](#) 162 18846 4.9 weakly similar to UP|Q5D8L5\_SCHJA  
(Q5D8L5) SJCHGC06436 protein, partial (91%)

|   | Filename                               | XCorr  | DeltCN | Conf%  | ObsM+H+ | CalcM+H+  | SpR | ZScore | Ion%  |
|---|----------------------------------------|--------|--------|--------|---------|-----------|-----|--------|-------|
| * | <a href="#">SmEgg105.04270.04270.2</a> | 5.3008 | 0.4476 | 100.0% | 2361.46 | 2362.6284 | 1   | 7.741  | 55.3% |
| * | <a href="#">SmEgg403.02435.02435.2</a> | 2.616  | 0.3368 | 99.7%  | 1678.61 | 1678.8486 | 1   | 5.262  | 57.7% |
| * | <a href="#">SmEgg104.03087.03087.2</a> | 3.7133 | 0.2974 | 99.9%  | 1592.63 | 1591.7705 | 3   | 5.413  | 57.1% |
| * | <a href="#">SmEgg306.01871.01871.2</a> | 3.7302 | 0.199  | 99.8%  | 1341.64 | 1341.51   | 1   | 5.313  | 85.0% |
| * | <a href="#">SmEgg203.01567.01567.1</a> | 2.4591 | 0.2331 | 100.0% | 1056.42 | 1057.1484 | 9   | 4.839  | 62.5% |
| * | <a href="#">SmEgg203.01555.01555.2</a> | 2.358  | 0.1713 | 95.7%  | 1057.53 | 1057.1484 | 20  | 4.409  | 68.8% |
| * | <a href="#">SmEgg303.03855.03855.2</a> | 4.3591 | 0.2574 | 99.9%  | 2216.78 | 2217.4524 | 1   | 6.09   | 58.8% |
| * | <a href="#">SmEgg402.04880.04880.2</a> | 3.1542 | 0.2459 | 99.7%  | 2400.71 | 2401.5908 | 1   | 5.297  | 50.0% |

U **TC22188|1|20-162** 6 14 [56.6%](#) 143 16147 4.3 homologue to  
GB|BAB61796.1|14588599|AB063183  
calmodulin {Metridium senile} (exp=-1; wgp=0;  
cg=0), complete

|  | Filename                               | XCorr  | DeltCN | Conf%  | ObsM+H+ | CalcM+H+  | SpR | ZScore | Ion%  |
|--|----------------------------------------|--------|--------|--------|---------|-----------|-----|--------|-------|
|  | <a href="#">SmEgg302.02142.02142.1</a> | 2.4916 | 0.2165 | 99.2%  | 1268.68 | 1269.3507 | 1   | 4.526  | 63.6% |
|  | <a href="#">SmEgg304.00134.00134.3</a> | 4.8114 | 0.3997 | 100.0% | 3512.41 | 3513.783  | 1   | 7.874  | 25.8% |



|   |                                        |        |        |        |         |           |   |       |       |   |
|---|----------------------------------------|--------|--------|--------|---------|-----------|---|-------|-------|---|
|   | <a href="#">SmEgg205.00411.00411.2</a> | 2.7355 | 0.1808 | 96.0%  | 2443.39 | 2444.693  | 1 | 4.668 | 35.7% | : |
|   | <a href="#">SmEgg202.02541.02541.2</a> | 3.3654 | 0.306  | 99.9%  | 1249.76 | 1250.3538 | 1 | 5.828 | 81.8% | : |
| 2 | <a href="#">SmEgg204.02737.02737.2</a> | 4.4869 | 0.409  | 100.0% | 1928.51 | 1929.0038 | 1 | 7.337 | 65.6% | : |
| 2 | <a href="#">SmEgg102.03813.03813.2</a> | 4.5261 | 0.4347 | 100.0% | 2490.21 | 2491.7468 | 1 | 7.616 | 45.2% | : |

|   |                          |    |     |                       |     |       |     |                                                                           |  |  |
|---|--------------------------|----|-----|-----------------------|-----|-------|-----|---------------------------------------------------------------------------|--|--|
| U | <b>CD180629 3 11-139</b> | 11 | 104 | <a href="#">55.8%</a> | 129 | 14338 | 5.3 | no description                                                            |  |  |
| U | <b>TC20385 3 1-146</b>   | 11 | 104 | <a href="#">49.3%</a> | 146 | 16416 | 5.7 | similar to UP Q5DHY8_SCHJA (Q5DHY8)<br>SJCHGC00284 protein, partial (88%) |  |  |

|  | Filename                               | XCorr  | DeltCN | Conf%  | ObsM+H+ | CalcM+H+  | SpR | ZScore | Ion%  | # |
|--|----------------------------------------|--------|--------|--------|---------|-----------|-----|--------|-------|---|
|  | <a href="#">SmEgg103.02361.02361.2</a> | 3.9938 | 0.2339 | 99.8%  | 1683.22 | 1683.831  | 2   | 5.761  | 69.2% | 2 |
|  | <a href="#">SmEgg205.02781.02781.2</a> | 3.5094 | 0.3234 | 99.9%  | 2158.74 | 2159.4194 | 1   | 6.236  | 44.1% | 3 |
|  | <a href="#">SmEgg103.03555.03555.2</a> | 3.4265 | 0.2799 | 99.8%  | 2532.81 | 2533.8135 | 1   | 6.361  | 43.2% | 2 |
|  | <a href="#">SmEgg303.03653.03653.2</a> | 3.316  | 0.2848 | 99.8%  | 2695.96 | 2696.9895 | 2   | 6.124  | 34.8% | 4 |
|  | <a href="#">SmEgg303.03576.03576.2</a> | 2.9607 | 0.138  | 96.1%  | 2514.26 | 2512.7512 | 1   | 3.807  | 38.1% | 1 |
|  | <a href="#">SmEgg405.03779.03779.2</a> | 2.9334 | 0.2337 | 99.1%  | 2195.17 | 2196.4805 | 1   | 5.014  | 50.0% | 2 |
|  | <a href="#">SmEgg305.03131.03131.2</a> | 3.1065 | 0.328  | 99.8%  | 1808.6  | 1809.0784 | 1   | 6.267  | 50.0% | 2 |
|  | <a href="#">SmEgg206.02246.02246.1</a> | 2.6547 | 0.2528 | 100.0% | 1274.51 | 1275.4467 | 2   | 5.038  | 55.6% | 4 |
|  | <a href="#">SmEgg303.04451.04451.2</a> | 4.805  | 0.3103 | 100.0% | 2520.78 | 2521.7493 | 1   | 6.771  | 57.5% | 8 |
|  | <a href="#">SmEgg402.04831.04831.2</a> | 3.0932 | 0.2748 | 99.8%  | 1963.94 | 1965.1304 | 1   | 6.809  | 46.9% | 1 |
|  | <a href="#">SmEgg402.04767.04767.2</a> | 2.947  | 0.3134 | 99.7%  | 1762.86 | 1762.9636 | 2   | 6.105  | 57.1% | 1 |

|   |                         |    |    |                       |     |       |     |                                                                            |  |  |
|---|-------------------------|----|----|-----------------------|-----|-------|-----|----------------------------------------------------------------------------|--|--|
| U | <b>TC20197 1 14-643</b> | 35 | 73 | <a href="#">55.7%</a> | 630 | 70712 | 6.9 | UP Q9XYR4_SCHMA (Q9XYR4)<br>Phosphoenolpyruvate carboxykinase,<br>complete |  |  |
|---|-------------------------|----|----|-----------------------|-----|-------|-----|----------------------------------------------------------------------------|--|--|

|   | Filename                               | XCorr  | DeltCN | Conf%  | ObsM+H+ | CalcM+H+  | SpR | ZScore | Ion%  | # |
|---|----------------------------------------|--------|--------|--------|---------|-----------|-----|--------|-------|---|
| * | <a href="#">SmEgg304.02682.02682.2</a> | 3.131  | 0.3238 | 99.8%  | 1625.36 | 1625.8373 | 2   | 6.454  | 54.2% |   |
| * | <a href="#">SmEgg204.02577.02577.2</a> | 4.828  | 0.4346 | 100.0% | 2012.62 | 2013.23   | 1   | 8.243  | 75.0% |   |
| * | <a href="#">SmEgg204.02465.02465.3</a> | 3.6339 | 0.2651 | 99.4%  | 2425.83 | 2427.6484 | 1   | 6.271  | 31.6% |   |
| * | <a href="#">SmEgg106.02433.02433.2</a> | 3.7158 | 0.3957 | 100.0% | 2426.89 | 2427.6484 | 2   | 6.998  | 39.5% |   |
| * | <a href="#">SmEgg203.02400.02400.2</a> | 3.6119 | 0.3058 | 99.8%  | 1853.81 | 1853.9923 | 1   | 5.846  | 67.9% |   |
| * | <a href="#">SmEgg203.02151.02151.2</a> | 4.2101 | 0.321  | 100.0% | 2052.71 | 2053.1614 | 1   | 6.607  | 59.4% |   |
| * | <a href="#">SmEgg403.01899.01899.2</a> | 3.3454 | 0.3228 | 99.8%  | 1549.48 | 1549.5968 | 1   | 6.376  | 61.5% |   |
| * | <a href="#">SmEgg202.03155.03155.2</a> | 3.0238 | 0.2712 | 99.8%  | 1372.35 | 1372.5609 | 1   | 4.956  | 81.8% |   |
| * | <a href="#">SmEgg102.03056.03056.1</a> | 2.3315 | 0.2114 | 99.0%  | 1372.68 | 1372.5609 | 17  | 4.333  | 50.0% |   |
| * | <a href="#">SmEgg106.03200.03200.2</a> | 3.4127 | 0.1713 | 99.5%  | 1905.95 | 1906.3337 | 1   | 5.235  | 55.9% |   |
| * | <a href="#">SmEgg106.01984.01984.2</a> | 3.3531 | 0.2391 | 99.8%  | 1484.49 | 1484.5438 | 1   | 5.128  | 75.0% |   |
| * | <a href="#">SmEgg204.02177.02177.1</a> | 2.772  | 0.3066 | 100.0% | 1536.51 | 1537.6813 | 1   | 6.211  | 72.7% |   |
| * | <a href="#">SmEgg204.02172.02172.2</a> | 3.8741 | 0.333  | 100.0% | 1537.51 | 1537.6813 | 1   | 5.788  | 77.3% |   |
| * | <a href="#">SmEgg105.02098.02098.2</a> | 2.457  | 0.1502 | 97.0%  | 894.3   | 895.0898  | 2   | 3.557  | 85.7% |   |
| * | <a href="#">SmEgg204.03301.03301.2</a> | 4.9029 | 0.4031 | 100.0% | 1701.17 | 1701.9781 | 1   | 8.586  | 62.5% |   |
| * | <a href="#">SmEgg403.02190.02190.1</a> | 2.5198 | 0.1783 | 97.4%  | 1490.64 | 1491.6842 | 1   | 5.11   | 50.0% |   |
| * | <a href="#">SmEgg204.02369.02369.1</a> | 2.8514 | 0.1862 | 99.2%  | 1239.43 | 1240.4106 | 1   | 5.124  | 63.6% |   |
| * | <a href="#">SmEgg204.03336.03336.2</a> | 3.7592 | 0.3209 | 99.9%  | 1575.33 | 1575.8812 | 1   | 5.722  | 69.2% |   |
| * | <a href="#">SmEgg202.02704.02704.2</a> | 4.0831 | 0.0793 | 99.7%  | 1450.4  | 1450.6184 | 1   | 6.391  | 81.8% |   |
| * | <a href="#">SmEgg404.02934.02934.2</a> | 2.3855 | 0.2218 | 96.7%  | 1178.51 | 1179.3207 | 1   | 5.474  | 65.0% |   |
| * | <a href="#">SmEgg204.02981.02981.2</a> | 4.0496 | 0.3288 | 100.0% | 1789.88 | 1790.0287 | 1   | 5.615  | 50.0% |   |
| * | <a href="#">SmEgg103.02123.02123.1</a> | 2.7657 | 0.1845 | 99.3%  | 1236.61 | 1237.3983 | 16  | 5.022  | 60.0% |   |
| * | <a href="#">SmEgg103.04358.04358.2</a> | 3.1378 | 0.1411 | 97.6%  | 2651.87 | 2652.8328 | 1   | 4.864  | 35.7% |   |
| * | <a href="#">SmEgg206.00242.00242.3</a> | 4.8536 | 0.3803 | 100.0% | 3302.6  | 3302.5806 | 1   | 6.508  | 26.9% |   |
| * | <a href="#">SmEgg303.04563.04563.2</a> | 3.8562 | 0.2776 | 99.9%  | 2604.62 | 2604.7888 | 1   | 6.92   | 45.2% |   |
| * | <a href="#">SmEgg106.02262.02262.2</a> | 3.8369 | 0.2754 | 99.9%  | 1716.73 | 1715.888  | 1   | 6.436  | 69.2% |   |
| * | <a href="#">SmEgg306.02976.02976.2</a> | 3.2706 | 0.2102 | 99.7%  | 1580.96 | 1581.8113 | 2   | 5.191  | 57.7% |   |
| * | <a href="#">SmEgg105.03501.03501.2</a> | 3.8414 | 0.3339 | 99.9%  | 1852.53 | 1852.1027 | 1   | 6.562  | 75.0% |   |
| * | <a href="#">SmEgg106.03062.03062.2</a> | 4.8423 | 0.4256 | 100.0% | 1786.38 | 1786.0837 | 1   | 8.134  | 75.0% |   |
| * | <a href="#">SmEgg305.02893.02893.2</a> | 2.4562 | 0.1975 | 97.1%  | 1220.22 | 1220.4314 | 9   | 4.43   | 66.7% |   |

|   |                                        |        |        |       |         |           |    |       |       |
|---|----------------------------------------|--------|--------|-------|---------|-----------|----|-------|-------|
| * | <a href="#">SmEgg202.01865.01865.1</a> | 2.4986 | 0.2185 | 99.2% | 1024.45 | 1025.1033 | 10 | 5.717 | 66.7% |
| * | <a href="#">SmEgg204.03041.03041.2</a> | 2.5725 | 0.2341 | 98.6% | 1337.3  | 1337.5236 | 4  | 4.619 | 65.0% |
| * | <a href="#">SmEgg206.02520.02520.2</a> | 3.647  | 0.2994 | 99.8% | 1878.87 | 1879.1667 | 1  | 6.328 | 52.9% |
| * | <a href="#">SmEgg104.01571.01571.2</a> | 2.745  | 0.0961 | 97.7% | 974.26  | 974.10443 | 40 | 3.954 | 85.7% |
| * | <a href="#">SmEgg102.02977.02977.2</a> | 4.0718 | 0.2622 | 99.9% | 1669.12 | 1668.804  | 1  | 5.753 | 69.2% |

**U TC32093|3|19-397** 25 62 **55.7%** 379 42055 5.5 UP|ACT2\_SCHMA (P53471) Actin-2, complete

|   | Filename                               | XCorr  | DeltCN | Conf%  | ObsM+H+ | CalcM+H+  | SpR | ZScore | Ion%  |
|---|----------------------------------------|--------|--------|--------|---------|-----------|-----|--------|-------|
|   | <a href="#">SmEgg202.01774.01774.1</a> | 2.0286 | 0.2247 | 96.7%  | 976.47  | 977.02136 | 1   | 5.112  | 66.7% |
|   | <a href="#">SmEgg205.02209.02209.1</a> | 2.7514 | 0.2612 | 100.0% | 1171.51 | 1172.4058 | 1   | 4.667  | 65.0% |
|   | <a href="#">SmEgg205.02211.02211.2</a> | 3.0693 | 0.227  | 99.7%  | 1172.39 | 1172.4058 | 1   | 5.314  | 80.0% |
|   | <a href="#">SmEgg304.01858.01858.2</a> | 3.5916 | 0.2828 | 99.8%  | 1952.76 | 1952.1313 | 1   | 6.628  | 50.0% |
|   | <a href="#">SmEgg304.02215.02215.2</a> | 3.6091 | 0.3454 | 99.9%  | 2165.91 | 2166.3958 | 1   | 5.841  | 47.4% |
|   | <a href="#">SmEgg202.01542.01542.1</a> | 3.1705 | 0.346  | 100.0% | 1198.52 | 1199.2163 | 1   | 6.827  | 70.0% |
|   | <a href="#">SmEgg202.01565.01565.2</a> | 3.0669 | 0.2362 | 99.7%  | 1199.27 | 1199.2163 | 2   | 5.186  | 80.0% |
|   | <a href="#">SmEgg304.02386.02386.2</a> | 2.6965 | 0.291  | 99.3%  | 1737.77 | 1737.9506 | 5   | 5.877  | 50.0% |
|   | <a href="#">SmEgg305.02804.02804.2</a> | 3.1836 | 0.2502 | 99.8%  | 1510.42 | 1511.6544 | 1   | 5.687  | 85.0% |
|   | <a href="#">SmEgg203.02518.02518.2</a> | 4.0687 | 0.3964 | 100.0% | 1954.79 | 1955.2615 | 1   | 7.19   | 64.7% |
|   | <a href="#">SmEgg104.02419.02419.2</a> | 3.8852 | 0.2216 | 99.8%  | 1784.57 | 1785.0502 | 1   | 5.996  | 66.7% |
|   | <a href="#">SmEgg304.02752.02752.2</a> | 2.6997 | 0.1799 | 95.7%  | 2507.96 | 2508.747  | 39  | 4.141  | 30.4% |
|   | <a href="#">SmEgg205.03457.03457.3</a> | 4.5735 | 0.3607 | 100.0% | 3167.46 | 3167.5889 | 1   | 5.664  | 25.9% |
|   | <a href="#">SmEgg205.03427.03427.2</a> | 3.4224 | 0.2611 | 99.8%  | 3167.65 | 3167.5889 | 9   | 5.099  | 25.9% |
| 2 | <a href="#">SmEgg302.01903.01903.1</a> | 2.5855 | 0.1978 | 99.3%  | 1169.52 | 1170.2645 | 34  | 4.631  | 59.1% |
|   | <a href="#">SmEgg303.02939.02939.2</a> | 2.7348 | 0.2468 | 98.6%  | 2092.26 | 2093.2976 | 2   | 5.147  | 36.8% |
|   | <a href="#">SmEgg303.02304.02304.2</a> | 2.8445 | 0.2321 | 99.8%  | 1212.6  | 1212.4064 | 23  | 4.902  | 72.2% |
|   | <a href="#">SmEgg103.03930.03930.2</a> | 4.8744 | 0.4232 | 100.0% | 2551.87 | 2551.791  | 1   | 8.235  | 47.7% |
|   | <a href="#">SmEgg303.03259.03259.2</a> | 2.8698 | 0.1997 | 97.8%  | 1849.68 | 1850.0758 | 4   | 4.238  | 43.8% |
|   | <a href="#">SmEgg202.02995.02995.2</a> | 4.7166 | 0.2416 | 99.9%  | 1791.55 | 1791.9554 | 1   | 6.188  | 70.0% |
|   | <a href="#">SmEgg102.02895.02895.2</a> | 3.5329 | 0.2409 | 99.8%  | 1412.71 | 1412.5858 | 1   | 5.105  | 75.0% |
| 2 | <a href="#">SmEgg205.03694.03694.2</a> | 3.9335 | 0.326  | 99.9%  | 2145.49 | 2145.4036 | 1   | 6.613  | 55.6% |
|   | <a href="#">SmEgg202.03696.03696.2</a> | 4.9794 | 0.4081 | 100.0% | 2200.04 | 2200.4712 | 1   | 7.688  | 50.0% |
|   | <a href="#">SmEgg102.02097.02097.1</a> | 2.3993 | 0.2703 | 100.0% | 1161.62 | 1162.3868 | 1   | 5.449  | 65.0% |
|   | <a href="#">SmEgg306.02298.02298.2</a> | 3.0965 | 0.2878 | 99.8%  | 1445.67 | 1445.7043 | 1   | 5.241  | 90.9% |

Similarities: [TC20518|1|43-428](#)(20:5)

**U TC31128|1|11-117** 8 38 **55.6%** 117 13035 9.8  
homologue to UP|Q86EU4\_SCHJA (Q86EU4)  
Clone ZZD1418 mRNA sequence, complete

|   | Filename                               | XCorr  | DeltCN | Conf%  | ObsM+H+ | CalcM+H+  | SpR | ZScore | Ion%  |
|---|----------------------------------------|--------|--------|--------|---------|-----------|-----|--------|-------|
| * | <a href="#">SmEgg106.02717.02717.2</a> | 3.095  | 0.2318 | 99.8%  | 1117.27 | 1117.2932 | 6   | 4.905  | 80.0% |
| * | <a href="#">SmEgg203.02082.02082.2</a> | 4.4282 | 0.5249 | 100.0% | 1642.77 | 1643.7936 | 1   | 8.759  | 63.3% |
|   | <a href="#">SmEgg105.03850.03850.2</a> | 4.9686 | 0.371  | 100.0% | 2081.03 | 2081.3325 | 1   | 7.079  | 62.5% |
|   | <a href="#">SmEgg205.03806.03806.2</a> | 3.7782 | 0.3472 | 99.9%  | 2208.64 | 2209.5066 | 1   | 6.518  | 50.0% |
|   | <a href="#">SmEgg305.02303.02303.2</a> | 3.0617 | 0.3318 | 99.8%  | 1664.57 | 1664.942  | 1   | 6.182  | 57.7% |
|   | <a href="#">SmEgg404.02115.02115.1</a> | 1.7558 | 0.2568 | 96.5%  | 1467.55 | 1468.6066 | 4   | 4.39   | 50.0% |
|   | <a href="#">SmEgg106.02464.02464.2</a> | 3.2463 | 0.2107 | 99.8%  | 1581.29 | 1581.7661 | 2   | 4.497  | 66.7% |
|   | <a href="#">SmEgg202.02585.02585.2</a> | 3.2452 | 0.0582 | 96.8%  | 1453.15 | 1453.592  | 8   | 3.127  | 63.6% |

**U TC23427|2|20-100** 4 8 **54.3%** 81 9350 6.8  
similar to UP|DYL1\_CAEEL (Q22799) Dynein  
light chain 1, cytoplasmic, partial (96%)

**U TC33640|3|16-110** 4 8 **46.3%** 95 11075 7.5  
similar to UP|Q6DEU5\_XENTR (Q6DEU5)  
MGC89636 protein (Dynein light chain 2),  
complete

|  | Filename                               | XCorr  | DeltCN | Conf%  | ObsM+H+ | CalcM+H+  | SpR | ZScore | Ion%  | # |
|--|----------------------------------------|--------|--------|--------|---------|-----------|-----|--------|-------|---|
|  | <a href="#">SmEgg202.03011.03011.2</a> | 5.056  | 0.3028 | 100.0% | 2427.61 | 2427.5398 | 1   | 8.28   | 61.9% | 2 |
|  | <a href="#">SmEgg206.02322.02322.2</a> | 2.9922 | 0.2956 | 99.8%  | 1403.36 | 1403.5493 | 1   | 4.977  | 70.0% | 1 |

|                                        |       |        |       |         |          |   |       |       |   |
|----------------------------------------|-------|--------|-------|---------|----------|---|-------|-------|---|
| <a href="#">SmEgg104.01906.01906.1</a> | 2.314 | 0.1918 | 96.8% | 1282.55 | 1283.383 | 1 | 4.43  | 55.0% | 3 |
| <a href="#">SmEgg104.01907.01907.2</a> | 3.026 | 0.2775 | 99.8% | 1283.41 | 1283.383 | 1 | 5.564 | 70.0% | 2 |

Similarities: [TC20533|3|20-107](#)(3:1)[TC29554|3|17-105](#)(2:2)

| U <b>TC33404 2 1-299</b> 33 77 <b>54.2%</b> 299 33678 6.3 UPIP40_SCHMA (P12812) Major egg antigen (p40), partial (78%) |        |        |        |         |           |     |        |       |  |
|------------------------------------------------------------------------------------------------------------------------|--------|--------|--------|---------|-----------|-----|--------|-------|--|
| Filename                                                                                                               | XCorr  | DeltCN | Conf%  | ObsM+H+ | CalcM+H+  | SpR | ZScore | Ion%  |  |
| <a href="#">SmEgg105.02499.02499.1</a>                                                                                 | 3.0986 | 0.394  | 100.0% | 1432.74 | 1433.5668 | 2   | 6.77   | 53.8% |  |
| <a href="#">SmEgg205.02609.02609.2</a>                                                                                 | 4.1103 | 0.3585 | 100.0% | 1433.52 | 1433.5668 | 1   | 7.215  | 73.1% |  |
| <a href="#">SmEgg202.04399.04399.2</a>                                                                                 | 3.7932 | 0.4167 | 100.0% | 2768.92 | 2769.9402 | 1   | 6.971  | 47.8% |  |
| <a href="#">SmEgg402.04495.04495.2</a>                                                                                 | 2.3402 | 0.2659 | 96.0%  | 2283.3  | 2284.3972 | 1   | 5.185  | 36.8% |  |
| <a href="#">SmEgg102.04282.04282.2</a>                                                                                 | 2.8276 | 0.2516 | 99.0%  | 2596.87 | 2598.7844 | 1   | 5.844  | 40.5% |  |
| <a href="#">SmEgg102.04245.04245.2</a>                                                                                 | 3.5619 | 0.1216 | 99.0%  | 2514.69 | 2511.7063 | 1   | 4.383  | 40.0% |  |
| <a href="#">SmEgg202.04267.04267.2</a>                                                                                 | 4.1179 | 0.2882 | 99.9%  | 2398.46 | 2398.5469 | 1   | 6.486  | 50.0% |  |
| <a href="#">SmEgg202.04395.04395.2</a>                                                                                 | 3.8353 | 0.2662 | 99.8%  | 2327.55 | 2327.468  | 1   | 5.735  | 44.4% |  |
| <a href="#">SmEgg202.04177.04177.2</a>                                                                                 | 2.9424 | 0.2926 | 99.8%  | 2229.65 | 2230.3513 | 1   | 5.583  | 52.9% |  |
| <a href="#">SmEgg102.03992.03992.2</a>                                                                                 | 3.7226 | 0.3728 | 100.0% | 2066.33 | 2067.1755 | 1   | 6.555  | 62.5% |  |
| <a href="#">SmEgg104.04278.04278.2</a>                                                                                 | 3.2333 | 0.231  | 99.7%  | 1884.41 | 1885.1699 | 2   | 4.997  | 53.1% |  |
| <a href="#">SmEgg102.02998.02998.2</a>                                                                                 | 3.8934 | 0.3028 | 99.9%  | 1768.71 | 1767.9917 | 1   | 6.825  | 59.4% |  |
| <a href="#">SmEgg202.02899.02899.1</a>                                                                                 | 2.0689 | 0.2493 | 99.3%  | 1491.67 | 1492.669  | 3   | 5.146  | 50.0% |  |
| <a href="#">SmEgg202.02901.02901.2</a>                                                                                 | 3.3894 | 0.2469 | 99.8%  | 1492.44 | 1492.669  | 1   | 5.485  | 84.6% |  |
| <a href="#">SmEgg102.03008.03008.1</a>                                                                                 | 2.7469 | 0.2249 | 100.0% | 1164.55 | 1165.2883 | 1   | 5.378  | 60.0% |  |
| <a href="#">SmEgg304.02663.02663.2</a>                                                                                 | 3.8855 | 0.3852 | 100.0% | 2097.26 | 2098.3196 | 7   | 6.651  | 44.1% |  |
| 2 <a href="#">SmEgg102.01517.01517.1</a>                                                                               | 2.6322 | 0.2314 | 100.0% | 1082.4  | 1083.0967 | 1   | 5.638  | 66.7% |  |
| <a href="#">SmEgg302.01594.01594.1</a>                                                                                 | 2.2961 | 0.2719 | 100.0% | 1203.57 | 1204.2816 | 1   | 5.308  | 60.0% |  |
| <a href="#">SmEgg303.01849.01849.2</a>                                                                                 | 2.9336 | 0.3298 | 99.8%  | 1478.83 | 1479.6323 | 1   | 6.108  | 66.7% |  |
| <a href="#">SmEgg104.02586.02586.2</a>                                                                                 | 3.8318 | 0.3077 | 99.9%  | 2352.81 | 2352.5254 | 1   | 6.773  | 47.5% |  |
| <a href="#">SmEgg102.02547.02547.2</a>                                                                                 | 4.7383 | 0.4601 | 100.0% | 2096.63 | 2097.2053 | 1   | 7.751  | 61.1% |  |
| <a href="#">SmEgg303.00958.00958.2</a>                                                                                 | 2.1614 | 0.2289 | 95.7%  | 1029.13 | 1029.0977 | 39  | 5.176  | 75.0% |  |
| <a href="#">SmEgg404.02370.02370.1</a>                                                                                 | 2.5633 | 0.2746 | 100.0% | 1470.65 | 1471.694  | 1   | 5.483  | 62.5% |  |
| <a href="#">SmEgg304.02016.02016.2</a>                                                                                 | 3.3028 | 0.1932 | 99.7%  | 1470.83 | 1471.694  | 7   | 4.822  | 66.7% |  |
| <a href="#">SmEgg304.02026.02026.2</a>                                                                                 | 3.28   | 0.2744 | 99.8%  | 1631.68 | 1631.8328 | 1   | 5.227  | 65.4% |  |
| <a href="#">SmEgg305.02159.02159.2</a>                                                                                 | 3.0241 | 0.3    | 99.7%  | 1787.7  | 1788.0203 | 1   | 5.404  | 60.7% |  |
| <a href="#">SmEgg202.02911.02911.2</a>                                                                                 | 4.9534 | 0.0587 | 99.8%  | 1519.41 | 1519.8115 | 1   | 7.245  | 84.6% |  |
| <a href="#">SmEgg202.03039.03039.2</a>                                                                                 | 4.6944 | 0.1264 | 99.8%  | 2189.95 | 2191.4763 | 1   | 7.413  | 60.5% |  |
| <a href="#">SmEgg203.01996.01996.1</a>                                                                                 | 3.873  | 0.4204 | 100.0% | 1447.52 | 1448.5321 | 1   | 7.957  | 64.3% |  |
| <a href="#">SmEgg103.01930.01930.2</a>                                                                                 | 3.879  | 0.3107 | 99.9%  | 1448.48 | 1448.5321 | 1   | 7.485  | 64.3% |  |
| <a href="#">SmEgg105.02141.02141.2</a>                                                                                 | 2.519  | 0.2332 | 96.4%  | 1601.82 | 1604.7196 | 1   | 4.859  | 56.7% |  |
| <a href="#">SmEgg202.01826.01826.1</a>                                                                                 | 1.8907 | 0.2991 | 99.5%  | 1097.47 | 1098.1547 | 8   | 5.248  | 55.0% |  |
| <a href="#">SmEgg302.01026.01026.2</a>                                                                                 | 2.724  | 0.1797 | 98.1%  | 1141.2  | 1141.1826 | 42  | 5.113  | 60.0% |  |

Similarities: [TC28682|2|17-340](#)(31:2)[TC24053|1|188-403](#)(14:19)[TC24393|3|22-281](#)(26:7)

| U <b>TC23834 1 1-224</b> 21 74 <b>54.0%</b> 224 26113 6.4 UPI GST27_SCHMA (P35661) Glutathione S-transferase 26 kDa (GST 26) (SM26/2 antigen) (GST class-mu) , complete |        |        |        |         |           |     |        |       |  |
|-------------------------------------------------------------------------------------------------------------------------------------------------------------------------|--------|--------|--------|---------|-----------|-----|--------|-------|--|
| Filename                                                                                                                                                                | XCorr  | DeltCN | Conf%  | ObsM+H+ | CalcM+H+  | SpR | ZScore | Ion%  |  |
| * <a href="#">SmEgg203.03662.03662.2</a>                                                                                                                                | 4.3437 | 0.2701 | 100.0% | 1598.61 | 1598.793  | 1   | 5.644  | 79.2% |  |
| * <a href="#">SmEgg103.02055.02055.2</a>                                                                                                                                | 2.7902 | 0.2227 | 99.5%  | 1409.45 | 1409.5009 | 9   | 4.485  | 65.0% |  |
| * <a href="#">SmEgg103.02051.02051.1</a>                                                                                                                                | 2.226  | 0.1781 | 95.2%  | 1409.67 | 1409.5009 | 3   | 4.652  | 55.0% |  |
| * <a href="#">SmEgg103.03945.03945.2</a>                                                                                                                                | 3.6003 | 0.3027 | 99.8%  | 1939.72 | 1940.2029 | 1   | 5.605  | 59.4% |  |
| * <a href="#">SmEgg303.03847.03847.2</a>                                                                                                                                | 3.6341 | 0.3623 | 99.9%  | 2040.91 | 2041.308  | 1   | 6.184  | 52.9% |  |
| * <a href="#">SmEgg303.03787.03787.2</a>                                                                                                                                | 4.3197 | 0.2896 | 99.9%  | 2169.77 | 2169.4387 | 1   | 7.529  | 55.6% |  |
| * <a href="#">SmEgg303.03599.03599.2</a>                                                                                                                                | 3.0081 | 0.2554 | 99.6%  | 1870.31 | 1871.0967 | 1   | 5.239  | 60.0% |  |
| * <a href="#">SmEgg303.03519.03519.2</a>                                                                                                                                | 3.0029 | 0.26   | 99.7%  | 1999.1  | 1999.2274 | 1   | 4.939  | 53.1% |  |

|    |                                        |        |        |        |         |            |    |       |       |
|----|----------------------------------------|--------|--------|--------|---------|------------|----|-------|-------|
| *  | <a href="#">SmEgg103.03962.03962.1</a> | 2.7178 | 0.2811 | 100.0% | 1394.63 | 1394.567   | 2  | 5.501 | 54.5% |
| *  | <a href="#">SmEgg202.04031.04031.1</a> | 2.4778 | 0.1411 | 95.0%  | 1069.48 | 1070.187   | 1  | 4.609 | 68.8% |
| *2 | <a href="#">SmEgg203.02279.02279.2</a> | 2.7075 | 0.1081 | 96.9%  | 1032.88 | 1033.2744  | 2  | 4.211 | 81.2% |
| *  | <a href="#">SmEgg105.02013.02013.1</a> | 2.6113 | 0.3546 | 100.0% | 1013.43 | 1014.15356 | 1  | 5.622 | 75.0% |
| *  | <a href="#">SmEgg205.02113.02113.2</a> | 2.5679 | 0.1839 | 98.4%  | 1014.24 | 1014.15356 | 2  | 4.549 | 87.5% |
| *  | <a href="#">SmEgg104.04071.04071.2</a> | 2.9205 | 0.1529 | 96.4%  | 2125.54 | 2123.5151  | 2  | 4.285 | 41.2% |
| *  | <a href="#">SmEgg103.03619.03619.2</a> | 3.9037 | 0.1498 | 99.8%  | 1375.45 | 1375.6691  | 15 | 3.974 | 72.7% |
| *  | <a href="#">SmEgg204.01784.01784.1</a> | 2.8403 | 0.2972 | 100.0% | 1261.64 | 1262.3647  | 2  | 5.833 | 55.0% |
| *  | <a href="#">SmEgg104.01716.01716.2</a> | 2.9371 | 0.18   | 99.2%  | 1262.27 | 1262.3647  | 2  | 4.464 | 70.0% |
| *  | <a href="#">SmEgg306.02874.02874.2</a> | 2.8521 | 0.308  | 99.8%  | 1826.32 | 1826.1268  | 2  | 5.113 | 53.6% |
| *  | <a href="#">SmEgg304.03535.03535.2</a> | 2.8093 | 0.2228 | 99.5%  | 1354.33 | 1354.5548  | 3  | 4.553 | 65.0% |
| *  | <a href="#">SmEgg206.02843.02843.2</a> | 4.9045 | 0.3743 | 100.0% | 1872.64 | 1873.0776  | 1  | 7.448 | 61.8% |
| *  | <a href="#">SmEgg302.01599.01599.2</a> | 2.6834 | 0.2096 | 98.2%  | 1105.02 | 1105.1925  | 2  | 4.887 | 77.3% |

[U TC27226|2|31-145](#) 5 18 [53.9%](#) 115 12116 9.8 similar to UP|Q5D9T1\_SCHJA (Q5D9T1)  
SJCHGC06124 protein, partial (31%)

|  | Filename                               | XCorr  | DeltCN | Conf%  | ObsM+H+ | CalcM+H+  | SpR | ZScore | Ion%  | # |
|--|----------------------------------------|--------|--------|--------|---------|-----------|-----|--------|-------|---|
|  | <a href="#">SmEgg106.03120.03120.2</a> | 5.135  | 0.4084 | 100.0% | 1793.8  | 1794.1881 | 1   | 7.644  | 66.7% | 9 |
|  | <a href="#">SmEgg105.03467.03467.2</a> | 3.9383 | 0.3534 | 100.0% | 1897.56 | 1897.2249 | 1   | 6.262  | 53.1% | 5 |
|  | <a href="#">SmEgg404.03210.03210.1</a> | 3.2518 | 0.4656 | 100.0% | 1495.68 | 1496.6263 | 1   | 8.222  | 53.6% | 2 |
|  | <a href="#">SmEgg304.02714.02714.2</a> | 2.941  | 0.3064 | 99.8%  | 1496.01 | 1496.6263 | 3   | 5.424  | 57.1% | 1 |
|  | <a href="#">SmEgg105.03607.03607.2</a> | 2.9772 | 0.2027 | 98.6%  | 2435.03 | 2436.8384 | 1   | 4.843  | 37.0% | 1 |

Similarities: [TC23687|3|33-357\(4:1\)](#)

[U TC24300|3|5-138](#) 6 9 [53.7%](#) 134 14968 8.3 UP|Q7Z114\_SCHJA (Q7Z114) Beta-tubulin, partial  
(97%)

|   | Filename                               | XCorr  | DeltCN | Conf% | ObsM+H+ | CalcM+H+  | SpR | ZScore | Ion%  | # |
|---|----------------------------------------|--------|--------|-------|---------|-----------|-----|--------|-------|---|
|   | <a href="#">SmEgg303.02848.02848.2</a> | 3.5916 | 0.3436 | 99.9% | 2275.77 | 2276.3801 | 7   | 6.592  | 36.8% | 2 |
|   | <a href="#">SmEgg203.03238.03238.3</a> | 4.0519 | 0.2805 | 99.3% | 3118.31 | 3118.2996 | 1   | 5.537  | 27.9% | 1 |
|   | <a href="#">SmEgg304.03408.03408.3</a> | 3.7291 | 0.2245 | 95.1% | 3608.68 | 3607.8713 | 1   | 4.823  | 25.0% | 1 |
|   | <a href="#">SmEgg202.02993.02993.2</a> | 3.5133 | 0.2538 | 99.8% | 1617.45 | 1616.8701 | 1   | 4.619  | 71.4% | 2 |
|   | <a href="#">SmEgg303.03500.03500.2</a> | 3.6035 | 0.2891 | 99.8% | 1988.66 | 1989.2941 | 1   | 6.012  | 47.2% | 1 |
| 2 | <a href="#">SmEgg206.02739.02739.2</a> | 3.8062 | 0.3411 | 99.9% | 2413.04 | 2411.6414 | 1   | 5.798  | 42.9% | 2 |

Similarities: [TC33456|4|1-129\(2:4\)](#)

[TC31619|2|3-448\(3:3\)](#)

[U TC24393|3|22-281](#) 27 66 [52.7%](#) 260 29775 7.6 UP|P40\_SCHMA (P12812) Major egg  
antigen (p40), partial (86%)

|   | Filename                               | XCorr  | DeltCN | Conf%  | ObsM+H+ | CalcM+H+  | SpR | ZScore | Ion%  |
|---|----------------------------------------|--------|--------|--------|---------|-----------|-----|--------|-------|
| * | <a href="#">SmEgg205.02213.02213.2</a> | 2.4992 | 0.25   | 98.6%  | 1235.51 | 1235.3884 | 1   | 5.94   | 70.0% |
|   | <a href="#">SmEgg105.02499.02499.1</a> | 3.0986 | 0.394  | 100.0% | 1432.74 | 1433.5668 | 2   | 6.77   | 53.8% |
|   | <a href="#">SmEgg205.02609.02609.2</a> | 4.1103 | 0.3585 | 100.0% | 1433.52 | 1433.5668 | 1   | 7.215  | 73.1% |
|   | <a href="#">SmEgg202.04399.04399.2</a> | 3.7932 | 0.4167 | 100.0% | 2768.92 | 2769.9402 | 1   | 6.971  | 47.8% |
|   | <a href="#">SmEgg402.04495.04495.2</a> | 2.3402 | 0.2659 | 96.0%  | 2283.3  | 2284.3972 | 1   | 5.185  | 36.8% |
|   | <a href="#">SmEgg102.04282.04282.2</a> | 2.8276 | 0.2516 | 99.0%  | 2596.87 | 2598.7844 | 1   | 5.844  | 40.5% |
|   | <a href="#">SmEgg102.04245.04245.2</a> | 3.5619 | 0.1216 | 99.0%  | 2514.69 | 2511.7063 | 1   | 4.383  | 40.0% |
|   | <a href="#">SmEgg202.04267.04267.2</a> | 4.1179 | 0.2882 | 99.9%  | 2398.46 | 2398.5469 | 1   | 6.486  | 50.0% |
|   | <a href="#">SmEgg202.04395.04395.2</a> | 3.8353 | 0.2662 | 99.8%  | 2327.55 | 2327.468  | 1   | 5.735  | 44.4% |
|   | <a href="#">SmEgg202.04177.04177.2</a> | 2.9424 | 0.2926 | 99.8%  | 2229.65 | 2230.3513 | 1   | 5.583  | 52.9% |
|   | <a href="#">SmEgg102.03992.03992.2</a> | 3.7226 | 0.3728 | 100.0% | 2066.33 | 2067.1755 | 1   | 6.555  | 62.5% |
|   | <a href="#">SmEgg104.04278.04278.2</a> | 3.2333 | 0.231  | 99.7%  | 1884.41 | 1885.1699 | 2   | 4.997  | 53.1% |
|   | <a href="#">SmEgg102.02998.02998.2</a> | 3.8934 | 0.3028 | 99.9%  | 1768.71 | 1767.9917 | 1   | 6.825  | 59.4% |
|   | <a href="#">SmEgg202.02899.02899.1</a> | 2.0689 | 0.2493 | 99.3%  | 1491.67 | 1492.669  | 3   | 5.146  | 50.0% |
|   | <a href="#">SmEgg202.02901.02901.2</a> | 3.3894 | 0.2469 | 99.8%  | 1492.44 | 1492.669  | 1   | 5.485  | 84.6% |
|   | <a href="#">SmEgg102.03008.03008.1</a> | 2.7469 | 0.2249 | 100.0% | 1164.55 | 1165.2883 | 1   | 5.378  | 60.0% |
|   | <a href="#">SmEgg304.02663.02663.2</a> | 3.8855 | 0.3852 | 100.0% | 2097.26 | 2098.3196 | 7   | 6.651  | 44.1% |

|   |                                        |        |        |        |         |           |    |       |       |
|---|----------------------------------------|--------|--------|--------|---------|-----------|----|-------|-------|
| 2 | <a href="#">SmEgg102.01517.01517.1</a> | 2.6322 | 0.2314 | 100.0% | 1082.4  | 1083.0967 | 1  | 5.638 | 66.7% |
|   | <a href="#">SmEgg302.01594.01594.1</a> | 2.2961 | 0.2719 | 100.0% | 1203.57 | 1204.2816 | 1  | 5.308 | 60.0% |
|   | <a href="#">SmEgg303.01849.01849.2</a> | 2.9336 | 0.3298 | 99.8%  | 1478.83 | 1479.6323 | 1  | 6.108 | 66.7% |
|   | <a href="#">SmEgg104.02586.02586.2</a> | 3.8318 | 0.3077 | 99.9%  | 2352.81 | 2352.5254 | 1  | 6.773 | 47.5% |
|   | <a href="#">SmEgg102.02547.02547.2</a> | 4.7383 | 0.4601 | 100.0% | 2096.63 | 2097.2053 | 1  | 7.751 | 61.1% |
|   | <a href="#">SmEgg303.00958.00958.2</a> | 2.1614 | 0.2289 | 95.7%  | 1029.13 | 1029.0977 | 39 | 5.176 | 75.0% |
|   | <a href="#">SmEgg404.02370.02370.1</a> | 2.5633 | 0.2746 | 100.0% | 1470.65 | 1471.694  | 1  | 5.483 | 62.5% |
|   | <a href="#">SmEgg304.02016.02016.2</a> | 3.3028 | 0.1932 | 99.7%  | 1470.83 | 1471.694  | 7  | 4.822 | 66.7% |
|   | <a href="#">SmEgg304.02026.02026.2</a> | 3.28   | 0.2744 | 99.8%  | 1631.68 | 1631.8328 | 1  | 5.227 | 65.4% |
|   | <a href="#">SmEgg305.02159.02159.2</a> | 3.0241 | 0.3    | 99.7%  | 1787.7  | 1788.0203 | 1  | 5.404 | 60.7% |

Similarities: [TC28682|17-340\(24:3\)](#)[TC24053|1188-403\(7:20\)](#)[TC33404|1-299\(26:1\)](#)

|   |                                        |        |        |        |         |           |     |        |        | UPI GST28_SCHMA (P09792) Glutathione S-transferase 28 kDa (GST 28) (SM28 antigen) (Protective 28 kDa antigen) (GST class-mu) , complete |  |  |  |
|---|----------------------------------------|--------|--------|--------|---------|-----------|-----|--------|--------|-----------------------------------------------------------------------------------------------------------------------------------------|--|--|--|
| U | TC31264 3 1-217                        | 17     | 48     | 52.5%  | 217     | 24551     | 8.0 |        |        |                                                                                                                                         |  |  |  |
|   | Filename                               | XCorr  | DeltCN | Conf%  | ObsM+H+ | CalcM+H+  | SpR | ZScore | Ion%   |                                                                                                                                         |  |  |  |
|   | <a href="#">SmEgg104.00663.00663.2</a> | 3.023  | 0.2652 | 99.8%  | 1007.63 | 1008.0788 | 1   | 5.572  | 93.8%  |                                                                                                                                         |  |  |  |
|   | <a href="#">SmEgg204.03444.03444.2</a> | 3.7532 | 0.1124 | 99.8%  | 1190.03 | 1190.446  | 1   | 4.857  | 100.0% |                                                                                                                                         |  |  |  |
|   | <a href="#">SmEgg106.02246.02246.2</a> | 3.7437 | 0.3361 | 99.9%  | 1985.41 | 1986.1348 | 1   | 7.449  | 66.7%  |                                                                                                                                         |  |  |  |
|   | <a href="#">SmEgg103.01951.01951.2</a> | 4.196  | 0.3085 | 100.0% | 1668.21 | 1668.8033 | 1   | 6.638  | 65.4%  |                                                                                                                                         |  |  |  |
| * | <a href="#">SmEgg106.03241.03241.1</a> | 2.6485 | 0.1465 | 95.9%  | 1515.64 | 1516.8457 | 8   | 4.049  | 58.3%  |                                                                                                                                         |  |  |  |
| * | <a href="#">SmEgg105.03827.03827.2</a> | 3.5485 | 0.1707 | 99.8%  | 1516.8  | 1516.8457 | 1   | 3.933  | 66.7%  |                                                                                                                                         |  |  |  |
| * | <a href="#">SmEgg205.00648.00648.2</a> | 3.602  | 0.2336 | 99.8%  | 1417.07 | 1417.7131 | 1   | 4.773  | 77.3%  |                                                                                                                                         |  |  |  |
| * | <a href="#">SmEgg304.01758.01758.1</a> | 2.96   | 0.3006 | 100.0% | 1292.57 | 1293.4694 | 1   | 5.898  | 68.2%  |                                                                                                                                         |  |  |  |
| * | <a href="#">SmEgg304.01760.01760.2</a> | 3.3253 | 0.2437 | 99.8%  | 1292.8  | 1293.4694 | 3   | 5.671  | 72.7%  |                                                                                                                                         |  |  |  |
|   | <a href="#">SmEgg206.03906.03906.2</a> | 4.7285 | 0.3996 | 100.0% | 2163.62 | 2164.5474 | 1   | 7.57   | 55.3%  |                                                                                                                                         |  |  |  |
|   | <a href="#">SmEgg206.03838.03838.3</a> | 3.9783 | 0.1992 | 99.5%  | 2163.77 | 2164.5474 | 2   | 5.349  | 40.8%  |                                                                                                                                         |  |  |  |
|   | <a href="#">SmEgg303.02561.02561.1</a> | 3.7464 | 0.3552 | 100.0% | 1572.77 | 1573.7863 | 1   | 7.11   | 65.4%  |                                                                                                                                         |  |  |  |
|   | <a href="#">SmEgg303.02559.02559.2</a> | 3.3763 | 0.2379 | 99.8%  | 1573.35 | 1573.7863 | 1   | 5.887  | 69.2%  |                                                                                                                                         |  |  |  |
|   | <a href="#">SmEgg303.02616.02616.2</a> | 3.7114 | 0.2525 | 99.8%  | 1630.64 | 1630.8381 | 1   | 6.476  | 53.6%  |                                                                                                                                         |  |  |  |
|   | <a href="#">SmEgg106.02145.02145.2</a> | 3.0066 | 0.2434 | 99.7%  | 1280.62 | 1280.4293 | 1   | 5.376  | 80.0%  |                                                                                                                                         |  |  |  |
|   | <a href="#">SmEgg205.02489.02489.2</a> | 3.1976 | 0.2227 | 99.8%  | 1165.82 | 1166.3219 | 1   | 4.58   | 94.4%  |                                                                                                                                         |  |  |  |
|   | <a href="#">SmEgg305.02131.02131.2</a> | 2.4577 | 0.1915 | 97.6%  | 1003.43 | 1003.146  | 6   | 4.465  | 87.5%  |                                                                                                                                         |  |  |  |

|   |                                        |        |        |        |         |           |     |        |       | UPI ACT1_SCHMA (P53470) Actin-1, complete |  |  |  |
|---|----------------------------------------|--------|--------|--------|---------|-----------|-----|--------|-------|-------------------------------------------|--|--|--|
| U | TC20518 1 43-428                       | 25     | 46     | 52.1%  | 386     | 42698     | 5.5 |        |       |                                           |  |  |  |
|   | Filename                               | XCorr  | DeltCN | Conf%  | ObsM+H+ | CalcM+H+  | SpR | ZScore | Ion%  |                                           |  |  |  |
|   | <a href="#">SmEgg202.01774.01774.1</a> | 2.0286 | 0.2247 | 96.7%  | 976.47  | 977.02136 | 1   | 5.112  | 66.7% |                                           |  |  |  |
|   | <a href="#">SmEgg205.02209.02209.1</a> | 2.7514 | 0.2612 | 100.0% | 1171.51 | 1172.4058 | 1   | 4.667  | 65.0% |                                           |  |  |  |
|   | <a href="#">SmEgg205.02211.02211.2</a> | 3.0693 | 0.227  | 99.7%  | 1172.39 | 1172.4058 | 1   | 5.314  | 80.0% |                                           |  |  |  |
|   | <a href="#">SmEgg304.01858.01858.2</a> | 3.5916 | 0.2828 | 99.8%  | 1952.76 | 1952.1313 | 1   | 6.628  | 50.0% |                                           |  |  |  |
|   | <a href="#">SmEgg304.02215.02215.2</a> | 3.6091 | 0.3454 | 99.9%  | 2165.91 | 2166.3958 | 1   | 5.841  | 47.4% |                                           |  |  |  |
|   | <a href="#">SmEgg202.01542.01542.1</a> | 3.1705 | 0.346  | 100.0% | 1198.52 | 1199.2163 | 1   | 6.827  | 70.0% |                                           |  |  |  |
|   | <a href="#">SmEgg202.01565.01565.2</a> | 3.0669 | 0.2362 | 99.7%  | 1199.27 | 1199.2163 | 2   | 5.186  | 80.0% |                                           |  |  |  |
|   | <a href="#">SmEgg304.02386.02386.2</a> | 2.6965 | 0.291  | 99.3%  | 1737.77 | 1737.9506 | 5   | 5.877  | 50.0% |                                           |  |  |  |
|   | <a href="#">SmEgg305.02804.02804.2</a> | 3.1836 | 0.2502 | 99.8%  | 1510.42 | 1511.6544 | 1   | 5.687  | 85.0% |                                           |  |  |  |
|   | <a href="#">SmEgg203.02518.02518.2</a> | 4.0687 | 0.3964 | 100.0% | 1954.79 | 1955.2615 | 1   | 7.19   | 64.7% |                                           |  |  |  |
|   | <a href="#">SmEgg104.02419.02419.2</a> | 3.8852 | 0.2216 | 99.8%  | 1784.57 | 1785.0502 | 1   | 5.996  | 66.7% |                                           |  |  |  |
|   | <a href="#">SmEgg304.02752.02752.2</a> | 2.6997 | 0.1799 | 95.7%  | 2507.96 | 2508.747  | 39  | 4.141  | 30.4% |                                           |  |  |  |
|   | <a href="#">SmEgg205.03457.03457.3</a> | 4.5735 | 0.3607 | 100.0% | 3167.46 | 3167.5889 | 1   | 5.664  | 25.9% |                                           |  |  |  |
|   | <a href="#">SmEgg205.03427.03427.2</a> | 3.4224 | 0.2611 | 99.8%  | 3167.65 | 3167.5889 | 9   | 5.099  | 25.9% |                                           |  |  |  |
| 2 | <a href="#">SmEgg302.01903.01903.1</a> | 2.5855 | 0.1978 | 99.3%  | 1169.52 | 1170.2645 | 34  | 4.631  | 59.1% |                                           |  |  |  |
|   | <a href="#">SmEgg303.02939.02939.2</a> | 2.7348 | 0.2468 | 98.6%  | 2092.26 | 2093.2976 | 2   | 5.147  | 36.8% |                                           |  |  |  |

|   |                                        |        |        |        |         |           |   |       |       |
|---|----------------------------------------|--------|--------|--------|---------|-----------|---|-------|-------|
|   | <a href="#">SmEgg202.03720.03720.2</a> | 5.2967 | 0.3934 | 100.0% | 2522.34 | 2521.7646 | 1 | 8.219 | 59.1% |
|   | <a href="#">SmEgg303.03248.03248.2</a> | 2.7782 | 0.1547 | 95.2%  | 1834.2  | 1834.0764 | 4 | 4.4   | 43.8% |
|   | <a href="#">SmEgg202.02995.02995.2</a> | 4.7166 | 0.2416 | 99.9%  | 1791.55 | 1791.9554 | 1 | 6.188 | 70.0% |
|   | <a href="#">SmEgg102.02895.02895.2</a> | 3.5329 | 0.2409 | 99.8%  | 1412.71 | 1412.5858 | 1 | 5.105 | 75.0% |
| 2 | <a href="#">SmEgg205.03694.03694.2</a> | 3.9335 | 0.326  | 99.9%  | 2145.49 | 2145.4036 | 1 | 6.613 | 55.6% |
|   | <a href="#">SmEgg204.03874.03874.3</a> | 4.0347 | 0.381  | 100.0% | 3160.35 | 3160.5498 | 1 | 6.249 | 30.6% |
|   | <a href="#">SmEgg204.03881.03881.2</a> | 2.5781 | 0.2228 | 96.4%  | 3160.45 | 3160.5498 | 1 | 5.734 | 33.3% |
|   | <a href="#">SmEgg102.03064.03064.2</a> | 4.1435 | 0.3122 | 99.9%  | 2217.71 | 2218.443  | 1 | 6.853 | 45.0% |
|   | <a href="#">SmEgg306.02298.02298.2</a> | 3.0965 | 0.2878 | 99.8%  | 1445.67 | 1445.7043 | 1 | 5.241 | 90.9% |

Similarities: [TC32093|3|19-397](#)(20:5)

| U <b>TC20283 1 12-493</b> 27 54 <b>51.5%</b> 482 53938 6.7 UP ERP60_SCHMA (P38658) Probable protein disulfide-isomerase ER-60 precursor (ERP60) , complete |                                        |        |        |        |         |           |     |        |       |
|------------------------------------------------------------------------------------------------------------------------------------------------------------|----------------------------------------|--------|--------|--------|---------|-----------|-----|--------|-------|
|                                                                                                                                                            | Filename                               | XCorr  | DeltCN | Conf%  | ObsM+H+ | CalcM+H+  | SpR | ZScore | Ion%  |
|                                                                                                                                                            | <a href="#">SmEgg303.01915.01915.1</a> | 2.2819 | 0.2372 | 99.1%  | 963.57  | 964.1063  | 56  | 4.925  | 62.5% |
|                                                                                                                                                            | <a href="#">SmEgg105.02833.02833.2</a> | 4.5792 | 0.3306 | 100.0% | 1660.88 | 1661.939  | 1   | 7.765  | 80.0% |
|                                                                                                                                                            | <a href="#">SmEgg103.02979.02979.2</a> | 4.2103 | 0.4133 | 100.0% | 1532.5  | 1533.7649 | 1   | 8.062  | 71.4% |
|                                                                                                                                                            | <a href="#">SmEgg202.03128.03128.2</a> | 4.0664 | 0.3313 | 100.0% | 2477.73 | 2479.632  | 1   | 6.431  | 45.2% |
| 2                                                                                                                                                          | <a href="#">SmEgg304.02911.02911.2</a> | 1.9732 | 0.3116 | 97.6%  | 939.17  | 939.1424  | 178 | 4.863  | 64.3% |
| *                                                                                                                                                          | <a href="#">SmEgg203.02434.02434.2</a> | 3.5398 | 0.207  | 99.8%  | 1324.39 | 1324.4973 | 1   | 4.666  | 77.3% |
| *                                                                                                                                                          | <a href="#">SmEgg102.04222.04222.3</a> | 3.7731 | 0.2305 | 97.2%  | 4004.33 | 4002.5286 | 1   | 4.591  | 19.4% |
| *                                                                                                                                                          | <a href="#">SmEgg102.03525.03525.2</a> | 3.7433 | 0.4329 | 100.0% | 2180.19 | 2181.3582 | 1   | 7.547  | 44.7% |
| *                                                                                                                                                          | <a href="#">SmEgg103.03815.03815.2</a> | 3.464  | 0.3211 | 99.8%  | 2625.41 | 2626.9202 | 1   | 6.126  | 32.6% |
| *                                                                                                                                                          | <a href="#">SmEgg302.03006.03006.2</a> | 3.439  | 0.2224 | 99.8%  | 1865.54 | 1866.0319 | 4   | 6.091  | 43.8% |
| *                                                                                                                                                          | <a href="#">SmEgg202.03863.03863.2</a> | 3.7034 | 0.3156 | 99.9%  | 2111.23 | 2111.3562 | 1   | 5.704  | 47.2% |
| *                                                                                                                                                          | <a href="#">SmEgg204.03061.03061.2</a> | 3.8522 | 0.3327 | 99.9%  | 2906.02 | 2906.1218 | 1   | 6.039  | 39.6% |
| *                                                                                                                                                          | <a href="#">SmEgg203.02874.02874.2</a> | 4.2417 | 0.2113 | 99.8%  | 2347.82 | 2348.5713 | 1   | 7.084  | 50.0% |
| *                                                                                                                                                          | <a href="#">SmEgg102.02703.02703.2</a> | 3.1537 | 0.2968 | 99.8%  | 2118.4  | 2119.2922 | 1   | 5.194  | 50.0% |
| *                                                                                                                                                          | <a href="#">SmEgg205.02193.02193.1</a> | 1.9856 | 0.2436 | 99.3%  | 986.59  | 987.1062  | 1   | 5.551  | 68.8% |
| *                                                                                                                                                          | <a href="#">SmEgg105.02102.02102.2</a> | 2.5206 | 0.1199 | 95.2%  | 987.24  | 987.1062  | 9   | 4.275  | 75.0% |
| *                                                                                                                                                          | <a href="#">SmEgg205.02378.02378.1</a> | 2.8429 | 0.1302 | 96.7%  | 954.6   | 955.1857  | 1   | 5.473  | 75.0% |
| *                                                                                                                                                          | <a href="#">SmEgg104.02046.02046.2</a> | 2.4469 | 0.1496 | 95.7%  | 955.29  | 955.1857  | 3   | 4.363  | 81.2% |
| *                                                                                                                                                          | <a href="#">SmEgg202.04029.04029.1</a> | 2.4286 | 0.261  | 100.0% | 1403.62 | 1404.5621 | 1   | 5.44   | 68.2% |
| *                                                                                                                                                          | <a href="#">SmEgg103.03958.03958.2</a> | 4.2284 | 0.2947 | 100.0% | 1404.28 | 1404.5621 | 1   | 5.926  | 86.4% |
| *                                                                                                                                                          | <a href="#">SmEgg204.02286.02286.1</a> | 2.3043 | 0.2808 | 100.0% | 1255.72 | 1256.4441 | 1   | 5.494  | 75.0% |
|                                                                                                                                                            | <a href="#">SmEgg203.03072.03072.2</a> | 5.7254 | 0.4144 | 100.0% | 1874.89 | 1876.1167 | 1   | 8.838  | 73.3% |
|                                                                                                                                                            | <a href="#">SmEgg102.03240.03240.2</a> | 4.8445 | 0.2979 | 100.0% | 1747.66 | 1747.9426 | 1   | 7.937  | 82.1% |
|                                                                                                                                                            | <a href="#">SmEgg304.02223.02223.2</a> | 2.9753 | 0.1533 | 97.8%  | 1494.02 | 1494.7461 | 5   | 4.584  | 66.7% |
|                                                                                                                                                            | <a href="#">SmEgg102.03914.03914.2</a> | 5.0166 | 0.4513 | 100.0% | 2589.22 | 2586.8792 | 1   | 8.676  | 54.3% |
|                                                                                                                                                            | <a href="#">SmEgg204.03242.03242.2</a> | 2.3358 | 0.2188 | 96.7%  | 1168.76 | 1169.4087 | 103 | 4.524  | 66.7% |
|                                                                                                                                                            | <a href="#">SmEgg102.02003.02003.2</a> | 2.8355 | 0.2706 | 99.5%  | 1839.76 | 1838.9689 | 2   | 5.249  | 46.9% |

| U <b>TC36042 2 1-99</b> 4 9 <b>51.5%</b> 99 11335 5.2 weakly similar to UP Q86DY5_SCHJA (Q86DY5) Clone ZZZ427 mRNA sequence, partial (62%) |                                        |        |        |        |         |           |     |        |       |
|--------------------------------------------------------------------------------------------------------------------------------------------|----------------------------------------|--------|--------|--------|---------|-----------|-----|--------|-------|
|                                                                                                                                            | Filename                               | XCorr  | DeltCN | Conf%  | ObsM+H+ | CalcM+H+  | SpR | ZScore | Ion%  |
| *                                                                                                                                          | <a href="#">SmEgg302.03904.03904.2</a> | 3.2495 | 0.2309 | 99.8%  | 1626.82 | 1626.8468 | 1   | 5.833  | 65.4% |
| *                                                                                                                                          | <a href="#">SmEgg303.04303.04303.2</a> | 3.9761 | 0.2528 | 99.8%  | 1757.82 | 1758.0393 | 1   | 6.366  | 71.4% |
| *                                                                                                                                          | <a href="#">SmEgg103.00074.00074.2</a> | 4.002  | 0.4266 | 100.0% | 2910.08 | 2911.2275 | 2   | 7.096  | 38.0% |
| *                                                                                                                                          | <a href="#">SmEgg202.04703.04703.2</a> | 4.9993 | 0.4114 | 100.0% | 1881.79 | 1882.1108 | 1   | 7.758  | 59.4% |

| U <b>TC19794 2 19-299</b> 27 58 <b>50.9%</b> 281 32836 8.0 UP Q2KMJ3_SCHMA (Q2KMJ3) Secretory glycoprotein k5 precursor, complete |                                        |        |        |       |         |           |     |        |       |
|-----------------------------------------------------------------------------------------------------------------------------------|----------------------------------------|--------|--------|-------|---------|-----------|-----|--------|-------|
|                                                                                                                                   | Filename                               | XCorr  | DeltCN | Conf% | ObsM+H+ | CalcM+H+  | SpR | ZScore | Ion%  |
|                                                                                                                                   | <a href="#">SmEgg105.03041.03041.2</a> | 3.8119 | 0.1706 | 99.8% | 1231.34 | 1231.5977 | 1   | 4.446  | 80.0% |
|                                                                                                                                   | <a href="#">SmEgg105.03051.03051.1</a> | 2.6066 | 0.1671 | 97.5% | 1232.69 | 1231.5977 | 1   | 3.92   | 70.0% |

|    |                                        |        |        |        |         |           |    |       |       |
|----|----------------------------------------|--------|--------|--------|---------|-----------|----|-------|-------|
|    | <a href="#">SmEgg306.02358.02358.2</a> | 3.2411 | 0.1939 | 99.4%  | 2170.85 | 2171.476  | 1  | 5.064 | 47.4% |
|    | <a href="#">SmEgg306.02335.02335.2</a> | 3.4492 | 0.3033 | 99.8%  | 2099.7  | 2100.3972 | 1  | 5.411 | 47.2% |
|    | <a href="#">SmEgg306.02266.02266.3</a> | 4.5379 | 0.282  | 100.0% | 1986.32 | 1987.2378 | 1  | 5.917 | 39.7% |
|    | <a href="#">SmEgg306.02264.02264.2</a> | 3.5311 | 0.3418 | 99.9%  | 1988.45 | 1987.2378 | 1  | 6.318 | 47.1% |
|    | <a href="#">SmEgg306.02250.02250.2</a> | 3.586  | 0.2602 | 99.8%  | 1688.63 | 1688.9391 | 2  | 5.767 | 64.3% |
|    | <a href="#">SmEgg104.02111.02111.2</a> | 2.487  | 0.2876 | 99.1%  | 1342.37 | 1342.4943 | 7  | 5.598 | 68.2% |
|    | <a href="#">SmEgg103.02114.02114.2</a> | 2.8176 | 0.173  | 99.0%  | 1094.41 | 1094.2125 | 1  | 4.037 | 88.9% |
|    | <a href="#">SmEgg202.00848.00848.2</a> | 2.7357 | 0.18   | 99.6%  | 985.5   | 986.0263  | 4  | 3.795 | 92.9% |
|    | <a href="#">SmEgg106.02536.02536.2</a> | 3.2574 | 0.1261 | 99.4%  | 1320.56 | 1320.5369 | 1  | 4.331 | 80.0% |
|    | <a href="#">SmEgg105.02867.02867.2</a> | 3.7636 | 0.2667 | 99.9%  | 1192.11 | 1192.3628 | 1  | 5.398 | 88.9% |
|    | <a href="#">SmEgg103.02545.02545.2</a> | 3.2565 | 0.0916 | 98.1%  | 1528.49 | 1528.7198 | 1  | 3.589 | 68.2% |
|    | <a href="#">SmEgg304.02194.02194.2</a> | 3.2648 | 0.2604 | 99.8%  | 1569.31 | 1569.8157 | 1  | 5.198 | 72.7% |
|    | <a href="#">SmEgg205.03313.03313.2</a> | 3.397  | 0.3867 | 99.9%  | 1984.6  | 1985.2899 | 1  | 7.278 | 50.0% |
|    | <a href="#">SmEgg205.03335.03335.2</a> | 3.0124 | 0.1716 | 98.2%  | 1670.71 | 1671.8928 | 13 | 4.751 | 53.8% |
|    | <a href="#">SmEgg103.01578.01578.2</a> | 2.6756 | 0.1482 | 98.0%  | 1022.24 | 1022.1644 | 8  | 4.305 | 87.5% |
| *2 | <a href="#">SmEgg205.02626.02626.2</a> | 2.767  | 0.2157 | 99.8%  | 990.36  | 990.2493  | 12 | 4.537 | 85.7% |
|    | <a href="#">SmEgg304.01792.01792.1</a> | 2.4472 | 0.2677 | 100.0% | 1081.54 | 1081.1729 | 1  | 5.337 | 68.8% |
|    | <a href="#">SmEgg305.01961.01961.1</a> | 2.4709 | 0.213  | 99.2%  | 1217.54 | 1218.314  | 1  | 4.587 | 72.2% |
|    | <a href="#">SmEgg305.01888.01888.1</a> | 2.3422 | 0.2773 | 100.0% | 1264.58 | 1265.3746 | 1  | 5.778 | 55.6% |
|    | <a href="#">SmEgg102.02173.02173.1</a> | 2.0306 | 0.2185 | 96.7%  | 1357.56 | 1358.5153 | 1  | 4.838 | 70.0% |
|    | <a href="#">SmEgg202.02213.02213.2</a> | 3.2333 | 0.2983 | 99.8%  | 1358.48 | 1358.5153 | 15 | 5.285 | 70.0% |
|    | <a href="#">SmEgg303.02285.02285.2</a> | 3.0366 | 0.1897 | 98.8%  | 1611.29 | 1611.7583 | 1  | 5.596 | 61.5% |
|    | <a href="#">SmEgg106.02146.02146.1</a> | 2.1823 | 0.2362 | 99.3%  | 1298.78 | 1299.4757 | 60 | 4.398 | 50.0% |
|    | <a href="#">SmEgg104.01814.01814.2</a> | 3.7781 | 0.1446 | 99.8%  | 1143.44 | 1143.2882 | 2  | 4.067 | 93.8% |
|    | <a href="#">SmEgg205.03381.03381.2</a> | 4.4305 | 0.2778 | 100.0% | 1714.94 | 1714.9281 | 1  | 6.453 | 82.1% |

Similarities: [AI76491831-82](#)(9:18)

|                   |                                        |        |        |                       |         |           |     |        |       | GB 1VYF_A 55670477 1VYF_A Chain A, Fatty Acid Binding Protein In Complex With Oleic Acid. {Schistosoma mansoni} (exp=-1; wgp=0; cg=0), complete |
|-------------------|----------------------------------------|--------|--------|-----------------------|---------|-----------|-----|--------|-------|-------------------------------------------------------------------------------------------------------------------------------------------------|
| <a href="#">U</a> | <b>TC21279 1 38-173</b>                | 8      | 14     | <a href="#">50.7%</a> | 136     | 15190     | 8.6 |        |       |                                                                                                                                                 |
|                   | Filename                               | XCorr  | DeltCN | Conf%                 | ObsM+H+ | CalcM+H+  | SpR | ZScore | Ion%  |                                                                                                                                                 |
|                   | <a href="#">SmEgg304.01788.01788.2</a> | 2.5928 | 0.1875 | 97.4%                 | 1247.37 | 1247.3501 | 22  | 4.737  | 65.0% |                                                                                                                                                 |
|                   | <a href="#">SmEgg304.01783.01783.1</a> | 2.3537 | 0.2246 | 99.2%                 | 1247.53 | 1247.3501 | 7   | 4.267  | 50.0% |                                                                                                                                                 |
|                   | <a href="#">SmEgg203.02124.02124.1</a> | 2.8724 | 0.3203 | 100.0%                | 1464.54 | 1465.6208 | 1   | 5.832  | 58.3% |                                                                                                                                                 |
|                   | <a href="#">SmEgg204.02265.02265.2</a> | 2.7803 | 0.2146 | 99.7%                 | 889.46  | 890.0299  | 1   | 3.863  | 85.7% |                                                                                                                                                 |
|                   | <a href="#">SmEgg202.02660.02660.2</a> | 3.6224 | 0.4264 | 100.0%                | 1925.73 | 1926.1487 | 1   | 6.555  | 58.8% |                                                                                                                                                 |
| *                 | <a href="#">SmEgg102.01319.01319.2</a> | 2.9384 | 0.1792 | 99.7%                 | 1030.22 | 1030.1661 | 169 | 3.962  | 75.0% |                                                                                                                                                 |
| *                 | <a href="#">SmEgg102.00887.00887.1</a> | 1.9531 | 0.2357 | 98.7%                 | 894.4   | 894.9721  | 5   | 5.222  | 71.4% |                                                                                                                                                 |
| *                 | <a href="#">SmEgg102.02235.02235.2</a> | 3.7472 | 0.3963 | 100.0%                | 1233.29 | 1233.4075 | 1   | 6.609  | 86.4% |                                                                                                                                                 |

|                   |                                        |        |        |                       |         |           |     |        |       | similar to UP Q5C3E1_SCHJA (Q5C3E1) SJCHGC05968 protein (Fragment), partial (94%) |
|-------------------|----------------------------------------|--------|--------|-----------------------|---------|-----------|-----|--------|-------|-----------------------------------------------------------------------------------|
| <a href="#">U</a> | <b>TC25407 3 4-315</b>                 | 14     | 52     | <a href="#">50.3%</a> | 312     | 35482     | 6.2 |        |       |                                                                                   |
|                   | Filename                               | XCorr  | DeltCN | Conf%                 | ObsM+H+ | CalcM+H+  | SpR | ZScore | Ion%  |                                                                                   |
| *                 | <a href="#">SmEgg106.03197.03197.2</a> | 3.5642 | 0.2218 | 99.8%                 | 1602.5  | 1602.889  | 2   | 5.054  | 65.4% |                                                                                   |
| *                 | <a href="#">SmEgg403.02927.02927.1</a> | 2.5334 | 0.2964 | 100.0%                | 1071.46 | 1072.2493 | 3   | 5.078  | 68.8% |                                                                                   |
| *                 | <a href="#">SmEgg105.00639.00639.3</a> | 4.9106 | 0.4465 | 100.0%                | 2994.21 | 2995.3997 | 1   | 7.587  | 29.8% |                                                                                   |
| *                 | <a href="#">SmEgg203.03319.03319.2</a> | 3.7907 | 0.251  | 99.8%                 | 2091.8  | 2091.3691 | 1   | 5.715  | 50.0% |                                                                                   |
| *                 | <a href="#">SmEgg303.02276.02276.1</a> | 2.0693 | 0.2566 | 99.2%                 | 991.61  | 992.11975 | 10  | 4.372  | 62.5% |                                                                                   |
| *                 | <a href="#">SmEgg304.04068.04068.2</a> | 2.9638 | 0.238  | 99.3%                 | 3198.1  | 3199.3796 | 1   | 5.824  | 31.5% |                                                                                   |
| *                 | <a href="#">SmEgg303.02135.02135.1</a> | 2.1549 | 0.2255 | 99.3%                 | 1083.54 | 1084.2572 | 6   | 4.641  | 62.5% |                                                                                   |
| *                 | <a href="#">SmEgg304.03494.03494.2</a> | 2.6457 | 0.1925 | 95.7%                 | 1853.09 | 1854.0293 | 1   | 4.911  | 50.0% |                                                                                   |
| *                 | <a href="#">SmEgg203.00050.00050.2</a> | 5.0416 | 0.4133 | 100.0%                | 2275.68 | 2276.4668 | 1   | 7.22   | 45.0% |                                                                                   |
| *                 | <a href="#">SmEgg105.02181.02181.1</a> | 2.5547 | 0.2209 | 100.0%                | 1015.54 | 1016.1851 | 1   | 5.058  | 68.8% |                                                                                   |
| *                 | <a href="#">SmEgg205.02199.02199.1</a> | 2.207  | 0.3048 | 100.0%                | 1012.28 | 1013.107  | 13  | 4.932  | 64.3% |                                                                                   |

|   |                                        |        |        |        |         |           |   |       |       |
|---|----------------------------------------|--------|--------|--------|---------|-----------|---|-------|-------|
| * | <a href="#">SmEgg303.03551.03551.2</a> | 2.8948 | 0.2767 | 99.7%  | 1630.34 | 1630.7972 | 2 | 5.485 | 57.7% |
|   | <a href="#">SmEgg102.02458.02458.2</a> | 4.9196 | 0.4002 | 100.0% | 2406.6  | 2405.578  | 1 | 7.39  | 52.4% |
|   | <a href="#">SmEgg102.02467.02467.2</a> | 4.4206 | 0.3397 | 100.0% | 2532.92 | 2533.7087 | 1 | 7.488 | 43.2% |

|   |                         |   |    |                       |    |       |     |                                                                                                                                                                                   |  |  |
|---|-------------------------|---|----|-----------------------|----|-------|-----|-----------------------------------------------------------------------------------------------------------------------------------------------------------------------------------|--|--|
| U | <b>TC20533 3 20-107</b> | 6 | 17 | <a href="#">50.0%</a> | 88 | 10200 | 6.8 | homologue to GB 1RE6_A 47168752 1RE6_A Chain A, Localisation Of Dynein Light Chains 1 And 2 And Their Pro- Apoptotic Ligands. {Mus musculus} (exp=-1; wgp=0; cg=0), partial (95%) |  |  |
|---|-------------------------|---|----|-----------------------|----|-------|-----|-----------------------------------------------------------------------------------------------------------------------------------------------------------------------------------|--|--|

|  | Filename                               | XCorr  | DeltCN | Conf%  | ObsM+H+ | CalcM+H+  | SpR | ZScore | Ion%  | # |
|--|----------------------------------------|--------|--------|--------|---------|-----------|-----|--------|-------|---|
|  | <a href="#">SmEgg202.03060.03060.2</a> | 5.4689 | 0.4733 | 100.0% | 2470.8  | 2471.593  | 1   | 9.534  | 57.1% | 9 |
|  | <a href="#">SmEgg202.03037.03037.3</a> | 3.6292 | 0.2326 | 97.6%  | 2471.59 | 2471.593  | 1   | 5.4    | 32.1% | 1 |
|  | <a href="#">SmEgg202.03083.03083.2</a> | 3.8222 | 0.3769 | 100.0% | 2356.69 | 2357.4893 | 1   | 7.328  | 45.0% | 1 |
|  | <a href="#">SmEgg206.02322.02322.2</a> | 2.9922 | 0.2956 | 99.8%  | 1403.36 | 1403.5493 | 1   | 4.977  | 70.0% | 1 |
|  | <a href="#">SmEgg104.01906.01906.1</a> | 2.314  | 0.1918 | 96.8%  | 1282.55 | 1283.383  | 1   | 4.43   | 55.0% | 3 |
|  | <a href="#">SmEgg104.01907.01907.2</a> | 3.026  | 0.2775 | 99.8%  | 1283.41 | 1283.383  | 1   | 5.564  | 70.0% | 2 |

Similarities: [TC23427|2|20-100](#)(3:3)[TC29554|3|17-105](#)(2:4)

|   |                         |   |    |                       |     |       |     |                                                                                     |  |  |
|---|-------------------------|---|----|-----------------------|-----|-------|-----|-------------------------------------------------------------------------------------|--|--|
| U | <b>TC29617 1 11-152</b> | 7 | 26 | <a href="#">49.3%</a> | 142 | 16468 | 6.2 | UP SM16_SCHMA (Q07167) 16 kDa calcium-binding protein (Egg antigen SME16), complete |  |  |
|---|-------------------------|---|----|-----------------------|-----|-------|-----|-------------------------------------------------------------------------------------|--|--|

|   | Filename                               | XCorr  | DeltCN | Conf%  | ObsM+H+ | CalcM+H+  | SpR | ZScore | Ion%  |
|---|----------------------------------------|--------|--------|--------|---------|-----------|-----|--------|-------|
| * | <a href="#">SmEgg204.02612.02612.2</a> | 3.5483 | 0.0659 | 97.7%  | 1679.76 | 1679.8798 | 1   | 4.94   | 65.4% |
|   | <a href="#">SmEgg203.03854.03854.2</a> | 4.0401 | 0.2279 | 99.9%  | 1321.44 | 1321.5162 | 1   | 5.697  | 85.0% |
|   | <a href="#">SmEgg104.03369.03369.2</a> | 2.8078 | 0.1699 | 97.7%  | 1449.33 | 1449.6903 | 6   | 4.423  | 59.1% |
|   | <a href="#">SmEgg204.02300.02300.2</a> | 3.3923 | 0.095  | 99.6%  | 1308.52 | 1308.4795 | 11  | 3.875  | 77.8% |
|   | <a href="#">SmEgg202.02045.02045.2</a> | 4.3725 | 0.2902 | 100.0% | 1337.47 | 1337.4473 | 1   | 6.411  | 77.3% |
| * | <a href="#">SmEgg304.02922.02922.2</a> | 2.9643 | 0.2322 | 99.1%  | 2410.5  | 2410.5708 | 7   | 4.885  | 36.8% |
| * | <a href="#">SmEgg203.03948.03948.2</a> | 5.0827 | 0.4899 | 100.0% | 1705.82 | 1705.8181 | 1   | 8.525  | 80.8% |

|   |                         |    |    |                       |     |       |     |                                                                                                              |  |  |
|---|-------------------------|----|----|-----------------------|-----|-------|-----|--------------------------------------------------------------------------------------------------------------|--|--|
| U | <b>TC23458 2 18-446</b> | 14 | 62 | <a href="#">48.5%</a> | 429 | 46438 | 6.7 | UP ENO_SCHMA (Q27877) Enolase (2-phosphoglycerate dehydratase) (2-phospho-D-glycerate hydro-lyase), complete |  |  |
|---|-------------------------|----|----|-----------------------|-----|-------|-----|--------------------------------------------------------------------------------------------------------------|--|--|

|   | Filename                               | XCorr  | DeltCN | Conf%  | ObsM+H+ | CalcM+H+  | SpR | ZScore | Ion%  |
|---|----------------------------------------|--------|--------|--------|---------|-----------|-----|--------|-------|
|   | <a href="#">SmEgg104.02330.02330.2</a> | 4.6107 | 0.3122 | 100.0% | 1765.73 | 1765.964  | 1   | 6.812  | 64.7% |
|   | <a href="#">SmEgg306.02275.02275.2</a> | 3.296  | 0.0726 | 96.4%  | 1495.49 | 1495.8057 | 2   | 3.753  | 61.5% |
|   | <a href="#">SmEgg103.01919.01919.2</a> | 2.6472 | 0.2758 | 99.5%  | 1284.21 | 1284.4551 | 17  | 4.988  | 68.2% |
| * | <a href="#">SmEgg103.02243.02243.2</a> | 3.8456 | 0.1598 | 99.8%  | 1190.28 | 1189.3567 | 1   | 4.358  | 77.3% |
| * | <a href="#">SmEgg303.03115.03115.2</a> | 2.9364 | 0.1479 | 96.4%  | 2162.85 | 2162.4277 | 1   | 3.855  | 45.0% |
| * | <a href="#">SmEgg102.02805.02805.2</a> | 4.7237 | 0.4498 | 100.0% | 2614.9  | 2615.7537 | 1   | 7.149  | 47.8% |
| * | <a href="#">SmEgg302.02724.02724.2</a> | 3.6577 | 0.2484 | 99.8%  | 1977.68 | 1977.1559 | 1   | 5.997  | 47.2% |
|   | <a href="#">SmEgg203.03111.03111.2</a> | 3.3191 | 0.197  | 99.8%  | 1114.51 | 1114.3275 | 1   | 4.361  | 83.3% |
| * | <a href="#">SmEgg204.03049.03049.2</a> | 3.4348 | 0.3718 | 99.9%  | 2251.58 | 2251.4934 | 1   | 6.742  | 47.4% |
| * | <a href="#">SmEgg203.04466.04466.2</a> | 4.5795 | 0.3312 | 100.0% | 2465.99 | 2465.6777 | 1   | 6.638  | 55.3% |
| * | <a href="#">SmEgg202.03952.03952.2</a> | 3.1131 | 0.1722 | 98.5%  | 2220.68 | 2221.3845 | 1   | 4.693  | 50.0% |
| * | <a href="#">SmEgg202.02740.02740.2</a> | 3.5713 | 0.2836 | 99.8%  | 2116.88 | 2117.361  | 1   | 5.705  | 44.7% |
| * | <a href="#">SmEgg202.02537.02537.2</a> | 5.2166 | 0.372  | 100.0% | 1649.41 | 1649.8047 | 1   | 9.19   | 85.7% |
|   | <a href="#">SmEgg206.03371.03371.2</a> | 5.3217 | 0.459  | 100.0% | 2353.72 | 2354.5825 | 1   | 8.61   | 52.4% |

|   |                         |    |    |                       |     |       |     |                     |  |  |
|---|-------------------------|----|----|-----------------------|-----|-------|-----|---------------------|--|--|
| U | <b>TC22118 2 10-498</b> | 22 | 42 | <a href="#">48.1%</a> | 489 | 53487 | 6.3 | 30 kDa glycoprotein |  |  |
|---|-------------------------|----|----|-----------------------|-----|-------|-----|---------------------|--|--|

|   | Filename                               | XCorr  | DeltCN | Conf%  | ObsM+H+ | CalcM+H+  | SpR | ZScore | Ion%  |
|---|----------------------------------------|--------|--------|--------|---------|-----------|-----|--------|-------|
| * | <a href="#">SmEgg303.02664.02664.2</a> | 3.346  | 0.2414 | 99.7%  | 3036.52 | 3037.3162 | 16  | 4.937  | 28.0% |
| * | <a href="#">SmEgg204.02855.02855.3</a> | 4.5082 | 0.3856 | 100.0% | 3129.46 | 3129.3735 | 1   | 6.119  | 29.8% |
| * | <a href="#">SmEgg103.03118.03118.2</a> | 2.916  | 0.2845 | 99.7%  | 2999.61 | 3001.1995 | 1   | 5.435  | 30.0% |
| * | <a href="#">SmEgg102.02423.02423.2</a> | 3.8602 | 0.2169 | 99.8%  | 2553.49 | 2554.696  | 1   | 6.043  | 50.0% |



|    |                                        |        |        |        |         |           |   |       |       |
|----|----------------------------------------|--------|--------|--------|---------|-----------|---|-------|-------|
| *  | <a href="#">SmEgg203.03790.03790.2</a> | 5.4844 | 0.4866 | 100.0% | 1813.6  | 1814.0049 | 1 | 9.86  | 68.8% |
|    | <a href="#">SmEgg102.01743.01743.1</a> | 2.4636 | 0.2452 | 100.0% | 950.41  | 951.0233  | 1 | 5.229 | 78.6% |
| *  | <a href="#">SmEgg304.02779.02779.2</a> | 3.0413 | 0.2709 | 99.8%  | 1727.54 | 1728.005  | 5 | 4.571 | 46.7% |
| *2 | <a href="#">SmEgg304.02736.02736.2</a> | 3.4517 | 0.0654 | 96.7%  | 1567.98 | 1567.8662 | 3 | 4.363 | 53.6% |
| *  | <a href="#">SmEgg102.03848.03848.2</a> | 2.7988 | 0.2579 | 99.1%  | 2273.14 | 2273.4268 | 1 | 5.475 | 38.1% |
| *  | <a href="#">SmEgg203.03318.03318.2</a> | 4.3757 | 0.446  | 100.0% | 1682.06 | 1682.9727 | 1 | 8.344 | 76.7% |
| *  | <a href="#">SmEgg304.03399.03399.2</a> | 2.8499 | 0.2178 | 99.2%  | 1253.65 | 1253.5681 | 1 | 4.082 | 77.3% |
| *  | <a href="#">SmEgg102.03132.03132.1</a> | 2.8009 | 0.3494 | 100.0% | 1397.46 | 1398.6396 | 1 | 6.716 | 70.8% |
| *  | <a href="#">SmEgg202.03232.03232.2</a> | 4.3769 | 0.214  | 99.9%  | 1398.55 | 1398.6396 | 1 | 4.718 | 83.3% |
| *  | <a href="#">SmEgg105.02119.02119.2</a> | 4.5975 | 0.3543 | 100.0% | 2386.75 | 2386.5337 | 1 | 6.678 | 45.2% |
| *  | <a href="#">SmEgg203.03028.03028.2</a> | 4.759  | 0.3484 | 100.0% | 1681.39 | 1681.9874 | 1 | 7.052 | 84.6% |
| *  | <a href="#">SmEgg203.02999.02999.2</a> | 4.4041 | 0.3547 | 100.0% | 2547.92 | 2548.812  | 1 | 7.365 | 50.0% |
| *  | <a href="#">SmEgg202.03184.03184.2</a> | 4.6434 | 0.4259 | 100.0% | 2420.04 | 2420.638  | 1 | 7.71  | 54.8% |
| *  | <a href="#">SmEgg303.03027.03027.2</a> | 3.0681 | 0.3105 | 99.8%  | 1848.25 | 1848.1241 | 2 | 6.18  | 53.3% |
| *  | <a href="#">SmEgg303.03256.03256.2</a> | 3.6177 | 0.2743 | 99.9%  | 1432.54 | 1433.6538 | 1 | 5.416 | 77.3% |
| *  | <a href="#">SmEgg303.03265.03265.1</a> | 2.3195 | 0.1799 | 96.1%  | 1432.57 | 1433.6538 | 1 | 4.914 | 63.6% |
|    | <a href="#">SmEgg102.02675.02675.2</a> | 3.4504 | 0.2517 | 99.9%  | 1250.25 | 1250.394  | 1 | 5.4   | 88.9% |
|    | <a href="#">SmEgg204.02615.02615.2</a> | 5.0606 | 0.3773 | 100.0% | 1957.46 | 1956.137  | 1 | 7.34  | 61.1% |

[U](#) **TC29243|3|1-160** 5 8 [48.1%](#) 160 17999 7.9 similar to UP|Q86H19\_SCHJA (Q86H19)  
Nucleoside diphosphate kinase (Fragment), partial (95%)

|   | Filename                               | XCorr  | DeltCN | Conf%  | ObsM+H+ | CalcM+H+  | SpR | ZScore | Ion%  | # |
|---|----------------------------------------|--------|--------|--------|---------|-----------|-----|--------|-------|---|
|   | <a href="#">SmEgg205.02603.02603.2</a> | 4.2818 | 0.3398 | 100.0% | 2032.25 | 2031.3522 | 1   | 6.496  | 59.4% | 1 |
| * | <a href="#">SmEgg104.02830.02830.2</a> | 2.5636 | 0.272  | 98.6%  | 1493.4  | 1493.7792 | 5   | 4.861  | 53.8% | 1 |
| * | <a href="#">SmEgg105.02173.02173.2</a> | 3.0649 | 0.1721 | 98.1%  | 1776.83 | 1777.0118 | 1   | 4.385  | 50.0% | 1 |
| * | <a href="#">SmEgg203.00915.00915.2</a> | 3.3228 | 0.3219 | 99.8%  | 1472.5  | 1473.499  | 1   | 5.538  | 61.5% | 1 |
| * | <a href="#">SmEgg104.03718.03718.2</a> | 3.7609 | 0.2858 | 99.9%  | 1955.55 | 1956.1713 | 1   | 5.575  | 64.3% | 1 |

[U](#) **TC33456|4|1-129** 4 6 [48.1%](#) 129 13821 4.9 homologue to UP|TBB2\_ECHMU (Q9NFZ6)  
Tubulin beta-2 chain (Beta-tubulin 2), partial (21%)

|   | Filename                               | XCorr  | DeltCN | Conf% | ObsM+H+ | CalcM+H+  | SpR | ZScore | Ion%  | # |
|---|----------------------------------------|--------|--------|-------|---------|-----------|-----|--------|-------|---|
|   | <a href="#">SmEgg303.03099.03099.2</a> | 4.0416 | 0.3222 | 99.9% | 1820.0  | 1820.0161 | 1   | 7.054  | 60.0% | 1 |
| 2 | <a href="#">SmEgg103.03369.03369.3</a> | 4.0596 | 0.2172 | 99.5% | 3312.73 | 3313.593  | 1   | 5.434  | 26.6% | 2 |
|   | <a href="#">SmEgg202.02993.02993.2</a> | 3.5133 | 0.2538 | 99.8% | 1617.45 | 1616.8701 | 1   | 4.619  | 71.4% | 2 |
|   | <a href="#">SmEgg303.03500.03500.2</a> | 3.6035 | 0.2891 | 99.8% | 1988.66 | 1989.2941 | 1   | 6.012  | 47.2% | 1 |

Similarities: [TC24300|3|5-138](#)(2:2)[CD166225|2|18-72](#)(1:3)[TC31619|2|3-448](#)(2:2)

[U](#) **TC29739|2|1-347** 16 28 [46.4%](#) 347 37761 8.2 UP|G3P\_SCHMA (P20287)  
Glyceraldehyde-3-phosphate dehydrogenase (GAPDH) (Major larval surface antigen) (P-37), complete

|   | Filename                               | XCorr  | DeltCN | Conf%  | ObsM+H+ | CalcM+H+  | SpR | ZScore | Ion%  | # |
|---|----------------------------------------|--------|--------|--------|---------|-----------|-----|--------|-------|---|
| * | <a href="#">SmEgg103.00006.00006.2</a> | 2.8646 | 0.2158 | 98.4%  | 2332.4  | 2333.6147 | 1   | 4.861  | 44.7% | 1 |
| * | <a href="#">SmEgg206.03718.03718.2</a> | 2.9913 | 0.2158 | 99.0%  | 2705.65 | 2706.1409 | 1   | 5.198  | 38.6% | 1 |
| * | <a href="#">SmEgg302.04612.04612.2</a> | 2.6108 | 0.23   | 97.1%  | 2219.37 | 2219.511  | 2   | 5.642  | 41.7% | 1 |
|   | <a href="#">SmEgg205.02599.02599.2</a> | 2.8985 | 0.195  | 97.9%  | 2050.65 | 2051.2756 | 1   | 4.472  | 53.1% | 1 |
|   | <a href="#">SmEgg102.03214.03214.2</a> | 2.9405 | 0.2779 | 99.7%  | 1931.09 | 1932.0912 | 1   | 6.11   | 47.1% | 1 |
|   | <a href="#">SmEgg203.03430.03430.2</a> | 4.1655 | 0.3691 | 100.0% | 2538.74 | 2538.875  | 2   | 6.614  | 39.1% | 1 |
|   | <a href="#">SmEgg103.02434.02434.2</a> | 4.0583 | 0.4008 | 100.0% | 2112.86 | 2112.3352 | 1   | 6.826  | 52.6% | 1 |
|   | <a href="#">SmEgg206.02836.02836.2</a> | 3.4006 | 0.1667 | 99.4%  | 2335.22 | 2335.69   | 1   | 4.652  | 40.0% | 1 |
|   | <a href="#">SmEgg304.03104.03104.2</a> | 4.0898 | 0.3807 | 100.0% | 1777.01 | 1776.9934 | 1   | 7.101  | 66.7% | 1 |
|   | <a href="#">SmEgg304.03086.03086.2</a> | 3.7086 | 0.4209 | 100.0% | 1705.44 | 1705.9147 | 1   | 7.673  | 71.4% | 1 |
|   | <a href="#">SmEgg206.02639.02639.2</a> | 3.6848 | 0.2104 | 99.8%  | 1861.79 | 1862.1022 | 1   | 5.191  | 63.3% | 1 |

|                                        |        |        |       |         |           |    |       |       |   |
|----------------------------------------|--------|--------|-------|---------|-----------|----|-------|-------|---|
| <a href="#">SmEgg205.02769.02769.2</a> | 3.4942 | 0.2597 | 99.8% | 1714.75 | 1714.9255 | 1  | 6.478 | 78.6% | 1 |
| <a href="#">SmEgg103.02667.02667.2</a> | 3.4385 | 0.3568 | 99.9% | 1558.59 | 1558.7382 | 1  | 6.607 | 65.4% | 1 |
| <a href="#">SmEgg202.04149.04149.2</a> | 3.7394 | 0.2718 | 99.8% | 2884.84 | 2884.0767 | 1  | 6.215 | 36.5% | 1 |
| <a href="#">SmEgg305.02560.02560.2</a> | 2.6067 | 0.1474 | 97.5% | 1084.28 | 1084.322  | 14 | 4.205 | 75.0% | 1 |
| <a href="#">SmEgg206.02263.02263.2</a> | 3.4373 | 0.2565 | 99.9% | 1193.25 | 1193.4497 | 3  | 5.039 | 83.3% | 1 |

**U TC28616|3|1-181** 7 13 **46.4%** 181 21516 8.5 similar to UP|Q5D947\_SCHJA (Q5D947) SJCHGC00820 protein, partial (36%)

| Filename                               | XCorr  | DeltCN | Conf%  | ObsM+H+ | CalcM+H+  | SpR | ZScore | Ion%  | # |
|----------------------------------------|--------|--------|--------|---------|-----------|-----|--------|-------|---|
| <a href="#">SmEgg202.03040.03040.2</a> | 4.5165 | 0.3663 | 100.0% | 1898.35 | 1899.12   | 1   | 6.955  | 75.0% | 2 |
| <a href="#">SmEgg202.01686.01686.1</a> | 2.5044 | 0.1597 | 96.6%  | 1153.44 | 1154.2188 | 5   | 3.9    | 68.8% | 1 |
| <a href="#">SmEgg102.02673.02673.2</a> | 4.3899 | 0.4004 | 100.0% | 1849.43 | 1849.9452 | 1   | 7.643  | 71.4% | 2 |
| <a href="#">SmEgg103.02514.02514.1</a> | 2.3476 | 0.2271 | 99.2%  | 1527.67 | 1528.6616 | 42  | 5.047  | 45.8% | 1 |
| <a href="#">SmEgg103.02502.02502.2</a> | 3.5353 | 0.3303 | 99.9%  | 1528.51 | 1528.6616 | 1   | 5.822  | 58.3% | 2 |
| <a href="#">SmEgg205.02669.02669.2</a> | 3.0973 | 0.3014 | 99.8%  | 1293.69 | 1293.4833 | 9   | 5.825  | 70.0% | 2 |
| <a href="#">SmEgg203.04455.04455.2</a> | 3.9858 | 0.3597 | 100.0% | 2333.58 | 2332.6982 | 1   | 6.245  | 52.8% | 3 |

Similarities: [TC28591|3|156-620\(6:1\)](#)  
[CD188921|6|11-131\(1:6\)](#)  
[TC35744|3|20-132\(1:6\)](#)

**U TC23425|3|14-341** 21 74 **44.8%** 328 37915 4.9 UP|Q86QQ6\_SCHMA (Q86QQ6) Peptidylglycine alpha hydroxylating mono-oxygenase, partial (95%)

| Filename                                 | XCorr  | DeltCN | Conf%  | ObsM+H+ | CalcM+H+  | SpR | ZScore | Ion%  | # |
|------------------------------------------|--------|--------|--------|---------|-----------|-----|--------|-------|---|
| <a href="#">SmEgg303.03067.03067.1</a>   | 2.3888 | 0.2047 | 98.7%  | 1419.51 | 1419.6226 | 20  | 5.065  | 45.5% | 1 |
| <a href="#">SmEgg303.03071.03071.2</a>   | 3.3092 | 0.3198 | 99.9%  | 1419.6  | 1419.6226 | 1   | 5.714  | 68.2% | 1 |
| <a href="#">SmEgg305.02815.02815.2</a>   | 3.2321 | 0.2727 | 99.8%  | 1556.51 | 1556.7637 | 1   | 6.102  | 62.5% | 1 |
| <a href="#">SmEgg305.02819.02819.1</a>   | 2.2146 | 0.2573 | 99.5%  | 1556.64 | 1556.7637 | 2   | 5.41   | 50.0% | 1 |
| <a href="#">SmEgg303.01983.01983.2</a>   | 2.8186 | 0.3084 | 99.8%  | 1705.54 | 1705.7969 | 1   | 5.647  | 57.7% | 1 |
| <a href="#">SmEgg303.01980.01980.2</a>   | 2.8729 | 0.2428 | 99.0%  | 1762.34 | 1762.8488 | 1   | 4.777  | 60.7% | 1 |
| <a href="#">SmEgg202.04495.04495.2</a>   | 3.7188 | 0.3794 | 100.0% | 2843.04 | 2843.1948 | 1   | 7.017  | 41.7% | 1 |
| <a href="#">SmEgg304.03256.03256.2</a>   | 3.6886 | 0.3804 | 100.0% | 1843.63 | 1844.0919 | 1   | 6.512  | 62.5% | 1 |
| <a href="#">SmEgg304.03416.03416.2</a>   | 4.0561 | 0.3153 | 99.9%  | 2263.72 | 2262.5415 | 1   | 6.009  | 57.5% | 1 |
| <a href="#">SmEgg306.02330.02330.2</a>   | 3.315  | 0.1414 | 99.5%  | 1401.29 | 1401.6482 | 1   | 4.824  | 72.7% | 1 |
| <a href="#">SmEgg102.02041.02041.2</a>   | 4.5349 | 0.4055 | 100.0% | 1667.51 | 1666.7795 | 1   | 6.97   | 70.0% | 1 |
| * <a href="#">SmEgg103.03629.03629.3</a> | 3.9685 | 0.2703 | 99.3%  | 2316.07 | 2315.6282 | 1   | 5.312  | 32.1% | 1 |
| * <a href="#">SmEgg205.03582.03582.2</a> | 4.951  | 0.4158 | 100.0% | 2316.64 | 2315.6282 | 1   | 7.401  | 50.0% | 1 |
| <a href="#">SmEgg306.02187.02187.2</a>   | 2.77   | 0.1621 | 95.4%  | 1729.98 | 1729.9738 | 15  | 4.303  | 46.7% | 1 |
| <a href="#">SmEgg304.02072.02072.2</a>   | 2.5696 | 0.1929 | 95.4%  | 1513.98 | 1514.7214 | 1   | 4.747  | 57.7% | 1 |
| <a href="#">SmEgg304.02659.02659.2</a>   | 2.3139 | 0.2024 | 95.7%  | 1289.41 | 1289.4331 | 21  | 4.618  | 66.7% | 1 |
| <a href="#">SmEgg303.02481.02481.2</a>   | 2.6204 | 0.1299 | 96.9%  | 1175.49 | 1176.2737 | 20  | 4.597  | 81.2% | 1 |
| <a href="#">SmEgg203.00447.00447.2</a>   | 3.8841 | 0.3116 | 99.9%  | 2691.63 | 2691.7798 | 1   | 5.832  | 50.0% | 1 |
| <a href="#">SmEgg302.04446.04446.2</a>   | 4.0627 | 0.3384 | 100.0% | 1665.32 | 1665.7557 | 1   | 7.667  | 73.1% | 1 |
| <a href="#">SmEgg303.00143.00143.2</a>   | 5.1704 | 0.3277 | 100.0% | 2430.42 | 2429.5146 | 1   | 6.99   | 57.9% | 1 |
| <a href="#">SmEgg402.04811.04811.2</a>   | 2.7821 | 0.2576 | 99.0%  | 1876.1  | 1876.9275 | 1   | 5.974  | 57.1% | 1 |

**U TC21397|3|1-188** 9 14 **44.1%** 188 22180 6.4 UP|FRIH1\_SCHMA (P25319) Ferritin-1 heavy chain , complete

| Filename                                 | XCorr  | DeltCN | Conf%  | ObsM+H+ | CalcM+H+  | SpR | ZScore | Ion%  | # |
|------------------------------------------|--------|--------|--------|---------|-----------|-----|--------|-------|---|
| * <a href="#">SmEgg204.02184.02184.2</a> | 3.1898 | 0.2114 | 99.5%  | 1878.69 | 1878.0514 | 1   | 4.961  | 60.7% | 1 |
| * <a href="#">SmEgg304.02032.02032.2</a> | 3.2833 | 0.2176 | 99.7%  | 1843.21 | 1844.0342 | 1   | 5.248  | 67.9% | 1 |
| * <a href="#">SmEgg105.03897.03897.2</a> | 2.5459 | 0.2956 | 98.6%  | 3190.12 | 3191.6262 | 1   | 5.176  | 25.0% | 1 |
| * <a href="#">SmEgg205.03986.03986.2</a> | 3.1297 | 0.3091 | 99.8%  | 2739.12 | 2738.0442 | 2   | 5.468  | 31.2% | 1 |
| * <a href="#">SmEgg204.04312.04312.2</a> | 3.1177 | 0.377  | 99.8%  | 2508.61 | 2509.7961 | 1   | 6.089  | 38.6% | 1 |
| * <a href="#">SmEgg105.03885.03885.2</a> | 4.223  | 0.3644 | 100.0% | 2350.75 | 2351.6392 | 1   | 7.898  | 50.0% | 1 |
| * <a href="#">SmEgg205.03039.03039.2</a> | 4.7714 | 0.3062 | 100.0% | 1674.38 | 1673.9684 | 1   | 7.42   | 71.4% | 1 |

|   |                                        |        |        |       |         |           |    |       |       |
|---|----------------------------------------|--------|--------|-------|---------|-----------|----|-------|-------|
| * | <a href="#">SmEgg206.02884.02884.2</a> | 3.7344 | 0.2042 | 99.8% | 1336.51 | 1336.5742 | 1  | 4.976 | 85.0% |
| * | <a href="#">SmEgg202.02308.02308.1</a> | 2.471  | 0.1954 | 98.8% | 1299.56 | 1300.4105 | 59 | 4.531 | 50.0% |

|   |                                        |        |        |        |         |           |     |        |       | UP HSP70_SCHMA (P08418) Heat shock<br>70 kDa homolog protein (HSP70) (Major<br>surface antigen), complete |  |  |  |
|---|----------------------------------------|--------|--------|--------|---------|-----------|-----|--------|-------|-----------------------------------------------------------------------------------------------------------|--|--|--|
| U | TC33074 3 277-926                      | 30     | 83     | 43.8%  | 650     | 71304     | 5.6 |        |       |                                                                                                           |  |  |  |
|   | Filename                               | XCorr  | DeltCN | Conf%  | ObsM+H+ | CalcM+H+  | SpR | ZScore | Ion%  |                                                                                                           |  |  |  |
|   | <a href="#">SmEgg202.02317.02317.2</a> | 4.1045 | 0.3864 | 100.0% | 1651.42 | 1650.8468 | 1   | 7.002  | 75.0% |                                                                                                           |  |  |  |
|   | <a href="#">SmEgg205.02883.02883.1</a> | 2.4877 | 0.2927 | 100.0% | 1384.54 | 1385.5651 | 1   | 6.758  | 59.1% |                                                                                                           |  |  |  |
|   | <a href="#">SmEgg204.03664.03664.2</a> | 3.1225 | 0.0827 | 95.4%  | 1572.28 | 1573.8599 | 2   | 3.652  | 65.4% |                                                                                                           |  |  |  |
|   | <a href="#">SmEgg102.02909.02909.2</a> | 3.0044 | 0.199  | 98.6%  | 1983.59 | 1984.173  | 18  | 4.326  | 47.1% |                                                                                                           |  |  |  |
|   | <a href="#">SmEgg102.02714.02714.1</a> | 2.4522 | 0.2833 | 100.0% | 1169.61 | 1170.3542 | 13  | 5.009  | 59.1% |                                                                                                           |  |  |  |
|   | <a href="#">SmEgg102.02723.02723.2</a> | 3.8889 | 0.2649 | 99.9%  | 1170.21 | 1170.3542 | 1   | 5.188  | 86.4% |                                                                                                           |  |  |  |
|   | <a href="#">SmEgg304.02299.02299.2</a> | 3.2879 | 0.2108 | 99.7%  | 1311.49 | 1311.524  | 1   | 4.737  | 72.7% |                                                                                                           |  |  |  |
|   | <a href="#">SmEgg202.02872.02872.2</a> | 5.1894 | 0.324  | 100.0% | 1660.73 | 1660.9078 | 1   | 7.783  | 83.3% |                                                                                                           |  |  |  |
| 2 | <a href="#">SmEgg102.02809.02809.1</a> | 3.3635 | 0.4454 | 100.0% | 1190.35 | 1191.3696 | 1   | 7.67   | 68.2% |                                                                                                           |  |  |  |
|   | <a href="#">SmEgg203.02894.02894.1</a> | 2.3776 | 0.2911 | 100.0% | 1480.61 | 1481.6511 | 2   | 5.48   | 63.6% |                                                                                                           |  |  |  |
|   | <a href="#">SmEgg103.02793.02793.2</a> | 3.7587 | 0.2309 | 99.8%  | 1481.7  | 1481.6511 | 1   | 5.776  | 77.3% |                                                                                                           |  |  |  |
|   | <a href="#">SmEgg306.02302.02302.2</a> | 3.1082 | 0.3506 | 99.8%  | 1816.46 | 1817.1107 | 1   | 6.628  | 46.7% |                                                                                                           |  |  |  |
|   | <a href="#">SmEgg104.02171.02171.1</a> | 3.1973 | 0.2656 | 100.0% | 1481.66 | 1482.6798 | 2   | 6.776  | 53.8% |                                                                                                           |  |  |  |
|   | <a href="#">SmEgg205.02526.02526.2</a> | 4.4213 | 0.3443 | 100.0% | 1482.68 | 1482.6798 | 1   | 6.888  | 80.8% |                                                                                                           |  |  |  |
|   | <a href="#">SmEgg102.03960.03960.2</a> | 5.487  | 0.5259 | 100.0% | 2259.9  | 2261.4937 | 1   | 10.273 | 63.6% |                                                                                                           |  |  |  |
|   | <a href="#">SmEgg102.03938.03938.3</a> | 4.3805 | 0.2839 | 100.0% | 2260.81 | 2261.4937 | 1   | 6.151  | 30.7% |                                                                                                           |  |  |  |
|   | <a href="#">SmEgg304.04020.04020.2</a> | 4.1414 | 0.253  | 99.9%  | 2056.78 | 2057.315  | 1   | 5.186  | 52.8% |                                                                                                           |  |  |  |
|   | <a href="#">SmEgg305.01675.01675.2</a> | 2.5931 | 0.224  | 98.6%  | 1287.6  | 1288.4465 | 67  | 4.68   | 60.0% |                                                                                                           |  |  |  |
| * | <a href="#">SmEgg202.03808.03808.3</a> | 4.8508 | 0.325  | 100.0% | 2758.8  | 2759.989  | 1   | 6.611  | 35.9% |                                                                                                           |  |  |  |
| * | <a href="#">SmEgg204.03836.03836.2</a> | 4.4965 | 0.4259 | 100.0% | 2760.02 | 2759.989  | 1   | 7.987  | 54.3% |                                                                                                           |  |  |  |
| 2 | <a href="#">SmEgg305.02004.02004.2</a> | 2.5894 | 0.1834 | 95.2%  | 1705.69 | 1705.9268 | 1   | 4.42   | 57.7% |                                                                                                           |  |  |  |
| 2 | <a href="#">SmEgg105.01961.01961.2</a> | 3.4593 | 0.1435 | 99.8%  | 1217.36 | 1217.3677 | 18  | 4.305  | 72.2% |                                                                                                           |  |  |  |
|   | <a href="#">SmEgg202.02606.02606.2</a> | 3.2817 | 0.2052 | 99.8%  | 1335.18 | 1335.5145 | 21  | 4.215  | 70.0% |                                                                                                           |  |  |  |
|   | <a href="#">SmEgg303.02543.02543.2</a> | 3.6355 | 0.254  | 99.9%  | 1503.25 | 1503.6178 | 1   | 5.535  | 68.2% |                                                                                                           |  |  |  |
|   | <a href="#">SmEgg403.03023.03023.1</a> | 2.2274 | 0.2439 | 99.2%  | 1503.71 | 1503.6178 | 9   | 5.037  | 50.0% |                                                                                                           |  |  |  |
|   | <a href="#">SmEgg302.02803.02803.2</a> | 3.9042 | 0.2381 | 99.9%  | 1375.44 | 1375.4437 | 1   | 6.252  | 85.0% |                                                                                                           |  |  |  |
|   | <a href="#">SmEgg203.02648.02648.2</a> | 4.4717 | 0.4515 | 100.0% | 1918.97 | 1919.021  | 1   | 7.757  | 63.3% |                                                                                                           |  |  |  |
|   | <a href="#">SmEgg305.02168.02168.2</a> | 2.8654 | 0.1861 | 97.7%  | 1685.94 | 1686.9556 | 20  | 4.372  | 53.8% |                                                                                                           |  |  |  |
|   | <a href="#">SmEgg105.02125.02125.2</a> | 3.8499 | 0.4066 | 100.0% | 2064.53 | 2064.255  | 1   | 7.89   | 52.3% |                                                                                                           |  |  |  |
|   | <a href="#">SmEgg303.01732.01732.1</a> | 2.9395 | 0.3596 | 100.0% | 1430.68 | 1431.4991 | 1   | 7.379  | 50.0% |                                                                                                           |  |  |  |

Similarities: [TC25063|2|48-576\(2:28\)](#)

|   |                                        |        |        |        |         |           |     |        |       | similar to UP Q5BXC3_SCHJA (Q5BXC3)<br>SJCHGC06167 protein (Fragment), complete |  |  |  |
|---|----------------------------------------|--------|--------|--------|---------|-----------|-----|--------|-------|---------------------------------------------------------------------------------|--|--|--|
| U | TC21999 3 15-366                       | 7      | 15     | 43.8%  | 352     | 38400     | 4.6 |        |       |                                                                                 |  |  |  |
|   | Filename                               | XCorr  | DeltCN | Conf%  | ObsM+H+ | CalcM+H+  | SpR | ZScore | Ion%  |                                                                                 |  |  |  |
| * | <a href="#">SmEgg102.01597.01597.2</a> | 3.6033 | 0.3967 | 100.0% | 2049.39 | 2049.1558 | 1   | 6.857  | 42.1% |                                                                                 |  |  |  |
| * | <a href="#">SmEgg202.03257.03257.2</a> | 3.7051 | 0.2739 | 99.8%  | 2224.61 | 2225.4197 | 1   | 5.336  | 42.1% |                                                                                 |  |  |  |
| * | <a href="#">SmEgg202.04080.04080.3</a> | 4.9193 | 0.4319 | 100.0% | 4532.75 | 4533.789  | 1   | 7.755  | 21.4% |                                                                                 |  |  |  |
| * | <a href="#">SmEgg204.00023.00023.2</a> | 4.8615 | 0.3481 | 100.0% | 2891.12 | 2892.2847 | 1   | 7.462  | 44.0% |                                                                                 |  |  |  |
| * | <a href="#">SmEgg204.00030.00030.3</a> | 4.9022 | 0.338  | 100.0% | 2892.35 | 2892.2847 | 1   | 6.603  | 29.0% |                                                                                 |  |  |  |
| * | <a href="#">SmEgg205.03614.03614.3</a> | 3.8506 | 0.2352 | 98.5%  | 3048.16 | 3048.3823 | 1   | 5.394  | 26.0% |                                                                                 |  |  |  |
|   | <a href="#">SmEgg203.04222.04222.2</a> | 3.2828 | 0.2593 | 99.7%  | 2102.1  | 2102.3577 | 1   | 5.474  | 44.1% |                                                                                 |  |  |  |

|   |                                        |        |        |        |         |           |     |        |       | similar to UP Q5DF77_SCHJA (Q5DF77)<br>SJCHGC01853 protein, partial (93%) |  |  |  |
|---|----------------------------------------|--------|--------|--------|---------|-----------|-----|--------|-------|---------------------------------------------------------------------------|--|--|--|
| U | TC26653 1 1-206                        | 9      | 23     | 43.7%  | 206     | 24474     | 6.1 |        |       |                                                                           |  |  |  |
|   | Filename                               | XCorr  | DeltCN | Conf%  | ObsM+H+ | CalcM+H+  | SpR | ZScore | Ion%  |                                                                           |  |  |  |
|   | <a href="#">SmEgg103.01834.01834.1</a> | 2.5934 | 0.2851 | 100.0% | 1063.41 | 1064.1492 | 1   | 6.078  | 78.6% |                                                                           |  |  |  |
|   | <a href="#">SmEgg203.04327.04327.2</a> | 4.4195 | 0.3131 | 100.0% | 2227.77 | 2228.4258 | 1   | 6.666  | 55.9% |                                                                           |  |  |  |
|   | <a href="#">SmEgg203.04495.04495.3</a> | 4.7237 | 0.2531 | 100.0% | 3638.62 | 3639.8977 | 1   | 5.844  | 27.7% |                                                                           |  |  |  |

|   |                                        |        |        |        |         |           |    |       |       |  |
|---|----------------------------------------|--------|--------|--------|---------|-----------|----|-------|-------|--|
|   | <a href="#">SmEgg304.02708.02708.2</a> | 4.0698 | 0.3377 | 100.0% | 1994.37 | 1994.1395 | 1  | 6.895 | 63.3% |  |
|   | <a href="#">SmEgg203.02351.02351.1</a> | 2.6643 | 0.2682 | 100.0% | 1493.62 | 1493.6814 | 1  | 5.216 | 58.3% |  |
|   | <a href="#">SmEgg203.02415.02415.2</a> | 3.6482 | 0.271  | 99.9%  | 1493.67 | 1493.6814 | 1  | 5.836 | 75.0% |  |
| * | <a href="#">SmEgg305.02556.02556.2</a> | 2.5435 | 0.2042 | 95.2%  | 1864.37 | 1865.1772 | 1  | 4.883 | 50.0% |  |
| * | <a href="#">SmEgg103.02133.02133.2</a> | 3.5101 | 0.4089 | 100.0% | 1676.62 | 1676.8413 | 1  | 6.795 | 69.2% |  |
| * | <a href="#">SmEgg305.02271.02271.1</a> | 2.3482 | 0.2223 | 99.2%  | 1075.53 | 1076.2401 | 47 | 4.067 | 62.5% |  |

U **CD166225|2|18-72** 5 12 [43.6%](#) 55 5793 4.7 SP|P05217|TBB2\_HUMAN Tubulin beta-2 chain. [Mouse] {Mus musculus}, partial (27%)

|  | Filename                               | XCorr  | DeltCN | Conf%  | ObsM+H+ | CalcM+H+  | SpR | ZScore | Ion%  | # |
|--|----------------------------------------|--------|--------|--------|---------|-----------|-----|--------|-------|---|
|  | <a href="#">SmEgg203.03956.03956.2</a> | 6.353  | 0.4096 | 100.0% | 1960.68 | 1960.151  | 1   | 7.958  | 85.3% | 4 |
|  | <a href="#">SmEgg303.03683.03683.2</a> | 4.3645 | 0.4634 | 100.0% | 1893.8  | 1894.1321 | 1   | 8.32   | 62.5% | 2 |
|  | <a href="#">SmEgg303.03891.03891.2</a> | 3.3508 | 0.3205 | 99.8%  | 2023.41 | 2023.2476 | 1   | 5.686  | 47.1% | 3 |
|  | <a href="#">SmEgg305.03943.03943.2</a> | 3.432  | 0.2614 | 99.8%  | 2472.43 | 2470.6587 | 1   | 5.608  | 47.6% | 2 |
|  | <a href="#">SmEgg303.03099.03099.2</a> | 4.0416 | 0.3222 | 99.9%  | 1820.0  | 1820.0161 | 1   | 7.054  | 60.0% | 1 |

Similarities: [TC334564|1-129](#)(1:4)

U **TC28956|3|30-133** 10 25 [43.3%](#) 104 11466 11.4 UP|Q80WC8\_MOUSE (Q80WC8) Hist2h4 protein (Fragment), partial (92%)

U **TC33043|3|1-118** 10 25 [38.1%](#) 118 12979 10.6 UP|Q80WC8\_MOUSE (Q80WC8) Hist2h4 protein (Fragment), partial (93%)

|  | Filename                               | XCorr  | DeltCN | Conf%  | ObsM+H+ | CalcM+H+  | SpR | ZScore | Ion%  | # |
|--|----------------------------------------|--------|--------|--------|---------|-----------|-----|--------|-------|---|
|  | <a href="#">SmEgg104.02126.02126.2</a> | 3.5039 | 0.2492 | 99.8%  | 1337.31 | 1337.5187 | 1   | 4.922  | 75.0% | 5 |
|  | <a href="#">SmEgg202.02245.02245.2</a> | 3.6302 | 0.2067 | 99.8%  | 1181.36 | 1181.3312 | 1   | 4.917  | 88.9% | 1 |
|  | <a href="#">SmEgg203.02156.02156.2</a> | 2.5859 | 0.1604 | 95.3%  | 1337.3  | 1337.5156 | 12  | 3.725  | 63.6% | 1 |
|  | <a href="#">SmEgg404.02659.02659.2</a> | 3.258  | 0.1982 | 99.8%  | 1377.78 | 1378.6115 | 2   | 4.869  | 77.3% | 2 |
|  | <a href="#">SmEgg303.01765.01765.2</a> | 2.7755 | 0.0906 | 95.7%  | 1208.47 | 1208.4001 | 20  | 3.331  | 72.2% | 1 |
|  | <a href="#">SmEgg204.02783.02783.2</a> | 2.9127 | 0.0369 | 97.1%  | 990.34  | 990.19055 | 30  | 4.447  | 85.7% | 2 |
|  | <a href="#">SmEgg402.02723.02723.2</a> | 2.3539 | 0.2239 | 96.4%  | 1292.83 | 1293.4624 | 1   | 4.572  | 80.0% | 1 |
|  | <a href="#">SmEgg102.01591.01591.1</a> | 2.9218 | 0.2854 | 100.0% | 1134.47 | 1135.2188 | 2   | 5.941  | 66.7% | 4 |
|  | <a href="#">SmEgg202.01640.01640.2</a> | 2.9688 | 0.2246 | 99.7%  | 1135.09 | 1135.2188 | 2   | 5.129  | 77.8% | 3 |
|  | <a href="#">SmEgg102.03218.03218.2</a> | 3.6984 | 0.3114 | 99.9%  | 1312.43 | 1311.5793 | 1   | 6.231  | 77.3% | 5 |

U **TC21084|3|17-298** 8 13 [42.9%](#) 282 32164 6.1 similar to UP|Q5DE13\_SCHJA (Q5DE13) SJCHGC07024 protein, partial (98%)

|   | Filename                               | XCorr  | DeltCN | Conf%  | ObsM+H+ | CalcM+H+  | SpR | ZScore | Ion%  | # |
|---|----------------------------------------|--------|--------|--------|---------|-----------|-----|--------|-------|---|
| * | <a href="#">SmEgg403.03620.03620.2</a> | 2.6011 | 0.2372 | 97.3%  | 1957.16 | 1958.1523 | 2   | 5.79   | 50.0% |   |
| * | <a href="#">SmEgg102.03257.03257.2</a> | 3.1918 | 0.2903 | 99.8%  | 2847.84 | 2849.0447 | 1   | 5.553  | 34.8% |   |
|   | <a href="#">SmEgg203.04510.04510.2</a> | 4.9246 | 0.4694 | 100.0% | 1790.3  | 1791.0692 | 1   | 8.247  | 80.0% |   |
| * | <a href="#">SmEgg205.02737.02737.2</a> | 3.7747 | 0.3057 | 99.9%  | 1818.59 | 1819.0857 | 1   | 5.962  | 53.3% |   |
| * | <a href="#">SmEgg105.02603.02603.2</a> | 3.8612 | 0.3239 | 99.9%  | 1883.64 | 1884.0984 | 1   | 6.757  | 65.6% |   |
| * | <a href="#">SmEgg104.01763.01763.2</a> | 2.8057 | 0.1611 | 98.0%  | 1398.33 | 1398.5614 | 1   | 5.524  | 75.0% |   |
| * | <a href="#">SmEgg303.02724.02724.2</a> | 2.8499 | 0.1856 | 97.2%  | 2485.96 | 2487.6135 | 1   | 5.142  | 35.0% |   |
| * | <a href="#">SmEgg102.03028.03028.2</a> | 3.7272 | 0.1787 | 99.8%  | 2230.15 | 2230.3208 | 1   | 5.096  | 47.2% |   |

U **TC23687|3|33-357** 11 40 [42.8%](#) 325 34639 7.9 homologue to UP|Q5D9T1\_SCHJA (Q5D9T1) SJCHGC06124 protein, partial (92%)

|   | Filename                               | XCorr  | DeltCN | Conf%  | ObsM+H+ | CalcM+H+  | SpR | ZScore | Ion%  | # |
|---|----------------------------------------|--------|--------|--------|---------|-----------|-----|--------|-------|---|
|   | <a href="#">SmEgg105.03467.03467.2</a> | 3.9383 | 0.3534 | 100.0% | 1897.56 | 1897.2249 | 1   | 6.262  | 53.1% |   |
|   | <a href="#">SmEgg404.03210.03210.1</a> | 3.2518 | 0.4656 | 100.0% | 1495.68 | 1496.6263 | 1   | 8.222  | 53.6% |   |
|   | <a href="#">SmEgg304.02714.02714.2</a> | 2.941  | 0.3064 | 99.8%  | 1496.01 | 1496.6263 | 3   | 5.424  | 57.1% |   |
|   | <a href="#">SmEgg105.03607.03607.2</a> | 2.9772 | 0.2027 | 98.6%  | 2435.03 | 2436.8384 | 1   | 4.843  | 37.0% |   |
| * | <a href="#">SmEgg204.04440.04440.2</a> | 5.4541 | 0.4289 | 100.0% | 2196.35 | 2197.3699 | 1   | 8.896  | 57.9% |   |
| * | <a href="#">SmEgg206.03158.03158.2</a> | 4.9506 | 0.4142 | 100.0% | 2369.85 | 2369.8318 | 1   | 7.781  | 54.8% |   |
| * | <a href="#">SmEgg306.02698.02698.2</a> | 2.7162 | 0.2692 | 99.0%  | 1935.54 | 1936.225  | 5   | 5.093  | 47.2% |   |

|                                        |        |        |        |         |           |    |       |       |
|----------------------------------------|--------|--------|--------|---------|-----------|----|-------|-------|
| <a href="#">SmEgg103.01797.01797.2</a> | 3.5165 | 0.2074 | 99.8%  | 1430.59 | 1430.6011 | 1  | 4.742 | 79.2% |
| <a href="#">SmEgg302.01207.01207.1</a> | 2.1005 | 0.212  | 96.6%  | 1032.48 | 1033.1234 | 12 | 4.567 | 66.7% |
| <a href="#">SmEgg104.03409.03409.2</a> | 4.1882 | 0.3375 | 100.0% | 1281.63 | 1281.5127 | 1  | 6.422 | 77.3% |
| <a href="#">SmEgg102.02742.02742.2</a> | 3.8065 | 0.1484 | 99.8%  | 1264.09 | 1264.4613 | 7  | 4.021 | 83.3% |

Similarities: [TC27226|2|31-145\(4:7\)](#)

**U TC19838|2|16-276** 12 18 **42.1%** 261 29181 8.0 UP|TPIS\_SCHMA (P48501)  
Triosephosphate isomerase (TIM)  
(Triose-phosphate isomerase), complete

| Filename                                 | XCorr  | DeltCN | Conf%  | ObsM+H+ | CalcM+H+  | SpR | ZScore | Ion%  |
|------------------------------------------|--------|--------|--------|---------|-----------|-----|--------|-------|
| * <a href="#">SmEgg104.01748.01748.1</a> | 3.5416 | 0.3622 | 100.0% | 1332.63 | 1333.4528 | 1   | 7.132  | 65.0% |
| * <a href="#">SmEgg103.02889.02889.2</a> | 4.5038 | 0.3762 | 100.0% | 1657.08 | 1657.7894 | 1   | 6.541  | 69.2% |
| <a href="#">SmEgg102.02774.02774.2</a>   | 4.2837 | 0.302  | 100.0% | 1465.34 | 1465.6    | 1   | 6.488  | 83.3% |
| <a href="#">SmEgg102.02761.02761.1</a>   | 2.5472 | 0.1692 | 96.7%  | 1465.56 | 1465.6    | 95  | 3.898  | 45.8% |
| <a href="#">SmEgg106.02688.02688.2</a>   | 4.2513 | 0.4106 | 100.0% | 1745.68 | 1746.0623 | 1   | 7.325  | 66.7% |
| <a href="#">SmEgg203.03231.03231.1</a>   | 2.6084 | 0.1975 | 99.3%  | 1589.76 | 1589.8749 | 20  | 5.137  | 46.4% |
| * <a href="#">SmEgg205.02539.02539.2</a> | 2.9205 | 0.3861 | 99.8%  | 1739.59 | 1738.9437 | 1   | 6.755  | 64.3% |
| * <a href="#">SmEgg106.02306.02306.2</a> | 2.9034 | 0.2252 | 98.7%  | 1866.69 | 1867.1178 | 1   | 5.328  | 46.7% |
| * <a href="#">SmEgg103.01946.01946.1</a> | 1.9947 | 0.2633 | 99.3%  | 1353.6  | 1354.5121 | 10  | 4.761  | 50.0% |
| * <a href="#">SmEgg203.03276.03276.2</a> | 4.05   | 0.2478 | 99.9%  | 2990.43 | 2990.3057 | 1   | 5.945  | 38.5% |
| * <a href="#">SmEgg203.03278.03278.3</a> | 3.7396 | 0.2815 | 99.4%  | 2991.79 | 2990.3057 | 1   | 5.184  | 26.0% |
| * <a href="#">SmEgg303.02197.02197.2</a> | 2.5534 | 0.2298 | 98.8%  | 1224.29 | 1224.3624 | 1   | 4.679  | 77.8% |

**U TC19983|1|16-401** 14 27 **39.9%** 386 44618 4.8 UP|CRTC\_SCHMA (Q06814) Calreticulin  
precursor (SM4 protein), complete

| Filename                                 | XCorr  | DeltCN | Conf%  | ObsM+H+ | CalcM+H+  | SpR | ZScore | Ion%  |
|------------------------------------------|--------|--------|--------|---------|-----------|-----|--------|-------|
| * <a href="#">SmEgg104.04147.04147.2</a> | 3.963  | 0.3727 | 100.0% | 3174.05 | 3173.3784 | 1   | 6.587  | 42.0% |
| <a href="#">SmEgg303.02515.02515.2</a>   | 3.2691 | 0.2939 | 99.8%  | 1870.46 | 1870.11   | 1   | 5.383  | 52.9% |
| <a href="#">SmEgg202.02975.02975.2</a>   | 3.3819 | 0.2232 | 99.8%  | 1283.46 | 1283.4644 | 2   | 5.222  | 77.3% |
| <a href="#">SmEgg102.02882.02882.1</a>   | 2.7953 | 0.1456 | 96.8%  | 1283.56 | 1283.4644 | 4   | 4.284  | 54.5% |
| <a href="#">SmEgg103.02863.02863.2</a>   | 3.2418 | 0.2676 | 99.8%  | 1441.36 | 1441.7097 | 1   | 5.271  | 79.2% |
| <a href="#">SmEgg203.02982.02982.1</a>   | 2.6403 | 0.2766 | 100.0% | 1441.6  | 1441.7097 | 1   | 5.778  | 54.2% |
| <a href="#">SmEgg106.02350.02350.1</a>   | 2.5857 | 0.1977 | 99.5%  | 1019.59 | 1020.2193 | 14  | 4.332  | 71.4% |
| <a href="#">SmEgg206.02392.02392.1</a>   | 3.036  | 0.2091 | 100.0% | 1526.79 | 1527.7635 | 8   | 5.0    | 54.2% |
| <a href="#">SmEgg106.02444.02444.2</a>   | 4.7305 | 0.3734 | 100.0% | 1527.62 | 1527.7635 | 1   | 7.691  | 87.5% |
| * <a href="#">SmEgg204.02580.02580.2</a> | 3.0876 | 0.3308 | 99.8%  | 2044.34 | 2045.3434 | 1   | 6.585  | 50.0% |
| <a href="#">SmEgg202.02719.02719.2</a>   | 5.2609 | 0.3888 | 100.0% | 2078.47 | 2078.1528 | 1   | 8.023  | 81.2% |
| <a href="#">SmEgg203.02559.02559.2</a>   | 4.3881 | 0.3853 | 100.0% | 2219.92 | 2219.3467 | 1   | 6.776  | 64.7% |
| <a href="#">SmEgg205.02525.02525.2</a>   | 4.179  | 0.3175 | 100.0% | 1994.71 | 1995.242  | 1   | 6.601  | 63.3% |
| <a href="#">SmEgg102.00834.00834.2</a>   | 4.1049 | 0.393  | 100.0% | 1824.55 | 1824.8499 | 1   | 7.457  | 60.0% |

**U TC27245|1|1-124** 5 11 **39.5%** 124 14063 8.5 similar to UP|Q86F71\_SCHJA (Q86F71) Clone  
ZD1055 mRNA sequence, partial (98%)

| Filename                                 | XCorr  | DeltCN | Conf%  | ObsM+H+ | CalcM+H+  | SpR | ZScore | Ion%  |
|------------------------------------------|--------|--------|--------|---------|-----------|-----|--------|-------|
| * <a href="#">SmEgg105.02174.02174.2</a> | 4.092  | 0.3762 | 100.0% | 1393.59 | 1393.5858 | 1   | 7.593  | 80.8% |
| * <a href="#">SmEgg202.02193.02193.1</a> | 2.5491 | 0.3541 | 100.0% | 1371.61 | 1372.5273 | 3   | 6.126  | 58.3% |
| * <a href="#">SmEgg304.02372.02372.2</a> | 4.0028 | 0.4055 | 100.0% | 1883.49 | 1884.1052 | 1   | 7.079  | 53.1% |
| * <a href="#">SmEgg304.03496.03496.2</a> | 3.0511 | 0.1814 | 99.4%  | 1516.69 | 1516.7338 | 1   | 4.338  | 72.7% |
| * <a href="#">SmEgg202.03509.03509.2</a> | 3.9118 | 0.2995 | 100.0% | 1544.88 | 1544.7472 | 1   | 6.463  | 72.7% |

**U TC30162|3|15-252** 11 30 **39.1%** 238 26898 5.3 similar to UP|Q6IX09\_SCHBO (Q6IX09)  
14-3-3 zeta isoform (14-3-3 protein zeta),  
partial (95%)

| Filename                               | XCorr  | DeltCN | Conf%  | ObsM+H+ | CalcM+H+  | SpR | ZScore | Ion%  |
|----------------------------------------|--------|--------|--------|---------|-----------|-----|--------|-------|
| <a href="#">SmEgg202.02268.02268.1</a> | 2.8342 | 0.2125 | 100.0% | 1325.59 | 1326.4924 | 3   | 4.844  | 63.6% |
| <a href="#">SmEgg202.02272.02272.2</a> | 4.1811 | 0.321  | 100.0% | 1326.28 | 1326.4924 | 1   | 6.684  | 86.4% |

|   |                                        |        |        |        |         |           |    |       |       |
|---|----------------------------------------|--------|--------|--------|---------|-----------|----|-------|-------|
|   | <a href="#">SmEgg202.02188.02188.2</a> | 3.9855 | 0.2306 | 99.8%  | 1813.7  | 1814.0382 | 1  | 6.166 | 66.7% |
| * | <a href="#">SmEgg203.01822.01822.2</a> | 3.9461 | 0.3608 | 100.0% | 1583.22 | 1583.6549 | 1  | 6.611 | 69.2% |
| * | <a href="#">SmEgg203.01824.01824.1</a> | 2.0889 | 0.21   | 96.8%  | 1583.71 | 1583.6549 | 29 | 4.227 | 42.3% |
| * | <a href="#">SmEgg203.04044.04044.2</a> | 3.1391 | 0.1039 | 96.6%  | 1628.52 | 1628.9159 | 2  | 4.785 | 57.7% |
| * | <a href="#">SmEgg204.01188.01188.2</a> | 3.0197 | 0.148  | 99.8%  | 959.31  | 959.0934  | 4  | 3.736 | 85.7% |
|   | <a href="#">SmEgg202.03939.03939.2</a> | 6.203  | 0.4027 | 100.0% | 2116.74 | 2117.2305 | 1  | 8.488 | 66.7% |
|   | <a href="#">SmEgg304.03182.03182.2</a> | 3.061  | 0.2657 | 99.7%  | 2199.89 | 2199.4346 | 2  | 4.701 | 38.9% |
|   | <a href="#">SmEgg202.03948.03948.1</a> | 2.407  | 0.3126 | 100.0% | 1424.56 | 1425.4918 | 1  | 6.148 | 68.2% |
| 2 | <a href="#">SmEgg103.03729.03729.2</a> | 3.9306 | 0.0448 | 99.8%  | 1190.3  | 1190.4436 | 1  | 3.656 | 88.9% |

Similarities: [TC198273|12-261\(7:4\)](#)[TC22539|257-333\(1:10\)](#)[TC199703|1529-1794\(1:10\)](#)

| U | <b>TC28591 3 156-620</b>               | 16     | 38     | <b>38.5%</b> | 465     | 53847     | 5.5 | UP Q26582_SCHMA (Q26582) Heat shock protein 86 (Fragment), complete |       |  |
|---|----------------------------------------|--------|--------|--------------|---------|-----------|-----|---------------------------------------------------------------------|-------|--|
|   | Filename                               | XCorr  | DeltCN | Conf%        | ObsM+H+ | CalcM+H+  | SpR | ZScore                                                              | Ion%  |  |
|   | <a href="#">SmEgg202.01686.01686.1</a> | 2.5044 | 0.1597 | 96.6%        | 1153.44 | 1154.2188 | 5   | 3.9                                                                 | 68.8% |  |
|   | <a href="#">SmEgg102.02673.02673.2</a> | 4.3899 | 0.4004 | 100.0%       | 1849.43 | 1849.9452 | 1   | 7.643                                                               | 71.4% |  |
|   | <a href="#">SmEgg103.02514.02514.1</a> | 2.3476 | 0.2271 | 99.2%        | 1527.67 | 1528.6616 | 42  | 5.047                                                               | 45.8% |  |
|   | <a href="#">SmEgg103.02502.02502.2</a> | 3.5353 | 0.3303 | 99.9%        | 1528.51 | 1528.6616 | 1   | 5.822                                                               | 58.3% |  |
|   | <a href="#">SmEgg205.02669.02669.2</a> | 3.0973 | 0.3014 | 99.8%        | 1293.69 | 1293.4833 | 9   | 5.825                                                               | 70.0% |  |
|   | <a href="#">SmEgg203.04455.04455.2</a> | 3.9858 | 0.3597 | 100.0%       | 2333.58 | 2332.6982 | 1   | 6.245                                                               | 52.8% |  |
| 2 | <a href="#">SmEgg202.02685.02685.1</a> | 1.9424 | 0.2499 | 98.5%        | 1513.54 | 1514.6757 | 1   | 5.025                                                               | 50.0% |  |
| 2 | <a href="#">SmEgg202.02692.02692.2</a> | 4.3662 | 0.2714 | 100.0%       | 1513.93 | 1514.6757 | 1   | 5.927                                                               | 80.8% |  |
|   | <a href="#">SmEgg302.03362.03362.2</a> | 3.2748 | 0.1866 | 99.4%        | 2225.27 | 2226.4485 | 2   | 4.93                                                                | 44.7% |  |
| * | <a href="#">SmEgg202.03205.03205.2</a> | 3.4565 | 0.1015 | 98.0%        | 2030.59 | 2031.1897 | 1   | 4.715                                                               | 53.3% |  |
| * | <a href="#">SmEgg203.01852.01852.1</a> | 2.7488 | 0.2487 | 100.0%       | 1139.49 | 1140.2412 | 2   | 4.953                                                               | 66.7% |  |
| * | <a href="#">SmEgg103.01791.01791.2</a> | 2.1252 | 0.2685 | 96.3%        | 1140.18 | 1140.2412 | 96  | 4.868                                                               | 61.1% |  |
|   | <a href="#">SmEgg203.02318.02318.2</a> | 3.9678 | 0.4198 | 100.0%       | 1930.59 | 1931.1676 | 1   | 7.252                                                               | 66.7% |  |
| * | <a href="#">SmEgg203.04430.04430.2</a> | 4.5681 | 0.3723 | 100.0%       | 2367.91 | 2368.7095 | 1   | 7.41                                                                | 52.6% |  |
|   | <a href="#">SmEgg202.01833.01833.1</a> | 2.058  | 0.2615 | 100.0%       | 971.49  | 972.0491  | 28  | 5.083                                                               | 64.3% |  |
| * | <a href="#">SmEgg206.00188.00188.2</a> | 4.3711 | 0.3747 | 100.0%       | 2379.97 | 2377.74   | 1   | 6.039                                                               | 50.0% |  |

Similarities: [TC286163|1-181\(6:10\)](#)[TC35744|3|20-132\(1:15\)](#)

| U | <b>TC23883 5 1-187</b>                 | 8      | 19     | <b>38.5%</b> | 187     | 21393     | 5.3 | no description |       |  |
|---|----------------------------------------|--------|--------|--------------|---------|-----------|-----|----------------|-------|--|
|   | Filename                               | XCorr  | DeltCN | Conf%        | ObsM+H+ | CalcM+H+  | SpR | ZScore         | Ion%  |  |
| * | <a href="#">SmEgg203.03140.03140.3</a> | 4.3328 | 0.3104 | 100.0%       | 3318.43 | 3317.577  | 1   | 6.196          | 26.7% |  |
| * | <a href="#">SmEgg304.03570.03570.3</a> | 4.7758 | 0.3781 | 100.0%       | 3627.92 | 3627.9294 | 3   | 6.136          | 22.6% |  |
| * | <a href="#">SmEgg403.03715.03715.2</a> | 2.5591 | 0.1843 | 98.3%        | 1211.97 | 1212.347  | 2   | 3.548          | 75.0% |  |
| * | <a href="#">SmEgg204.02982.02982.2</a> | 4.219  | 0.2936 | 100.0%       | 1599.63 | 1599.7522 | 1   | 6.211          | 72.7% |  |
|   | <a href="#">SmEgg105.02837.02837.3</a> | 4.6557 | 0.337  | 100.0%       | 3467.01 | 3465.8    | 1   | 5.969          | 26.7% |  |
|   | <a href="#">SmEgg404.02902.02902.2</a> | 3.3278 | 0.4871 | 100.0%       | 2928.2  | 2930.0981 | 1   | 8.861          | 40.0% |  |
|   | <a href="#">SmEgg302.02588.02588.2</a> | 2.7738 | 0.2046 | 97.4%        | 2574.2  | 2575.6887 | 1   | 4.635          | 40.9% |  |
|   | <a href="#">SmEgg402.02884.02884.2</a> | 3.31   | 0.4012 | 99.9%        | 2461.61 | 2462.5293 | 1   | 7.156          | 52.4% |  |

| U | <b>TC20578 1 20-337</b>                | 8      | 13     | <b>38.4%</b> | 318     | 35180     | 8.9 | similar to UP Q5DF59_SCHJA (Q5DF59) SJCHGC01367 protein, partial (95%) |       |  |
|---|----------------------------------------|--------|--------|--------------|---------|-----------|-----|------------------------------------------------------------------------|-------|--|
|   | Filename                               | XCorr  | DeltCN | Conf%        | ObsM+H+ | CalcM+H+  | SpR | ZScore                                                                 | Ion%  |  |
| * | <a href="#">SmEgg206.00010.00010.2</a> | 3.2367 | 0.2668 | 99.7%        | 2890.84 | 2892.3113 | 1   | 5.378                                                                  | 39.6% |  |
|   | <a href="#">SmEgg203.03310.03310.2</a> | 3.3202 | 0.3518 | 99.8%        | 1937.53 | 1938.1907 | 1   | 5.751                                                                  | 50.0% |  |
|   | <a href="#">SmEgg305.02075.02075.2</a> | 3.1389 | 0.2728 | 99.8%        | 1310.53 | 1311.524  | 11  | 5.518                                                                  | 54.2% |  |
|   | <a href="#">SmEgg105.02849.02849.2</a> | 4.202  | 0.4016 | 100.0%       | 1711.59 | 1712.0605 | 1   | 7.166                                                                  | 56.2% |  |
|   | <a href="#">SmEgg206.02500.02500.2</a> | 3.7434 | 0.3879 | 100.0%       | 2525.92 | 2526.7803 | 1   | 7.05                                                                   | 45.2% |  |
|   | <a href="#">SmEgg202.03125.03125.2</a> | 3.5766 | 0.2389 | 99.8%        | 1699.05 | 1699.9011 | 1   | 7.315                                                                  | 71.4% |  |
|   | <a href="#">SmEgg203.04354.04354.2</a> | 3.0873 | 0.231  | 99.5%        | 2730.85 | 2731.0776 | 4   | 5.541                                                                  | 30.4% |  |

SmEgg205.02927.02927.2 3.596 0.3695 99.9% 1700.88 1699.881 1 7.093 57.7%  
 Similarities: [TC22126|1|49-346](#)(7:1)

U **TC25928|2|209-370** 4 7 **38.3%** 162 17940 5.8 similar to UP|Q5D8I3\_SCHJA (Q5D8I3)  
 SJCHGC06636 protein, complete

|   | Filename                               | XCorr  | DeltCN | Conf%  | ObsM+H+ | CalcM+H+  | SpR | ZScore | Ion%  | # |
|---|----------------------------------------|--------|--------|--------|---------|-----------|-----|--------|-------|---|
| * | <a href="#">SmEgg105.02975.02975.2</a> | 4.1198 | 0.3885 | 100.0% | 2306.79 | 2307.6523 | 1   | 7.555  | 45.5% | 1 |
| * | <a href="#">SmEgg105.03142.03142.2</a> | 4.1335 | 0.3693 | 100.0% | 1764.8  | 1765.0629 | 1   | 6.371  | 52.9% | 1 |
| * | <a href="#">SmEgg203.03803.03803.2</a> | 5.2475 | 0.4727 | 100.0% | 1725.68 | 1724.9084 | 1   | 8.736  | 84.4% | 1 |
| * | <a href="#">SmEgg102.04561.04561.2</a> | 3.3372 | 0.3107 | 99.8%  | 2503.69 | 2503.734  | 1   | 5.237  | 42.9% | 1 |

U **TC26473|3|1-106** 9 18 **37.7%** 106 11864 11.0 homologue to UP|Q5DGT3\_SCHJA (Q5DGT3)  
 SJCHGC01604 protein, partial (88%)

U **TC26516|1|1-129** 9 18 **31.0%** 129 14507 10.4 homologue to UP|Q5DGT3\_SCHJA (Q5DGT3)  
 SJCHGC01604 protein, complete

|  | Filename                               | XCorr  | DeltCN | Conf%  | ObsM+H+ | CalcM+H+  | SpR | ZScore | Ion%  | # |
|--|----------------------------------------|--------|--------|--------|---------|-----------|-----|--------|-------|---|
|  | <a href="#">SmEgg104.01386.01386.2</a> | 2.6657 | 0.2418 | 99.3%  | 1169.14 | 1169.2798 | 3   | 5.455  | 75.0% | 1 |
|  | <a href="#">SmEgg204.01560.01560.1</a> | 2.1554 | 0.22   | 98.7%  | 941.51  | 942.0165  | 1   | 4.549  | 62.5% | 2 |
|  | <a href="#">SmEgg204.01577.01577.2</a> | 2.5456 | 0.1661 | 97.6%  | 942.28  | 942.0165  | 50  | 3.899  | 75.0% | 1 |
|  | <a href="#">SmEgg104.04233.04233.2</a> | 4.6813 | 0.464  | 100.0% | 1774.44 | 1775.0474 | 1   | 8.412  | 64.3% | 4 |
|  | <a href="#">SmEgg405.04007.04007.2</a> | 3.6035 | 0.2663 | 99.9%  | 1425.51 | 1425.584  | 1   | 6.186  | 77.3% | 3 |
|  | <a href="#">SmEgg203.00905.00905.1</a> | 2.4464 | 0.2183 | 100.0% | 828.34  | 828.9004  | 1   | 5.473  | 71.4% | 3 |
|  | <a href="#">SmEgg203.00966.00966.2</a> | 2.4835 | 0.2101 | 99.1%  | 828.43  | 828.9004  | 2   | 4.654  | 78.6% | 2 |
|  | <a href="#">SmEgg303.00887.00887.1</a> | 2.1014 | 0.2171 | 97.2%  | 1090.55 | 1091.2499 | 1   | 4.658  | 55.0% | 1 |
|  | <a href="#">SmEgg303.00903.00903.2</a> | 2.4377 | 0.1976 | 96.2%  | 1090.78 | 1091.2499 | 7   | 4.665  | 60.0% | 1 |

U **CD188921|6|11-131** 3 6 **37.2%** 121 13578 4.6 similar to SP|O02192|HS83\_DROAV Heat  
 shock protein 83 (HSP 82). [Fruit fly]  
 {Drosophila auraria}, partial (17%)

|   | Filename                               | XCorr  | DeltCN | Conf%  | ObsM+H+ | CalcM+H+  | SpR | ZScore | Ion%  | # |
|---|----------------------------------------|--------|--------|--------|---------|-----------|-----|--------|-------|---|
|   | <a href="#">SmEgg102.02114.02114.1</a> | 2.6038 | 0.2982 | 100.0% | 1275.56 | 1276.3861 | 4   | 6.098  | 59.1% | 1 |
|   | <a href="#">SmEgg202.03040.03040.2</a> | 4.5165 | 0.3663 | 100.0% | 1898.35 | 1899.12   | 1   | 6.955  | 75.0% | 1 |
| * | <a href="#">SmEgg202.02960.02960.2</a> | 3.93   | 0.4375 | 100.0% | 1607.53 | 1607.8597 | 1   | 7.669  | 63.3% | 1 |

Similarities: [TC28616|3|1-181](#)(1:2)  
[TC22499|3|13-820](#)(1:2)

U **TC29554|3|17-105** 3 7 **37.1%** 89 10276 7.5 similar to UP|DYL1\_CHLRE (Q39580) Dynein 8  
 kDa light chain, flagellar outer arm, partial (97%)

|   | Filename                               | XCorr | DeltCN | Conf%  | ObsM+H+ | CalcM+H+  | SpR | ZScore | Ion%  | # |
|---|----------------------------------------|-------|--------|--------|---------|-----------|-----|--------|-------|---|
| * | <a href="#">SmEgg102.03720.03720.2</a> | 4.801 | 0.319  | 100.0% | 2471.27 | 2472.6577 | 1   | 7.448  | 52.4% | 2 |
|   | <a href="#">SmEgg104.01906.01906.1</a> | 2.314 | 0.1918 | 96.8%  | 1282.55 | 1283.383  | 1   | 4.43   | 55.0% | 3 |
|   | <a href="#">SmEgg104.01907.01907.2</a> | 3.026 | 0.2775 | 99.8%  | 1283.41 | 1283.383  | 1   | 5.564  | 70.0% | 2 |

Similarities: [TC23427|2|20-100](#)(2:1)  
[TC20533|3|20-107](#)(2:1)

U **TC22126|1|49-346** 8 14 **36.6%** 298 33066 7.5 similar to UP|Q5DF59\_SCHJA (Q5DF59)  
 SJCHGC01367 protein, complete

|   | Filename                               | XCorr  | DeltCN | Conf%  | ObsM+H+ | CalcM+H+  | SpR | ZScore | Ion%  | # |
|---|----------------------------------------|--------|--------|--------|---------|-----------|-----|--------|-------|---|
|   | <a href="#">SmEgg203.03310.03310.2</a> | 3.3202 | 0.3518 | 99.8%  | 1937.53 | 1938.1907 | 1   | 5.751  | 50.0% | 1 |
|   | <a href="#">SmEgg305.02075.02075.2</a> | 3.1389 | 0.2728 | 99.8%  | 1310.53 | 1311.524  | 11  | 5.518  | 54.2% | 1 |
|   | <a href="#">SmEgg105.02849.02849.2</a> | 4.202  | 0.4016 | 100.0% | 1711.59 | 1712.0605 | 1   | 7.166  | 56.2% | 1 |
|   | <a href="#">SmEgg206.02500.02500.2</a> | 3.7434 | 0.3879 | 100.0% | 2525.92 | 2526.7803 | 1   | 7.05   | 45.2% | 1 |
|   | <a href="#">SmEgg202.03125.03125.2</a> | 3.5766 | 0.2389 | 99.8%  | 1699.05 | 1699.9011 | 1   | 7.315  | 71.4% | 1 |
|   | <a href="#">SmEgg203.04354.04354.2</a> | 3.0873 | 0.231  | 99.5%  | 2730.85 | 2731.0776 | 4   | 5.541  | 30.4% | 1 |
|   | <a href="#">SmEgg205.02927.02927.2</a> | 3.596  | 0.3695 | 99.9%  | 1700.88 | 1699.881  | 1   | 7.093  | 57.7% | 1 |
| * | <a href="#">SmEgg103.02226.02226.2</a> | 3.5372 | 0.2125 | 99.8%  | 1436.14 | 1436.6049 | 2   | 4.649  | 77.3% | 1 |

Similarities: [TC20578|1|20-337](#)(7:1)

| U | <b>AM045578 3 19-90</b>                | 2      | 6      | <a href="#">36.1%</a> | 72      | 8143      | 4.9 | no description |       |   |  |
|---|----------------------------------------|--------|--------|-----------------------|---------|-----------|-----|----------------|-------|---|--|
|   | Filename                               | XCorr  | DeltCN | Conf%                 | ObsM+H+ | CalcM+H+  | SpR | ZScore         | Ion%  | # |  |
| * | <a href="#">SmEgg205.04022.04022.2</a> | 3.8214 | 0.3074 | 99.9%                 | 2914.22 | 2915.2695 | 1   | 6.065          | 40.0% | 4 |  |
| * | <a href="#">SmEgg105.03962.03962.3</a> | 4.2846 | 0.3494 | 100.0%                | 2915.83 | 2915.2695 | 1   | 7.098          | 28.0% | 4 |  |

| U | <b>TC25273 2 19-640</b>                | 14     | 24     | <a href="#">35.7%</a> | 622     | 66890     | 7.4 | similar to UP Q817C2_ECHMU (Q817C2)<br>Transketolase, partial (80%) |       |   |  |
|---|----------------------------------------|--------|--------|-----------------------|---------|-----------|-----|---------------------------------------------------------------------|-------|---|--|
|   | Filename                               | XCorr  | DeltCN | Conf%                 | ObsM+H+ | CalcM+H+  | SpR | ZScore                                                              | Ion%  | # |  |
| * | <a href="#">SmEgg206.03388.03388.2</a> | 3.397  | 0.2109 | 99.8%                 | 2650.25 | 2649.985  | 10  | 5.001                                                               | 34.0% | 4 |  |
| * | <a href="#">SmEgg204.04285.04285.2</a> | 3.6922 | 0.179  | 99.8%                 | 2014.55 | 2015.3195 | 1   | 5.283                                                               | 55.9% | 4 |  |
| * | <a href="#">SmEgg206.03346.03346.2</a> | 4.4171 | 0.5006 | 100.0%                | 2903.32 | 2903.1372 | 1   | 9.422                                                               | 44.0% | 4 |  |
| * | <a href="#">SmEgg205.02733.02733.2</a> | 2.8388 | 0.263  | 99.3%                 | 2294.02 | 2294.5315 | 3   | 5.435                                                               | 37.5% | 4 |  |
| * | <a href="#">SmEgg303.02644.02644.2</a> | 2.6965 | 0.3185 | 99.7%                 | 1824.56 | 1824.9902 | 1   | 5.365                                                               | 53.3% | 4 |  |
| * | <a href="#">SmEgg202.03555.03555.3</a> | 5.0208 | 0.3867 | 100.0%                | 3543.55 | 3544.8574 | 1   | 7.181                                                               | 31.5% | 4 |  |
| * | <a href="#">SmEgg304.02460.02460.2</a> | 2.2864 | 0.2653 | 95.3%                 | 1959.22 | 1960.1981 | 2   | 5.412                                                               | 41.2% | 4 |  |
| * | <a href="#">SmEgg304.02575.02575.2</a> | 2.7393 | 0.149  | 95.7%                 | 1654.0  | 1653.8413 | 6   | 3.596                                                               | 54.2% | 4 |  |
| * | <a href="#">SmEgg202.02755.02755.2</a> | 3.0307 | 0.3099 | 99.8%                 | 1916.65 | 1916.0947 | 4   | 5.772                                                               | 41.2% | 4 |  |
| * | <a href="#">SmEgg105.02701.02701.2</a> | 4.0795 | 0.2896 | 99.9%                 | 2352.9  | 2353.569  | 1   | 5.751                                                               | 42.1% | 4 |  |
| * | <a href="#">SmEgg303.03928.03928.2</a> | 3.1587 | 0.0962 | 95.7%                 | 1684.23 | 1685.0135 | 14  | 3.886                                                               | 57.1% | 4 |  |
| * | <a href="#">SmEgg104.03575.03575.2</a> | 3.5435 | 0.1544 | 99.5%                 | 1882.93 | 1884.2665 | 2   | 4.827                                                               | 59.4% | 4 |  |
| * | <a href="#">SmEgg203.03475.03475.2</a> | 4.2623 | 0.2772 | 99.9%                 | 2694.05 | 2695.9526 | 1   | 6.203                                                               | 42.3% | 4 |  |
| * | <a href="#">SmEgg203.03479.03479.3</a> | 4.6057 | 0.3046 | 100.0%                | 2695.45 | 2695.9526 | 1   | 6.513                                                               | 33.7% | 4 |  |

| U | <b>TC21331 1 18-298</b>                | 14     | 34     | <a href="#">35.6%</a> | 281     | 30565     | 7.2 | UP Q9BMI9_SCHMA (Q9BMI9)<br>Purine-nucleoside phosphorylase, complete |       |   |  |
|---|----------------------------------------|--------|--------|-----------------------|---------|-----------|-----|-----------------------------------------------------------------------|-------|---|--|
|   | Filename                               | XCorr  | DeltCN | Conf%                 | ObsM+H+ | CalcM+H+  | SpR | ZScore                                                                | Ion%  | # |  |
| * | <a href="#">SmEgg103.03518.03518.2</a> | 3.483  | 0.3652 | 99.9%                 | 1813.99 | 1815.1266 | 1   | 6.711                                                                 | 52.9% | 4 |  |
| * | <a href="#">SmEgg104.02789.02789.2</a> | 5.6074 | 0.4771 | 100.0%                | 2014.63 | 2014.2628 | 1   | 9.227                                                                 | 81.2% | 4 |  |
| * | <a href="#">SmEgg303.02996.02996.2</a> | 2.6774 | 0.2722 | 98.8%                 | 1665.3  | 1665.9019 | 2   | 5.047                                                                 | 57.1% | 4 |  |
| * | <a href="#">SmEgg104.02203.02203.2</a> | 4.0742 | 0.2206 | 99.9%                 | 1316.42 | 1316.5614 | 1   | 5.652                                                                 | 79.2% | 4 |  |
| * | <a href="#">SmEgg203.02900.02900.2</a> | 3.1552 | 0.0953 | 99.7%                 | 905.16  | 905.12524 | 6   | 3.987                                                                 | 92.9% | 4 |  |
| * | <a href="#">SmEgg306.02540.02540.1</a> | 2.867  | 0.24   | 100.0%                | 1340.73 | 1340.5651 | 1   | 4.918                                                                 | 63.6% | 4 |  |
| * | <a href="#">SmEgg106.03074.03074.3</a> | 5.2356 | 0.3575 | 100.0%                | 2766.9  | 2768.1013 | 1   | 6.617                                                                 | 40.6% | 4 |  |
| * | <a href="#">SmEgg106.03072.03072.2</a> | 4.6652 | 0.3137 | 100.0%                | 2768.15 | 2768.1013 | 1   | 6.837                                                                 | 50.0% | 4 |  |
| * | <a href="#">SmEgg306.02802.02802.2</a> | 4.0771 | 0.3403 | 100.0%                | 2002.48 | 2003.2651 | 1   | 7.303                                                                 | 61.8% | 4 |  |
| * | <a href="#">SmEgg305.03127.03127.2</a> | 3.4294 | 0.2854 | 99.8%                 | 2089.38 | 2090.3433 | 1   | 6.046                                                                 | 52.8% | 4 |  |
| * | <a href="#">SmEgg305.03059.03059.2</a> | 3.8551 | 0.417  | 100.0%                | 2203.82 | 2204.4473 | 1   | 7.498                                                                 | 50.0% | 4 |  |
| * | <a href="#">SmEgg304.02887.02887.2</a> | 3.8395 | 0.3973 | 100.0%                | 1662.75 | 1662.8424 | 1   | 7.24                                                                  | 50.0% | 4 |  |
| * | <a href="#">SmEgg305.03271.03271.1</a> | 3.0282 | 0.3169 | 100.0%                | 1562.74 | 1563.7098 | 2   | 5.666                                                                 | 50.0% | 4 |  |
| * | <a href="#">SmEgg305.02151.02151.2</a> | 3.4714 | 0.0847 | 99.4%                 | 1360.61 | 1360.6366 | 4   | 3.927                                                                 | 75.0% | 4 |  |

| U | <b>TC31314 4 1-91</b>                  | 2      | 3      | <a href="#">35.2%</a> | 91      | 9986      | 6.8 | similar to UP Q5DHW9_SCHJA (Q5DHW9)<br>SJCHGC07198 protein, partial (51%) |       |   |  |
|---|----------------------------------------|--------|--------|-----------------------|---------|-----------|-----|---------------------------------------------------------------------------|-------|---|--|
|   | Filename                               | XCorr  | DeltCN | Conf%                 | ObsM+H+ | CalcM+H+  | SpR | ZScore                                                                    | Ion%  | # |  |
| * | <a href="#">SmEgg202.03500.03500.2</a> | 3.7807 | 0.3436 | 99.9%                 | 2057.47 | 2056.1995 | 1   | 5.662                                                                     | 53.1% | 2 |  |
| * | <a href="#">SmEgg206.02576.02576.2</a> | 3.203  | 0.1609 | 98.6%                 | 1665.02 | 1663.9573 | 3   | 4.43                                                                      | 60.7% | 1 |  |

| U | <b>TC27048 2 1-499</b>                 | 15     | 28     | <a href="#">35.1%</a> | 499     | 54603     | 8.7 | homologue to UP Q94747_SCHMA (Q94747)<br>Elongation factor 1-alpha, complete |       |   |  |
|---|----------------------------------------|--------|--------|-----------------------|---------|-----------|-----|------------------------------------------------------------------------------|-------|---|--|
|   | Filename                               | XCorr  | DeltCN | Conf%                 | ObsM+H+ | CalcM+H+  | SpR | ZScore                                                                       | Ion%  | # |  |
|   | <a href="#">SmEgg205.02361.02361.2</a> | 2.4675 | 0.2393 | 98.6%                 | 1105.21 | 1105.2792 | 1   | 5.664                                                                        | 72.2% | 4 |  |
|   | <a href="#">SmEgg205.02190.02190.2</a> | 2.8205 | 0.2177 | 99.7%                 | 1064.93 | 1065.2174 | 3   | 4.397                                                                        | 77.8% | 4 |  |
|   | <a href="#">SmEgg106.03573.03573.3</a> | 4.2356 | 0.253  | 99.3%                 | 2942.91 | 2943.323  | 1   | 6.302                                                                        | 31.2% | 4 |  |
|   | <a href="#">SmEgg305.03281.03281.2</a> | 2.9044 | 0.2726 | 99.8%                 | 1166.46 | 1167.3704 | 1   | 5.617                                                                        | 81.2% | 4 |  |
|   | <a href="#">SmEgg304.02478.02478.2</a> | 2.8908 | 0.2671 | 99.5%                 | 2096.51 | 2097.3733 | 1   | 5.817                                                                        | 44.4% | 4 |  |



|   |                                        |        |        |        |         |           |   |       |       |   |
|---|----------------------------------------|--------|--------|--------|---------|-----------|---|-------|-------|---|
|   | <a href="#">SmEgg202.03891.03891.2</a> | 4.3074 | 0.3473 | 100.0% | 1625.85 | 1624.8285 | 1 | 6.657 | 75.0% | : |
|   | <a href="#">SmEgg204.04200.04200.2</a> | 4.3132 | 0.4453 | 100.0% | 2305.54 | 2306.6362 | 1 | 7.853 | 47.5% | : |
| 2 | <a href="#">SmEgg106.02542.02542.2</a> | 2.8107 | 0.1147 | 96.4%  | 1342.5  | 1342.6243 | 1 | 4.392 | 65.0% | : |
|   | <a href="#">SmEgg105.02295.02295.2</a> | 3.1695 | 0.2427 | 99.8%  | 1026.01 | 1026.2241 | 3 | 5.307 | 85.0% | : |
|   | <a href="#">SmEgg204.03137.03137.2</a> | 3.8498 | 0.1094 | 99.5%  | 1844.42 | 1845.2073 | 2 | 4.597 | 52.9% | : |
|   | <a href="#">SmEgg105.03170.03170.2</a> | 4.8106 | 0.1919 | 99.9%  | 2501.87 | 2502.9722 | 1 | 7.859 | 41.3% | : |
|   | <a href="#">SmEgg204.01801.01801.2</a> | 2.7558 | 0.1775 | 99.2%  | 1025.18 | 1025.1527 | 1 | 4.64  | 81.2% | : |
|   | <a href="#">SmEgg204.02101.02101.2</a> | 3.0022 | 0.1953 | 98.6%  | 1945.3  | 1944.0864 | 1 | 4.249 | 53.1% | : |
| 2 | <a href="#">SmEgg205.02297.02297.2</a> | 4.0671 | 0.387  | 100.0% | 1772.62 | 1772.9307 | 1 | 6.763 | 60.7% | : |
| * | <a href="#">SmEgg105.03079.03079.2</a> | 4.1713 | 0.3829 | 100.0% | 1821.19 | 1820.0643 | 1 | 7.103 | 71.4% | : |

**U TC30449|2|73-609** 14 26 **34.3%** 537 58106 5.6  
 homologue to UP|Q5D9S4\_SCHJA (Q5D9S4) SJCHGC09424 protein, partial (91%)

|   | Filename                               | XCorr  | DeltCN | Conf%  | ObsM+H+ | CalcM+H+  | SpR | ZScore | Ion%  | : |
|---|----------------------------------------|--------|--------|--------|---------|-----------|-----|--------|-------|---|
| * | <a href="#">SmEgg204.01708.01708.2</a> | 3.8945 | 0.3738 | 100.0% | 1442.4  | 1442.6151 | 1   | 6.982  | 73.3% | : |
| * | <a href="#">SmEgg103.00957.00957.2</a> | 3.3814 | 0.1019 | 99.4%  | 944.25  | 944.0354  | 1   | 4.883  | 75.0% | : |
| * | <a href="#">SmEgg304.03003.03003.2</a> | 3.424  | 0.2876 | 99.8%  | 1910.66 | 1910.1437 | 1   | 5.373  | 55.9% | : |
|   | <a href="#">SmEgg204.02166.02166.1</a> | 2.4504 | 0.3061 | 100.0% | 1038.55 | 1039.2198 | 1   | 5.797  | 66.7% | : |
|   | <a href="#">SmEgg305.02119.02119.2</a> | 3.088  | 0.18   | 98.6%  | 1767.77 | 1767.0354 | 1   | 4.636  | 60.0% | : |
|   | <a href="#">SmEgg105.02638.02638.1</a> | 2.3154 | 0.2222 | 99.3%  | 975.52  | 976.1637  | 1   | 4.658  | 75.0% | : |
| * | <a href="#">SmEgg205.04345.04345.2</a> | 4.4168 | 0.2118 | 99.9%  | 1500.43 | 1500.8401 | 8   | 5.353  | 70.8% | : |
| * | <a href="#">SmEgg102.04760.04760.2</a> | 4.9126 | 0.434  | 100.0% | 1908.64 | 1909.1057 | 1   | 7.367  | 70.0% | : |
|   | <a href="#">SmEgg305.02740.02740.2</a> | 2.911  | 0.3754 | 99.8%  | 1891.92 | 1891.1926 | 1   | 6.409  | 50.0% | : |
| * | <a href="#">SmEgg202.03331.03331.2</a> | 3.6117 | 0.3381 | 99.9%  | 2001.69 | 2002.2316 | 1   | 5.782  | 52.8% | : |
| * | <a href="#">SmEgg103.02375.02375.2</a> | 3.4415 | 0.29   | 99.8%  | 1811.74 | 1813.0201 | 1   | 5.929  | 66.7% | : |
| * | <a href="#">SmEgg104.04638.04638.2</a> | 3.2712 | 0.2372 | 99.8%  | 2147.72 | 2148.39   | 1   | 5.686  | 44.4% | : |
| * | <a href="#">SmEgg206.03446.03446.2</a> | 3.0646 | 0.2709 | 99.8%  | 2704.85 | 2705.0527 | 2   | 5.492  | 32.6% | : |
| * | <a href="#">SmEgg205.03953.03953.2</a> | 3.9319 | 0.259  | 99.8%  | 1738.56 | 1739.0269 | 1   | 5.729  | 78.6% | : |

**U TC19797|1|21-600** 15 32 **34.1%** 580 63039 6.8  
 GB|AAK85233.1|15149312|AF395822 thioredoxin glutathione reductase {Schistosoma mansoni} (exp=-1; wgp=0; cg=0), complete

|   | Filename                               | XCorr  | DeltCN | Conf%  | ObsM+H+ | CalcM+H+  | SpR | ZScore | Ion%  | : |
|---|----------------------------------------|--------|--------|--------|---------|-----------|-----|--------|-------|---|
|   | <a href="#">SmEgg103.02263.02263.2</a> | 5.1399 | 0.399  | 100.0% | 1826.9  | 1826.0165 | 1   | 7.31   | 71.9% | : |
| * | <a href="#">SmEgg103.03797.03797.3</a> | 4.6213 | 0.4132 | 100.0% | 3175.77 | 3177.5537 | 1   | 6.97   | 27.6% | : |
| * | <a href="#">SmEgg103.03791.03791.2</a> | 4.3136 | 0.4557 | 100.0% | 3177.96 | 3177.5537 | 1   | 9.189  | 37.9% | : |
|   | <a href="#">SmEgg104.02012.02012.1</a> | 2.8086 | 0.214  | 100.0% | 1379.66 | 1380.584  | 4   | 4.881  | 63.6% | : |
|   | <a href="#">SmEgg105.02129.02129.2</a> | 2.5303 | 0.1974 | 97.7%  | 1098.37 | 1098.331  | 6   | 3.662  | 72.2% | : |
| * | <a href="#">SmEgg105.04017.04017.2</a> | 4.8433 | 0.5369 | 100.0% | 2876.06 | 2877.2195 | 1   | 10.45  | 50.0% | : |
| * | <a href="#">SmEgg303.03884.03884.2</a> | 3.0932 | 0.2073 | 99.1%  | 1700.51 | 1700.9287 | 1   | 5.14   | 53.6% | : |
| * | <a href="#">SmEgg302.02100.02100.2</a> | 2.6357 | 0.3011 | 99.2%  | 1795.49 | 1795.9362 | 1   | 5.859  | 50.0% | : |
| * | <a href="#">SmEgg104.02187.02187.2</a> | 3.3531 | 0.2415 | 99.7%  | 1639.23 | 1639.9329 | 18  | 5.083  | 46.4% | : |
| * | <a href="#">SmEgg203.03151.03151.3</a> | 5.0591 | 0.3629 | 100.0% | 3802.46 | 3803.184  | 1   | 6.59   | 26.4% | : |
| * | <a href="#">SmEgg304.02882.02882.2</a> | 2.8603 | 0.3547 | 99.8%  | 2182.43 | 2183.5125 | 1   | 5.597  | 40.0% | : |
| * | <a href="#">SmEgg304.02463.02463.2</a> | 3.434  | 0.1251 | 98.6%  | 1806.81 | 1807.1002 | 2   | 5.287  | 50.0% | : |
| * | <a href="#">SmEgg304.02571.02571.2</a> | 3.8232 | 0.383  | 100.0% | 1877.7  | 1878.179  | 3   | 6.643  | 44.4% | : |
| * | <a href="#">SmEgg303.02580.02580.2</a> | 3.7405 | 0.3395 | 99.9%  | 2173.01 | 2174.3228 | 1   | 6.561  | 50.0% | : |
|   | <a href="#">SmEgg305.02591.02591.2</a> | 3.1811 | 0.4149 | 99.9%  | 1626.39 | 1626.8094 | 1   | 7.137  | 56.7% | : |

**U TC25345|1|21-173** 5 13 **34.0%** 153 16914 9.7  
 similar to UP|Q60501\_9RODE (Q60501) Hamster p7 preinsertion DNA, partial (9%)

|  | Filename                               | XCorr  | DeltCN | Conf% | ObsM+H+ | CalcM+H+  | SpR | ZScore | Ion%  | : |
|--|----------------------------------------|--------|--------|-------|---------|-----------|-----|--------|-------|---|
|  | <a href="#">SmEgg303.03548.03548.2</a> | 2.7975 | 0.1913 | 97.0% | 2442.18 | 2442.6472 | 1   | 4.488  | 42.1% | : |
|  | <a href="#">SmEgg202.03019.03019.2</a> | 3.3317 | 0.1949 | 99.8% | 1263.18 | 1263.3893 | 1   | 4.495  | 77.8% | : |

|   |                                        |        |        |        |         |           |   |       |       |   |
|---|----------------------------------------|--------|--------|--------|---------|-----------|---|-------|-------|---|
|   | <a href="#">SmEgg102.02927.02927.1</a> | 2.7774 | 0.2649 | 100.0% | 1264.59 | 1263.3893 | 2 | 5.587 | 66.7% | 4 |
| * | <a href="#">SmEgg302.01887.01887.2</a> | 3.1148 | 0.2174 | 99.5%  | 1708.33 | 1709.8046 | 7 | 5.499 | 50.0% | : |
| * | <a href="#">SmEgg103.01362.01362.2</a> | 4.5423 | 0.4313 | 100.0% | 1690.39 | 1690.8076 | 1 | 8.253 | 66.7% | ! |

|   |                                        |              |               |                       |                |                 |            |                                                                                                    |             |   |
|---|----------------------------------------|--------------|---------------|-----------------------|----------------|-----------------|------------|----------------------------------------------------------------------------------------------------|-------------|---|
| U | <b>TC31250 1 11-87</b>                 | 3            | 3             | <a href="#">33.8%</a> | 77             | 8813            | 5.7        | homologue to UP Q8MNZ8_SCHMA (Q8MNZ8)<br>Egg secreted protein ESP15 precursor (Fragment), complete |             |   |
|   | <b>Filename</b>                        | <b>XCorr</b> | <b>DeltCN</b> | <b>Conf%</b>          | <b>ObsM+H+</b> | <b>CalcM+H+</b> | <b>SpR</b> | <b>ZScore</b>                                                                                      | <b>Ion%</b> | : |
| * | <a href="#">SmEgg102.00858.00858.1</a> | 1.9256       | 0.2231        | 96.0%                 | 1126.36        | 1127.1255       | 338        | 4.831                                                                                              | 50.0%       | : |
| * | <a href="#">SmEgg202.01179.01179.1</a> | 2.2631       | 0.1991        | 99.3%                 | 981.39         | 982.054         | 2          | 4.833                                                                                              | 71.4%       | : |
| * | <a href="#">SmEgg102.02027.02027.2</a> | 3.0425       | 0.1785        | 99.8%                 | 1055.18        | 1056.0802       | 88         | 4.088                                                                                              | 78.6%       | : |

|   |                                        |              |               |                       |                |                 |            |                                                  |             |   |
|---|----------------------------------------|--------------|---------------|-----------------------|----------------|-----------------|------------|--------------------------------------------------|-------------|---|
| U | <b>TC32067 3 19-472</b>                | 18           | 34            | <a href="#">33.7%</a> | 454            | 50350           | 5.1        | UP Q26595_SCHMA (Q26595) Alpha tubulin, complete |             |   |
|   | <b>Filename</b>                        | <b>XCorr</b> | <b>DeltCN</b> | <b>Conf%</b>          | <b>ObsM+H+</b> | <b>CalcM+H+</b> | <b>SpR</b> | <b>ZScore</b>                                    | <b>Ion%</b> | : |
|   | <a href="#">SmEgg202.03199.03199.2</a> | 4.2903       | 0.3823        | 100.0%                | 2008.76        | 2009.093        | 1          | 7.544                                            | 50.0%       | : |
|   | <a href="#">SmEgg102.03186.03186.2</a> | 4.5123       | 0.3914        | 100.0%                | 1688.51        | 1688.9182       | 1          | 6.962                                            | 75.0%       | : |
|   | <a href="#">SmEgg202.03169.03169.2</a> | 3.8057       | 0.2463        | 99.8%                 | 1618.37        | 1617.8395       | 14         | 5.068                                            | 69.2%       | : |
|   | <a href="#">SmEgg302.03294.03294.2</a> | 2.8324       | 0.1946        | 97.5%                 | 2038.77        | 2040.2775       | 1          | 5.602                                            | 44.1%       | : |
|   | <a href="#">SmEgg402.03594.03594.2</a> | 3.1045       | 0.2187        | 99.5%                 | 1940.82        | 1941.1449       | 1          | 4.745                                            | 46.9%       | : |
|   | <a href="#">SmEgg206.02442.02442.2</a> | 4.1128       | 0.2955        | 99.9%                 | 2288.73        | 2288.5247       | 1          | 6.069                                            | 52.6%       | : |
|   | <a href="#">SmEgg205.02567.02567.2</a> | 4.0553       | 0.2425        | 99.8%                 | 2175.41        | 2175.3652       | 1          | 5.659                                            | 55.6%       | : |
|   | <a href="#">SmEgg304.01422.01422.2</a> | 3.2605       | 0.3905        | 99.9%                 | 1617.81        | 1617.7184       | 2          | 6.866                                            | 53.6%       | : |
|   | <a href="#">SmEgg102.02850.02850.2</a> | 2.7907       | 0.2083        | 99.7%                 | 1072.27        | 1072.2468       | 2          | 4.907                                            | 81.2%       | : |
|   | <a href="#">SmEgg106.02769.02769.2</a> | 3.9372       | 0.4482        | 100.0%                | 1757.71        | 1758.0703       | 1          | 7.389                                            | 63.3%       | : |
|   | <a href="#">SmEgg202.02197.02197.1</a> | 2.3168       | 0.2808        | 100.0%                | 1016.51        | 1016.1827       | 270        | 4.699                                            | 55.6%       | : |
|   | <a href="#">SmEgg106.02730.02730.2</a> | 3.2621       | 0.2086        | 99.7%                 | 1757.24        | 1755.98         | 1          | 5.004                                            | 57.7%       | : |
|   | <a href="#">SmEgg103.03346.03346.1</a> | 2.349        | 0.3147        | 100.0%                | 1598.56        | 1599.7925       | 14         | 4.985                                            | 41.7%       | : |
|   | <a href="#">SmEgg103.03347.03347.2</a> | 3.7736       | 0.274         | 99.9%                 | 1600.61        | 1599.7925       | 1          | 5.748                                            | 70.8%       | : |
|   | <a href="#">SmEgg203.02682.02682.2</a> | 3.0907       | 0.232         | 99.6%                 | 1827.78        | 1826.1027       | 2          | 4.55                                             | 52.9%       | : |
|   | <a href="#">SmEgg203.02499.02499.2</a> | 3.4142       | 0.1226        | 98.5%                 | 1669.64        | 1669.9182       | 68         | 3.903                                            | 43.3%       | : |
|   | <a href="#">SmEgg103.03447.03447.2</a> | 5.0066       | 0.3502        | 100.0%                | 1865.45        | 1866.1084       | 1          | 7.43                                             | 71.9%       | : |
|   | <a href="#">SmEgg306.02286.02286.2</a> | 2.4964       | 0.1534        | 95.6%                 | 1247.35        | 1246.4698       | 23         | 4.157                                            | 66.7%       | : |

|   |                                        |              |               |                       |                |                 |            |                |             |   |
|---|----------------------------------------|--------------|---------------|-----------------------|----------------|-----------------|------------|----------------|-------------|---|
| U | <b>TC32345 2 33-145</b>                | 8            | 21            | <a href="#">33.6%</a> | 113            | 13083           | 6.8        | no description |             |   |
|   | <b>Filename</b>                        | <b>XCorr</b> | <b>DeltCN</b> | <b>Conf%</b>          | <b>ObsM+H+</b> | <b>CalcM+H+</b> | <b>SpR</b> | <b>ZScore</b>  | <b>Ion%</b> | : |
| * | <a href="#">SmEgg302.03130.03130.2</a> | 3.684        | 0.2997        | 99.9%                 | 2605.67        | 2605.7747       | 1          | 5.916          | 39.1%       | : |
| * | <a href="#">SmEgg302.03259.03259.2</a> | 2.8013       | 0.2054        | 97.6%                 | 2703.91        | 2704.9072       | 1          | 4.648          | 35.4%       | : |
| * | <a href="#">SmEgg303.02936.02936.2</a> | 3.337        | 0.3292        | 99.8%                 | 3018.12        | 3019.2517       | 2          | 6.692          | 29.6%       | : |
| * | <a href="#">SmEgg305.03279.03279.3</a> | 5.0116       | 0.3664        | 100.0%                | 3569.29        | 3570.895        | 1          | 6.312          | 29.7%       | : |
| * | <a href="#">SmEgg202.03124.03124.2</a> | 3.5906       | 0.3028        | 99.8%                 | 2460.74        | 2460.7031       | 1          | 5.858          | 50.0%       | : |
| * | <a href="#">SmEgg202.03369.03369.2</a> | 5.4563       | 0.4526        | 100.0%                | 1974.62        | 1974.1779       | 1          | 8.411          | 78.1%       | ! |
| * | <a href="#">SmEgg202.03249.03249.2</a> | 2.5806       | 0.2509        | 97.6%                 | 1762.41        | 1762.9573       | 1          | 5.06           | 53.6%       | : |
| * | <a href="#">SmEgg204.02655.02655.2</a> | 3.4268       | 0.1501        | 99.7%                 | 1339.33        | 1339.5375       | 1          | 4.682          | 77.3%       | : |

|   |                                        |              |               |                       |                |                 |            |                                                                                                                     |             |   |
|---|----------------------------------------|--------------|---------------|-----------------------|----------------|-----------------|------------|---------------------------------------------------------------------------------------------------------------------|-------------|---|
| U | <b>TC22471 3 2-180</b>                 | 5            | 11            | <a href="#">33.5%</a> | 179            | 18911           | 7.7        | GB AAC14467.1 160955 SCMDISMU03<br>Cu/Zn-superoxide dismutase {Schistosoma mansoni} (exp=-1; wgp=0; cg=0), complete |             |   |
|   | <b>Filename</b>                        | <b>XCorr</b> | <b>DeltCN</b> | <b>Conf%</b>          | <b>ObsM+H+</b> | <b>CalcM+H+</b> | <b>SpR</b> | <b>ZScore</b>                                                                                                       | <b>Ion%</b> | : |
|   | <a href="#">SmEgg206.02312.02312.2</a> | 4.3283       | 0.4127        | 100.0%                | 2213.38        | 2214.399        | 1          | 8.106                                                                                                               | 47.4%       | : |
|   | <a href="#">SmEgg303.01452.01452.2</a> | 3.1398       | 0.1242        | 98.5%                 | 1334.11        | 1334.388        | 1          | 4.734                                                                                                               | 77.3%       | : |
|   | <a href="#">SmEgg204.02434.02434.2</a> | 6.7475       | 0.5546        | 100.0%                | 2256.9         | 2258.4092       | 1          | 10.199                                                                                                              | 65.9%       | : |
| * | <a href="#">SmEgg403.02094.02094.2</a> | 3.0817       | 0.1793        | 98.5%                 | 1791.24        | 1790.887        | 2          | 5.118                                                                                                               | 56.7%       | : |
| * | <a href="#">SmEgg403.02042.02042.2</a> | 2.6345       | 0.2222        | 97.0%                 | 1876.39        | 1877.9652       | 1          | 4.457                                                                                                               | 50.0%       | : |

|   |                         |    |    |                       |     |       |     |                                     |  |  |
|---|-------------------------|----|----|-----------------------|-----|-------|-----|-------------------------------------|--|--|
| U | <b>TC20152 3 12-491</b> | 13 | 25 | <a href="#">33.3%</a> | 480 | 53947 | 5.0 | similar to UP Q5C0B0_SCHJA (Q5C0B0) |  |  |
|---|-------------------------|----|----|-----------------------|-----|-------|-----|-------------------------------------|--|--|

## SJCHGC09060 protein (Fragment), complete

|   | Filename                               | XCorr  | DeltCN | Conf%  | ObsM+H+ | CalcM+H+  | SpR | ZScore | Ion%  |  |
|---|----------------------------------------|--------|--------|--------|---------|-----------|-----|--------|-------|--|
| * | <a href="#">SmEgg204.02458.02458.2</a> | 3.6016 | 0.2064 | 99.8%  | 1713.72 | 1712.8619 | 1   | 4.679  | 65.4% |  |
| * | <a href="#">SmEgg202.02863.02863.1</a> | 2.5049 | 0.2655 | 100.0% | 1368.59 | 1369.4247 | 1   | 6.082  | 68.2% |  |
| * | <a href="#">SmEgg102.02351.02351.2</a> | 3.7586 | 0.1978 | 99.8%  | 2101.76 | 2100.2493 | 1   | 5.991  | 52.9% |  |
| * | <a href="#">SmEgg105.03213.03213.2</a> | 5.0889 | 0.3155 | 100.0% | 1974.8  | 1975.2517 | 1   | 6.481  | 78.1% |  |
| * | <a href="#">SmEgg203.02311.02311.1</a> | 2.3315 | 0.2679 | 100.0% | 1203.55 | 1204.4117 | 1   | 5.807  | 59.1% |  |
| * | <a href="#">SmEgg102.01155.01155.1</a> | 2.1357 | 0.2465 | 99.3%  | 1116.44 | 1117.1577 | 35  | 5.197  | 55.6% |  |
| * | <a href="#">SmEgg304.03640.03640.2</a> | 2.8497 | 0.2704 | 99.5%  | 2061.19 | 2062.244  | 1   | 5.547  | 44.1% |  |
| * | <a href="#">SmEgg102.02622.02622.2</a> | 3.2147 | 0.3296 | 99.8%  | 2224.52 | 2224.4065 | 1   | 6.687  | 52.8% |  |
| * | <a href="#">SmEgg204.02640.02640.2</a> | 3.9341 | 0.2293 | 99.8%  | 2076.2  | 2077.4004 | 1   | 5.029  | 52.8% |  |
|   | <a href="#">SmEgg402.04602.04602.1</a> | 1.9774 | 0.2264 | 96.7%  | 1447.4  | 1448.6152 | 1   | 4.926  | 45.8% |  |
|   | <a href="#">SmEgg102.03685.03685.1</a> | 2.9134 | 0.1666 | 99.3%  | 1575.66 | 1576.7893 | 4   | 4.765  | 53.8% |  |
|   | <a href="#">SmEgg202.03797.03797.2</a> | 3.3723 | 0.2942 | 99.8%  | 1577.76 | 1576.7893 | 1   | 5.997  | 76.9% |  |
|   | <a href="#">SmEgg303.02811.02811.2</a> | 3.5431 | 0.2996 | 99.8%  | 1946.98 | 1946.0343 | 1   | 5.776  | 56.2% |  |

U **CD161554|6|1-72** 2 2 **33.3%** 72 8673 9.0 no description

|   | Filename                               | XCorr  | DeltCN | Conf% | ObsM+H+ | CalcM+H+  | SpR | ZScore | Ion%  | # |
|---|----------------------------------------|--------|--------|-------|---------|-----------|-----|--------|-------|---|
| * | <a href="#">SmEgg205.02457.02457.2</a> | 2.5675 | 0.1097 | 96.6% | 1004.06 | 1004.1765 | 3   | 4.872  | 85.7% | 1 |
| * | <a href="#">SmEgg305.02423.02423.2</a> | 3.3454 | 0.1999 | 99.7% | 1922.59 | 1924.0372 | 1   | 5.359  | 60.0% | 1 |

U **TC24765|2|12-189** 5 5 **33.1%** 178 19839 9.4 no description

|   | Filename                               | XCorr  | DeltCN | Conf% | ObsM+H+ | CalcM+H+  | SpR | ZScore | Ion%  | # |
|---|----------------------------------------|--------|--------|-------|---------|-----------|-----|--------|-------|---|
| * | <a href="#">SmEgg203.03076.03076.2</a> | 3.8199 | 0.2489 | 99.8% | 1669.36 | 1669.9158 | 4   | 5.672  | 56.2% | 1 |
| * | <a href="#">SmEgg305.02619.02619.2</a> | 2.6007 | 0.3655 | 99.8% | 1696.4  | 1696.9847 | 1   | 6.381  | 46.9% | 1 |
| * | <a href="#">SmEgg202.03191.03191.2</a> | 3.6514 | 0.1638 | 99.8% | 1415.25 | 1414.5981 | 1   | 5.032  | 77.3% | 1 |
| * | <a href="#">SmEgg203.04792.04792.3</a> | 3.3508 | 0.2807 | 95.0% | 3062.17 | 3064.2983 | 1   | 5.462  | 26.8% | 1 |
| * | <a href="#">SmEgg203.04796.04796.2</a> | 3.4584 | 0.2617 | 99.8% | 3063.68 | 3064.2983 | 1   | 6.709  | 30.4% | 1 |

U **TC28662|1|6-84** 5 9 **32.9%** 79 8957 7.9 no description

|   | Filename                               | XCorr  | DeltCN | Conf% | ObsM+H+ | CalcM+H+  | SpR | ZScore | Ion%  | # |
|---|----------------------------------------|--------|--------|-------|---------|-----------|-----|--------|-------|---|
| * | <a href="#">SmEgg202.01367.01367.2</a> | 2.8592 | 0.163  | 99.5% | 1126.13 | 1126.15   | 1   | 4.182  | 87.5% | 2 |
| * | <a href="#">SmEgg102.01259.01259.1</a> | 2.3371 | 0.2169 | 99.1% | 1012.42 | 1012.9906 | 23  | 4.725  | 71.4% | 2 |
| * | <a href="#">SmEgg405.02142.02142.2</a> | 3.2157 | 0.2364 | 99.7% | 1561.39 | 1561.7107 | 1   | 6.126  | 70.8% | 1 |
| * | <a href="#">SmEgg305.01883.01883.2</a> | 3.5312 | 0.1401 | 99.2% | 1736.65 | 1735.8671 | 90  | 4.212  | 46.4% | 2 |
| * | <a href="#">SmEgg202.02338.02338.2</a> | 3.5298 | 0.2626 | 99.9% | 1246.01 | 1246.2756 | 1   | 6.09   | 90.0% | 2 |

U **TC31901|1|1-177** 7 11 **32.8%** 177 20277 6.3 similar to UP|Q5DBS4\_SCHJA (Q5DBS4)  
SJCHGC05684 protein, partial (42%)

|   | Filename                               | XCorr  | DeltCN | Conf%  | ObsM+H+ | CalcM+H+  | SpR | ZScore | Ion%  |  |
|---|----------------------------------------|--------|--------|--------|---------|-----------|-----|--------|-------|--|
|   | <a href="#">SmEgg102.02443.02443.2</a> | 3.3414 | 0.1876 | 99.8%  | 1135.99 | 1136.2932 | 2   | 4.724  | 88.9% |  |
| * | <a href="#">SmEgg204.02048.02048.2</a> | 3.1051 | 0.0417 | 97.7%  | 1081.41 | 1081.2168 | 2   | 4.119  | 87.5% |  |
| * | <a href="#">SmEgg104.01724.01724.2</a> | 3.2658 | 0.087  | 99.6%  | 987.14  | 987.1032  | 26  | 3.719  | 75.0% |  |
| * | <a href="#">SmEgg202.03209.03209.2</a> | 4.8851 | 0.3608 | 100.0% | 1755.57 | 1755.8785 | 1   | 6.776  | 63.3% |  |
| * | <a href="#">SmEgg303.03453.03453.2</a> | 3.1571 | 0.2531 | 99.7%  | 1442.54 | 1442.5652 | 1   | 5.169  | 62.5% |  |
| * | <a href="#">SmEgg202.03575.03575.1</a> | 2.5353 | 0.1818 | 97.9%  | 1269.45 | 1270.4247 | 2   | 5.137  | 65.0% |  |
| * | <a href="#">SmEgg202.03579.03579.2</a> | 3.554  | 0.2364 | 99.8%  | 1270.44 | 1270.4247 | 3   | 4.571  | 80.0% |  |

Similarities: [TC25740|2|17-427](#)(1:6)

U **TC20497|3|1-257** 6 23 **32.3%** 257 29237 6.7 homologue to UP|Q8WT66\_SCHJA (Q8WT66)  
Phosphoglycerate mutase, complete

|   | Filename                               | XCorr  | DeltCN | Conf%  | ObsM+H+ | CalcM+H+  | SpR | ZScore | Ion%  |  |
|---|----------------------------------------|--------|--------|--------|---------|-----------|-----|--------|-------|--|
| * | <a href="#">SmEgg103.02398.02398.2</a> | 4.2533 | 0.2817 | 99.9%  | 1994.14 | 1993.1058 | 1   | 5.337  | 64.7% |  |
| * | <a href="#">SmEgg105.04173.04173.2</a> | 5.3222 | 0.2621 | 100.0% | 2130.98 | 2131.4766 | 1   | 6.41   | 58.8% |  |
| * | <a href="#">SmEgg306.03147.03147.2</a> | 4.8868 | 0.3785 | 100.0% | 1917.65 | 1917.212  | 1   | 6.858  | 73.3% |  |

|   |                                        |        |        |        |         |           |   |       |       |   |
|---|----------------------------------------|--------|--------|--------|---------|-----------|---|-------|-------|---|
| * | <a href="#">SmEgg204.04411.04411.2</a> | 3.0164 | 0.4339 | 99.9%  | 1624.66 | 1624.92   | 1 | 6.722 | 73.1% | 4 |
| * | <a href="#">SmEgg206.03286.03286.2</a> | 3.1449 | 0.0878 | 97.3%  | 1412.32 | 1412.628  | 4 | 4.606 | 59.1% | 1 |
| * | <a href="#">SmEgg103.04437.04437.3</a> | 4.4624 | 0.2954 | 100.0% | 3662.04 | 3663.1133 | 1 | 5.576 | 26.6% | 1 |

|   |                                        |              |               |                       |                |                 |            |                                                                                                                                      |             |          |
|---|----------------------------------------|--------------|---------------|-----------------------|----------------|-----------------|------------|--------------------------------------------------------------------------------------------------------------------------------------|-------------|----------|
| U | <b>TC20398 1 12-244</b>                | 5            | 9             | <a href="#">32.2%</a> | 233            | 25396           | 8.5        | UP PPIB_SCHMA (Q26551) Peptidyl-prolyl cis-trans isomerase B precursor (PPIase) (Rotamase) (Cyclophilin B) (S-cyclophilin), complete |             |          |
|   | <b>Filename</b>                        | <b>XCorr</b> | <b>DeltCN</b> | <b>Conf%</b>          | <b>ObsM+H+</b> | <b>CalcM+H+</b> | <b>SpR</b> | <b>ZScore</b>                                                                                                                        | <b>Ion%</b> | <b>#</b> |
|   | <a href="#">SmEgg306.02154.02154.2</a> | 3.0444       | 0.2192        | 99.5%                 | 1589.2         | 1589.8754       | 1          | 4.578                                                                                                                                | 57.7%       | 1        |
| * | <a href="#">SmEgg304.02082.02082.2</a> | 2.7939       | 0.2308        | 99.3%                 | 1494.53        | 1494.6499       | 1          | 5.471                                                                                                                                | 63.6%       | 1        |
| * | <a href="#">SmEgg205.03605.03605.2</a> | 3.3993       | 0.226         | 99.8%                 | 2808.97        | 2808.1406       | 1          | 4.468                                                                                                                                | 30.8%       | 1        |
|   | <a href="#">SmEgg203.03351.03351.2</a> | 3.3031       | 0.21          | 99.7%                 | 2342.86        | 2343.5615       | 11         | 5.075                                                                                                                                | 35.7%       | 5        |
|   | <a href="#">SmEgg404.03583.03583.1</a> | 2.3335       | 0.204         | 97.9%                 | 1542.59        | 1543.726        | 3          | 5.178                                                                                                                                | 50.0%       | 1        |

|   |                                        |              |               |                       |                |                 |            |                                                                  |             |          |
|---|----------------------------------------|--------------|---------------|-----------------------|----------------|-----------------|------------|------------------------------------------------------------------|-------------|----------|
| U | <b>TC21411 3 20-228</b>                | 5            | 10            | <a href="#">32.1%</a> | 209            | 24311           | 9.7        | UP Q1X6L5_SCHMA (Q1X6L5) Venom allergen-like protein 2, complete |             |          |
|   | <b>Filename</b>                        | <b>XCorr</b> | <b>DeltCN</b> | <b>Conf%</b>          | <b>ObsM+H+</b> | <b>CalcM+H+</b> | <b>SpR</b> | <b>ZScore</b>                                                    | <b>Ion%</b> | <b>#</b> |
| * | <a href="#">SmEgg204.02050.02050.2</a> | 3.1312       | 0.1224        | 98.8%                 | 1369.92        | 1368.5327       | 3          | 4.146                                                            | 70.0%       | 1        |
|   | <a href="#">SmEgg204.01937.01937.2</a> | 3.1375       | 0.2022        | 99.1%                 | 1990.79        | 1990.1895       | 1          | 4.632                                                            | 50.0%       | 1        |
|   | <a href="#">SmEgg306.02122.02122.1</a> | 2.3114       | 0.2318        | 99.1%                 | 1007.49        | 1007.2211       | 1          | 5.421                                                            | 68.8%       | 1        |
|   | <a href="#">SmEgg103.02334.02334.2</a> | 3.0095       | 0.0935        | 97.2%                 | 1290.32        | 1290.3776       | 5          | 3.751                                                            | 70.0%       | 1        |
| * | <a href="#">SmEgg204.02851.02851.2</a> | 3.9199       | 0.3494        | 100.0%                | 2104.73        | 2104.2495       | 1          | 6.262                                                            | 52.8%       | 1        |

|   |                                        |              |               |                       |                |                 |            |                |             |          |
|---|----------------------------------------|--------------|---------------|-----------------------|----------------|-----------------|------------|----------------|-------------|----------|
| U | <b>TC29530 4 1-209</b>                 | 5            | 14            | <a href="#">32.1%</a> | 209            | 24135           | 6.0        | no description |             |          |
|   | <b>Filename</b>                        | <b>XCorr</b> | <b>DeltCN</b> | <b>Conf%</b>          | <b>ObsM+H+</b> | <b>CalcM+H+</b> | <b>SpR</b> | <b>ZScore</b>  | <b>Ion%</b> | <b>#</b> |
| * | <a href="#">SmEgg105.02337.02337.2</a> | 3.3906       | 0.262         | 99.8%                 | 1394.47        | 1394.5946       | 1          | 5.997          | 77.3%       | 1        |
|   | <a href="#">SmEgg104.01919.01919.1</a> | 2.8431       | 0.3078        | 100.0%                | 1321.51        | 1322.4265       | 1          | 5.452          | 65.0%       | 1        |
|   | <a href="#">SmEgg104.01922.01922.2</a> | 3.7164       | 0.338         | 100.0%                | 1323.08        | 1322.4265       | 1          | 6.221          | 80.0%       | 1        |
| * | <a href="#">SmEgg103.02879.02879.2</a> | 4.2168       | 0.3618        | 100.0%                | 2581.71        | 2582.767        | 1          | 7.302          | 45.2%       | 1        |
| * | <a href="#">SmEgg203.02892.02892.2</a> | 4.019        | 0.3985        | 100.0%                | 2544.31        | 2545.7493       | 1          | 7.798          | 47.6%       | 1        |

|   |                                        |              |               |                       |                |                 |            |                                                                |             |          |
|---|----------------------------------------|--------------|---------------|-----------------------|----------------|-----------------|------------|----------------------------------------------------------------|-------------|----------|
| U | <b>TC26362 2 1-129</b>                 | 3            | 4             | <a href="#">31.8%</a> | 129            | 14686           | 7.9        | UP Q7YW72_SCHMA (Q7YW72) Cysteine protease inhibitor, complete |             |          |
|   | <b>Filename</b>                        | <b>XCorr</b> | <b>DeltCN</b> | <b>Conf%</b>          | <b>ObsM+H+</b> | <b>CalcM+H+</b> | <b>SpR</b> | <b>ZScore</b>                                                  | <b>Ion%</b> | <b>#</b> |
| * | <a href="#">SmEgg206.03026.03026.2</a> | 3.2846       | 0.241         | 99.8%                 | 2206.97        | 2205.5186       | 21         | 5.807                                                          | 36.8%       | 2        |
| * | <a href="#">SmEgg105.02159.02159.2</a> | 3.6269       | 0.2738        | 99.9%                 | 1415.46        | 1415.5919       | 1          | 5.392                                                          | 77.3%       | 1        |
| * | <a href="#">SmEgg104.01967.01967.2</a> | 2.5393       | 0.1737        | 97.7%                 | 1052.99        | 1053.2468       | 7          | 3.997                                                          | 68.8%       | 1        |

|   |                                        |              |               |                       |                |                 |            |                                                                               |             |          |
|---|----------------------------------------|--------------|---------------|-----------------------|----------------|-----------------|------------|-------------------------------------------------------------------------------|-------------|----------|
| U | <b>TC25740 2 17-427</b>                | 10           | 19            | <a href="#">31.6%</a> | 411            | 46624           | 7.1        | weakly similar to UP Q5DBS4_SCHJA (Q5DBS4) SJCHGC05684 protein, partial (93%) |             |          |
|   | <b>Filename</b>                        | <b>XCorr</b> | <b>DeltCN</b> | <b>Conf%</b>          | <b>ObsM+H+</b> | <b>CalcM+H+</b> | <b>SpR</b> | <b>ZScore</b>                                                                 | <b>Ion%</b> | <b>#</b> |
| * | <a href="#">SmEgg306.02448.02448.2</a> | 3.003        | 0.2036        | 99.3%                 | 1427.0         | 1428.6488       | 1          | 4.49                                                                          | 66.7%       | 1        |
| * | <a href="#">SmEgg305.03136.03136.2</a> | 3.0867       | 0.2881        | 99.7%                 | 1829.78        | 1830.0709       | 1          | 5.862                                                                         | 53.3%       | 1        |
| * | <a href="#">SmEgg102.03174.03174.2</a> | 3.1663       | 0.1024        | 98.6%                 | 1396.46        | 1396.5922       | 18         | 3.26                                                                          | 75.0%       | 1        |
| * | <a href="#">SmEgg104.02059.02059.1</a> | 2.5371       | 0.1926        | 99.3%                 | 1077.46        | 1078.2102       | 51         | 4.321                                                                         | 62.5%       | 1        |
| * | <a href="#">SmEgg202.02525.02525.1</a> | 2.8972       | 0.2461        | 100.0%                | 1252.53        | 1253.3971       | 1          | 5.72                                                                          | 65.0%       | 1        |
| * | <a href="#">SmEgg205.03958.03958.2</a> | 4.8175       | 0.3065        | 100.0%                | 2166.68        | 2167.4265       | 1          | 7.494                                                                         | 55.3%       | 1        |
| * | <a href="#">SmEgg105.02903.02903.2</a> | 4.2704       | 0.3219        | 100.0%                | 2648.91        | 2649.8975       | 1          | 6.214                                                                         | 43.8%       | 1        |
|   | <a href="#">SmEgg102.02443.02443.2</a> | 3.3414       | 0.1876        | 99.8%                 | 1135.99        | 1136.2932       | 2          | 4.724                                                                         | 88.9%       | 1        |
| * | <a href="#">SmEgg102.03189.03189.2</a> | 4.6068       | 0.3626        | 100.0%                | 1767.34        | 1767.9329       | 1          | 6.903                                                                         | 70.0%       | 1        |
| * | <a href="#">SmEgg304.03131.03131.2</a> | 3.7661       | 0.2092        | 99.8%                 | 1495.56        | 1495.675        | 3          | 4.669                                                                         | 72.7%       | 1        |

Similarities: [TC31901|1|1-177](#)(1:9)

|   |                        |   |   |                       |     |       |     |                                                                    |  |  |
|---|------------------------|---|---|-----------------------|-----|-------|-----|--------------------------------------------------------------------|--|--|
| U | <b>TC33243 2 8-144</b> | 3 | 5 | <a href="#">31.4%</a> | 137 | 16353 | 7.4 | similar to UP Q6GM02_XENLA (Q6GM02) MGC84082 protein, partial (5%) |  |  |
|---|------------------------|---|---|-----------------------|-----|-------|-----|--------------------------------------------------------------------|--|--|

|   | Filename                               | XCorr  | DeltCN | Conf%  | ObsM+H+ | CalcM+H+  | SpR | ZScore | Ion%  | # |
|---|----------------------------------------|--------|--------|--------|---------|-----------|-----|--------|-------|---|
| * | <a href="#">SmEgg205.02237.02237.2</a> | 4.2585 | 0.3803 | 100.0% | 1650.32 | 1650.7881 | 1   | 6.845  | 80.8% | 1 |
| * | <a href="#">SmEgg205.02466.02466.2</a> | 3.1016 | 0.2925 | 99.8%  | 1246.66 | 1246.4918 | 1   | 4.886  | 83.3% | 1 |
| * | <a href="#">SmEgg302.02958.02958.2</a> | 3.2485 | 0.3886 | 99.9%  | 2236.52 | 2237.45   | 1   | 6.674  | 44.4% | 1 |

|   |                          |   |    |                       |     |       |      |                                                                                                                                |  |  |
|---|--------------------------|---|----|-----------------------|-----|-------|------|--------------------------------------------------------------------------------------------------------------------------------|--|--|
| U | <b>TC31134 3 2-119</b>   | 6 | 40 | <a href="#">31.4%</a> | 118 | 12836 | 10.0 | homologue to RF NP_957367.1 41055102 NM_201073 H2A histone family, member X {Danio rerio} (exp=-1; wgp=0; cg=0), partial (82%) |  |  |
| U | <b>TC32673 5 62-150</b>  | 6 | 40 | <a href="#">41.6%</a> | 89  | 9601  | 9.7  | homologue to GB CAI12570.1 55960993 AL591493 histone 2, H2ab {Homo sapiens} (exp=0; wgp=1; cg=0), partial (72%)                |  |  |
| U | <b>TC31697 2 111-133</b> | 6 | 40 | <a href="#">30.1%</a> | 123 | 13355 | 10.5 | homologue to UP Q90ZD8_BUFBG (Q90ZD8) Replication-dependent histone H2A, partial (96%)                                         |  |  |

|  | Filename                               | XCorr  | DeltCN | Conf%  | ObsM+H+ | CalcM+H+  | SpR | ZScore | Ion%  | # |
|--|----------------------------------------|--------|--------|--------|---------|-----------|-----|--------|-------|---|
|  | <a href="#">SmEgg206.02219.02219.2</a> | 2.8286 | 0.0254 | 97.4%  | 850.67  | 851.0396  | 3   | 2.813  | 91.7% | 1 |
|  | <a href="#">SmEgg206.02300.02300.2</a> | 2.9272 | 0.2654 | 99.7%  | 1693.65 | 1693.9004 | 1   | 5.097  | 61.5% | 1 |
|  | <a href="#">SmEgg202.03868.03868.2</a> | 3.65   | 0.271  | 99.8%  | 1820.78 | 1821.1704 | 3   | 6.218  | 58.3% | 2 |
|  | <a href="#">SmEgg202.00082.00082.1</a> | 3.3339 | 0.2528 | 100.0% | 1480.67 | 1480.7477 | 3   | 5.776  | 53.6% | 2 |
|  | <a href="#">SmEgg102.00051.00051.2</a> | 3.3173 | 0.2355 | 99.8%  | 1481.54 | 1480.7477 | 1   | 4.822  | 60.7% | 3 |
|  | <a href="#">SmEgg205.03745.03745.2</a> | 4.1795 | 0.2619 | 99.9%  | 1932.78 | 1932.3573 | 1   | 5.202  | 52.8% | 4 |

Similarities: [TC22224|2|12-143](#)(1:5)

| U | <b>TC22539 2 57-333</b>                | 5      | 16     | <a href="#">31.0%</a> | 277     | 31839     | 5.3 | UP Q9U491_SCHMA (Q9U491) 14-3-3 epsilon, complete |       |   |
|---|----------------------------------------|--------|--------|-----------------------|---------|-----------|-----|---------------------------------------------------|-------|---|
|   | Filename                               | XCorr  | DeltCN | Conf%                 | ObsM+H+ | CalcM+H+  | SpR | ZScore                                            | Ion%  | # |
|   | <a href="#">SmEgg203.01908.01908.2</a> | 3.7861 | 0.2125 | 99.8%                 | 1836.68 | 1836.956  | 1   | 5.296                                             | 59.4% | 1 |
|   | <a href="#">SmEgg205.03026.03026.2</a> | 4.8205 | 0.4509 | 100.0%                | 2244.04 | 2244.512  | 1   | 7.505                                             | 60.5% | 1 |
|   | <a href="#">SmEgg203.04008.04008.2</a> | 4.9035 | 0.3219 | 100.0%                | 2427.86 | 2427.6702 | 1   | 6.953                                             | 45.2% | 1 |
| 2 | <a href="#">SmEgg103.03729.03729.2</a> | 3.9306 | 0.0448 | 99.8%                 | 1190.3  | 1190.4436 | 1   | 3.656                                             | 88.9% | 1 |
|   | <a href="#">SmEgg202.02517.02517.2</a> | 3.6365 | 0.2321 | 99.8%                 | 2018.72 | 2019.1321 | 2   | 5.159                                             | 46.9% | 1 |

Similarities: [TC19827|3|12-261](#)(1:4)[TC30162|3|15-252](#)(1:4)[TC19970|3|1529-1794](#)(1:4)

| U | <b>TC20787 1 25-200</b>                | 4      | 8      | <a href="#">30.7%</a> | 176     | 20190     | 5.3 | homologue to UP FRIH2_SCHMA (P25320) Ferritin-2 heavy chain , complete |       |   |
|---|----------------------------------------|--------|--------|-----------------------|---------|-----------|-----|------------------------------------------------------------------------|-------|---|
|   | Filename                               | XCorr  | DeltCN | Conf%                 | ObsM+H+ | CalcM+H+  | SpR | ZScore                                                                 | Ion%  | # |
| * | <a href="#">SmEgg202.04068.04068.2</a> | 4.7901 | 0.5095 | 100.0%                | 1974.14 | 1975.1929 | 1   | 9.384                                                                  | 73.5% | 1 |
| * | <a href="#">SmEgg203.02276.02276.1</a> | 2.5628 | 0.2692 | 100.0%                | 1225.58 | 1226.4154 | 3   | 5.677                                                                  | 60.0% | 1 |
| * | <a href="#">SmEgg202.04117.04117.2</a> | 3.4768 | 0.2903 | 99.8%                 | 2649.7  | 2646.8267 | 1   | 6.069                                                                  | 36.4% | 4 |
| * | <a href="#">SmEgg304.04227.04227.2</a> | 3.8567 | 0.4268 | 100.0%                | 2807.22 | 2808.03   | 1   | 7.525                                                                  | 37.0% | 1 |

| U | <b>AI764918 3 1-82</b>                 | 11     | 15     | <a href="#">30.5%</a> | 82      | 9430      | 6.8 | no description |       |   |
|---|----------------------------------------|--------|--------|-----------------------|---------|-----------|-----|----------------|-------|---|
|   | Filename                               | XCorr  | DeltCN | Conf%                 | ObsM+H+ | CalcM+H+  | SpR | ZScore         | Ion%  | # |
|   | <a href="#">SmEgg105.03041.03041.2</a> | 3.8119 | 0.1706 | 99.8%                 | 1231.34 | 1231.5977 | 1   | 4.446          | 80.0% | 4 |
|   | <a href="#">SmEgg105.03051.03051.1</a> | 2.6066 | 0.1671 | 97.5%                 | 1232.69 | 1231.5977 | 1   | 3.92           | 70.0% | 1 |
|   | <a href="#">SmEgg306.02358.02358.2</a> | 3.2411 | 0.1939 | 99.4%                 | 2170.85 | 2171.476  | 1   | 5.064          | 47.4% | 1 |
| * | <a href="#">SmEgg306.02355.02355.2</a> | 2.9784 | 0.1768 | 97.7%                 | 2228.67 | 2228.5278 | 3   | 4.357          | 40.0% | 1 |
|   | <a href="#">SmEgg306.02335.02335.2</a> | 3.4492 | 0.3033 | 99.8%                 | 2099.7  | 2100.3972 | 1   | 5.411          | 47.2% | 1 |
|   | <a href="#">SmEgg306.02266.02266.3</a> | 4.5379 | 0.282  | 100.0%                | 1986.32 | 1987.2378 | 1   | 5.917          | 39.7% | 1 |
|   | <a href="#">SmEgg306.02264.02264.2</a> | 3.5311 | 0.3418 | 99.9%                 | 1988.45 | 1987.2378 | 1   | 6.318          | 47.1% | 1 |
| * | <a href="#">SmEgg306.02258.02258.2</a> | 3.5625 | 0.3119 | 99.8%                 | 2043.68 | 2044.2897 | 1   | 6.699          | 55.6% | 1 |
|   | <a href="#">SmEgg306.02250.02250.2</a> | 3.586  | 0.2602 | 99.8%                 | 1688.63 | 1688.9391 | 2   | 5.767          | 64.3% | 1 |
|   | <a href="#">SmEgg104.02111.02111.2</a> | 2.487  | 0.2876 | 99.1%                 | 1342.37 | 1342.4943 | 7   | 5.598          | 68.2% | 1 |

SmEgg103.02114.02114.2 2.8176 0.173 99.0% 1094.41 1094.2125 1 4.037 88.9% :  
 Similarities: [TC19794|2|19-299\(9:2\)](#)

[U](#) **TC21507|3|27-272** 5 7 [29.3%](#) 246 28163 6.5 UP|Q86LC0\_SCHMA (Q86LC0) Glutathione S-transferase omega, complete

| Filename                                 | XCorr  | DeltCN | Conf% | ObsM+H+ | CalcM+H+  | SpR | ZScore | Ion%  | # |
|------------------------------------------|--------|--------|-------|---------|-----------|-----|--------|-------|---|
| <a href="#">SmEgg202.02169.02169.1</a>   | 1.9895 | 0.2048 | 96.1% | 1041.73 | 1042.2206 | 41  | 4.548  | 62.5% | 1 |
| <a href="#">SmEgg206.03167.03167.3</a>   | 4.2024 | 0.2064 | 99.5% | 3332.15 | 3331.8423 | 2   | 4.832  | 25.9% | 1 |
| <a href="#">SmEgg204.04247.04247.2</a>   | 3.3327 | 0.3341 | 99.8% | 2461.91 | 2461.826  | 1   | 6.048  | 47.4% | 1 |
| * <a href="#">SmEgg306.03224.03224.2</a> | 3.9186 | 0.2842 | 99.9% | 1743.31 | 1743.0123 | 1   | 6.196  | 60.0% | 2 |
| * <a href="#">SmEgg104.02416.02416.2</a> | 3.9114 | 0.1958 | 99.8% | 1985.7  | 1985.1606 | 1   | 5.693  | 50.0% | 2 |

[U](#) **TC35851|2|10-218** 15 47 [29.2%](#) 209 23931 9.4 homologue to  
 RF|NP\_995994.1|45552935|NM\_206272  
 CG11624-PC, isoform C {Drosophila melanogaster} (exp=-1; wgp=0; cg=0), partial (31%)

| Filename                                 | XCorr  | DeltCN | Conf%  | ObsM+H+ | CalcM+H+  | SpR | ZScore | Ion%  | # |
|------------------------------------------|--------|--------|--------|---------|-----------|-----|--------|-------|---|
| <a href="#">SmEgg302.01923.01923.1</a>   | 2.2794 | 0.2157 | 98.7%  | 1430.43 | 1431.5396 | 2   | 4.839  | 62.5% | 1 |
| <a href="#">SmEgg302.01763.01763.2</a>   | 2.9973 | 0.3029 | 99.8%  | 1559.49 | 1559.7136 | 5   | 5.104  | 61.5% | 1 |
| <a href="#">SmEgg302.02188.02188.2</a>   | 2.7954 | 0.3349 | 99.8%  | 1800.02 | 1801.0038 | 1   | 6.028  | 50.0% | 1 |
| 2 <a href="#">SmEgg306.02348.02348.2</a> | 2.847  | 0.2054 | 97.9%  | 2025.89 | 2026.3433 | 3   | 3.931  | 40.6% | 1 |
| <a href="#">SmEgg303.02399.02399.2</a>   | 2.8683 | 0.2225 | 98.6%  | 1897.89 | 1898.1692 | 1   | 4.942  | 50.0% | 1 |
| <a href="#">SmEgg303.02495.02495.2</a>   | 3.0079 | 0.2098 | 99.1%  | 1656.42 | 1656.879  | 1   | 4.297  | 61.5% | 1 |
| <a href="#">SmEgg303.02351.02351.2</a>   | 2.9333 | 0.1755 | 97.5%  | 1727.32 | 1727.9579 | 2   | 4.475  | 57.1% | 1 |
| <a href="#">SmEgg303.02427.02427.1</a>   | 1.9956 | 0.2109 | 96.3%  | 1113.7  | 1114.2896 | 2   | 4.758  | 68.8% | 1 |
| <a href="#">SmEgg306.02211.02211.2</a>   | 2.9785 | 0.1649 | 99.5%  | 1196.52 | 1196.4355 | 1   | 4.784  | 88.9% | 1 |
| <a href="#">SmEgg105.02475.02475.1</a>   | 1.9769 | 0.2071 | 96.0%  | 1067.64 | 1068.2615 | 22  | 4.929  | 62.5% | 1 |
| <a href="#">SmEgg205.02585.02585.2</a>   | 2.8538 | 0.215  | 99.8%  | 1068.14 | 1068.2615 | 3   | 4.819  | 81.2% | 1 |
| <a href="#">SmEgg202.02648.02648.2</a>   | 3.6941 | 0.2934 | 99.8%  | 1788.69 | 1788.9897 | 1   | 5.631  | 70.0% | 1 |
| <a href="#">SmEgg302.02546.02546.2</a>   | 3.6252 | 0.2375 | 99.8%  | 1859.62 | 1860.0685 | 2   | 5.086  | 50.0% | 1 |
| <a href="#">SmEgg304.02319.02319.2</a>   | 3.8689 | 0.188  | 99.8%  | 1987.89 | 1988.2427 | 1   | 5.051  | 55.9% | 1 |
| <a href="#">SmEgg305.02821.02821.2</a>   | 4.1191 | 0.3378 | 100.0% | 2230.34 | 2229.5327 | 1   | 6.256  | 50.0% | 1 |

[U](#) **TC20246|2|2-416** 11 23 [28.7%](#) 415 44663 7.1 UP|PGK\_SCHMA (P41759) Phosphoglycerate kinase, complete

| Filename                                 | XCorr  | DeltCN | Conf%  | ObsM+H+ | CalcM+H+  | SpR | ZScore | Ion%  | # |
|------------------------------------------|--------|--------|--------|---------|-----------|-----|--------|-------|---|
| * <a href="#">SmEgg204.02229.02229.1</a> | 2.3963 | 0.2203 | 99.1%  | 897.69  | 898.1338  | 1   | 4.947  | 81.2% | 1 |
| * <a href="#">SmEgg203.04315.04315.3</a> | 4.9852 | 0.3383 | 100.0% | 3489.85 | 3489.839  | 1   | 6.346  | 25.8% | 1 |
| <a href="#">SmEgg103.02394.02394.2</a>   | 3.7118 | 0.357  | 99.9%  | 1635.63 | 1635.7764 | 1   | 6.311  | 60.7% | 1 |
| * <a href="#">SmEgg206.02115.02115.1</a> | 3.2451 | 0.4616 | 100.0% | 1426.58 | 1427.6276 | 1   | 7.436  | 66.7% | 1 |
| * <a href="#">SmEgg106.02160.02160.2</a> | 3.7728 | 0.4074 | 100.0% | 1427.47 | 1427.6276 | 1   | 6.527  | 79.2% | 1 |
| * <a href="#">SmEgg305.03419.03419.2</a> | 2.7918 | 0.1716 | 97.2%  | 1482.85 | 1483.7507 | 2   | 4.078  | 66.7% | 1 |
| * <a href="#">SmEgg206.02878.02878.2</a> | 5.0341 | 0.2468 | 100.0% | 1796.77 | 1797.1075 | 1   | 6.03   | 62.5% | 1 |
| * <a href="#">SmEgg306.02806.02806.1</a> | 2.6271 | 0.3172 | 100.0% | 1395.68 | 1396.6293 | 1   | 6.806  | 58.3% | 1 |
| * <a href="#">SmEgg306.02807.02807.2</a> | 2.6501 | 0.291  | 99.5%  | 1396.5  | 1396.6293 | 1   | 5.855  | 62.5% | 1 |
| * <a href="#">SmEgg204.03181.03181.2</a> | 3.992  | 0.3276 | 99.9%  | 1638.8  | 1639.8918 | 1   | 6.546  | 71.4% | 1 |
| <a href="#">SmEgg204.02453.02453.2</a>   | 4.4588 | 0.4163 | 100.0% | 1741.73 | 1741.939  | 1   | 7.824  | 67.6% | 1 |

[U](#) **TC26644|2|14-181** 4 10 [28.6%](#) 168 19420 7.4 UP|Q1WIQ3\_SCHMA (Q1WIQ3) Venom allergen-like protein 9, complete

| Filename                                 | XCorr  | DeltCN | Conf%  | ObsM+H+ | CalcM+H+  | SpR | ZScore | Ion%  | # |
|------------------------------------------|--------|--------|--------|---------|-----------|-----|--------|-------|---|
| * <a href="#">SmEgg104.02170.02170.2</a> | 2.5088 | 0.189  | 96.6%  | 1340.52 | 1340.5835 | 1   | 4.119  | 70.0% | 1 |
| * <a href="#">SmEgg106.02706.02706.2</a> | 3.5319 | 0.2921 | 99.8%  | 2381.61 | 2381.653  | 1   | 5.855  | 42.1% | 1 |
| * <a href="#">SmEgg203.03342.03342.2</a> | 4.1168 | 0.2462 | 99.9%  | 2224.83 | 2225.4656 | 1   | 5.521  | 50.0% | 1 |
| * <a href="#">SmEgg204.02461.02461.2</a> | 4.0804 | 0.3517 | 100.0% | 1888.37 | 1887.1119 | 1   | 7.112  | 71.9% | 1 |

|                                                     |                                        |              |               |                       |                |                 |            |                                                                                                                                           |             |          |  |  |  |  |  |  |  |  |  |
|-----------------------------------------------------|----------------------------------------|--------------|---------------|-----------------------|----------------|-----------------|------------|-------------------------------------------------------------------------------------------------------------------------------------------|-------------|----------|--|--|--|--|--|--|--|--|--|
| <a href="#">U</a>                                   | <b>TC19814 1 14-174</b>                | 2            | 9             | <a href="#">28.6%</a> | 161            | 18166           | 8.0        | similar to UP Q5DFJ0_SCHJA (Q5DFJ0)<br>SJCHGC06706 protein, partial (50%)                                                                 |             |          |  |  |  |  |  |  |  |  |  |
|                                                     | <b>Filename</b>                        | <b>XCorr</b> | <b>DeltCN</b> | <b>Conf%</b>          | <b>ObsM+H+</b> | <b>CalcM+H+</b> | <b>SpR</b> | <b>ZScore</b>                                                                                                                             | <b>Ion%</b> | <b>#</b> |  |  |  |  |  |  |  |  |  |
| *                                                   | <a href="#">SmEgg106.03357.03357.2</a> | 5.1541       | 0.4329        | 100.0%                | 2636.05        | 2636.8774       | 1          | 8.667                                                                                                                                     | 52.3%       | 4        |  |  |  |  |  |  |  |  |  |
| *                                                   | <a href="#">SmEgg203.04638.04638.2</a> | 4.5842       | 0.2881        | 100.0%                | 2477.44        | 2477.8445       | 1          | 5.735                                                                                                                                     | 45.5%       | 1        |  |  |  |  |  |  |  |  |  |
| <a href="#">U</a>                                   | <b>AI820476 4 115-174</b>              | 2            | 2             | <a href="#">28.3%</a> | 60             | 6853            | 7.8        | similar to GP 28894857 gb AAK26170.1<br>interleukin-4-inducing protein precursor<br>{Schistosoma mansoni}, partial (80%)                  |             |          |  |  |  |  |  |  |  |  |  |
|                                                     | <b>Filename</b>                        | <b>XCorr</b> | <b>DeltCN</b> | <b>Conf%</b>          | <b>ObsM+H+</b> | <b>CalcM+H+</b> | <b>SpR</b> | <b>ZScore</b>                                                                                                                             | <b>Ion%</b> | <b>#</b> |  |  |  |  |  |  |  |  |  |
|                                                     | <a href="#">SmEgg405.01579.01579.2</a> | 2.6802       | 0.1875        | 98.0%                 | 1334.2         | 1334.4814       | 19         | 4.066                                                                                                                                     | 70.0%       | 1        |  |  |  |  |  |  |  |  |  |
| *                                                   | <a href="#">SmEgg103.01162.01162.2</a> | 3.0695       | 0.0906        | 97.6%                 | 1291.46        | 1289.3508       | 62         | 3.413                                                                                                                                     | 65.0%       | 1        |  |  |  |  |  |  |  |  |  |
| Similarities: <a href="#">TC24966 183-222</a> (1:1) |                                        |              |               |                       |                |                 |            |                                                                                                                                           |             |          |  |  |  |  |  |  |  |  |  |
| <a href="#">U</a>                                   | <b>AI740368 2 9-79</b>                 | 3            | 3             | <a href="#">28.2%</a> | 71             | 8258            | 7.6        | weakly similar to GP 22094807 gb AAM91993.1 egg<br>secreted protein ESP15 {Schistosoma mansoni},<br>partial (30%)                         |             |          |  |  |  |  |  |  |  |  |  |
|                                                     | <b>Filename</b>                        | <b>XCorr</b> | <b>DeltCN</b> | <b>Conf%</b>          | <b>ObsM+H+</b> | <b>CalcM+H+</b> | <b>SpR</b> | <b>ZScore</b>                                                                                                                             | <b>Ion%</b> | <b>#</b> |  |  |  |  |  |  |  |  |  |
| *                                                   | <a href="#">SmEgg104.01908.01908.1</a> | 2.1415       | 0.1887        | 95.4%                 | 1374.38        | 1375.4219       | 12         | 4.182                                                                                                                                     | 55.0%       | 1        |  |  |  |  |  |  |  |  |  |
| *                                                   | <a href="#">SmEgg204.02088.02088.2</a> | 3.6748       | 0.1688        | 99.8%                 | 2301.69        | 2301.4158       | 2          | 5.25                                                                                                                                      | 44.7%       | 1        |  |  |  |  |  |  |  |  |  |
| *                                                   | <a href="#">SmEgg303.01771.01771.2</a> | 2.5963       | 0.2084        | 95.9%                 | 1719.43        | 1719.8578       | 7          | 4.418                                                                                                                                     | 53.3%       | 1        |  |  |  |  |  |  |  |  |  |
| <a href="#">U</a>                                   | <b>TC27601 3 17-112</b>                | 2            | 5             | <a href="#">28.1%</a> | 96             | 11482           | 8.7        | no description                                                                                                                            |             |          |  |  |  |  |  |  |  |  |  |
|                                                     | <b>Filename</b>                        | <b>XCorr</b> | <b>DeltCN</b> | <b>Conf%</b>          | <b>ObsM+H+</b> | <b>CalcM+H+</b> | <b>SpR</b> | <b>ZScore</b>                                                                                                                             | <b>Ion%</b> | <b>#</b> |  |  |  |  |  |  |  |  |  |
| *                                                   | <a href="#">SmEgg202.02512.02512.2</a> | 4.6552       | 0.4549        | 100.0%                | 2041.65        | 2042.0834       | 1          | 7.31                                                                                                                                      | 65.6%       | 1        |  |  |  |  |  |  |  |  |  |
| *                                                   | <a href="#">SmEgg203.02904.02904.2</a> | 3.3926       | 0.2481        | 99.8%                 | 1218.03        | 1218.3544       | 1          | 4.694                                                                                                                                     | 94.4%       | 1        |  |  |  |  |  |  |  |  |  |
| <a href="#">U</a>                                   | <b>TC21143 3 17-184</b>                | 3            | 4             | <a href="#">28.0%</a> | 168            | 19256           | 4.8        | UP TCTP_SCHMA (Q95WA2)<br>Translationally-controlled tumor protein<br>homolog (TCTP) (Histamine-releasing factor)<br>(Fragment), complete |             |          |  |  |  |  |  |  |  |  |  |
|                                                     | <b>Filename</b>                        | <b>XCorr</b> | <b>DeltCN</b> | <b>Conf%</b>          | <b>ObsM+H+</b> | <b>CalcM+H+</b> | <b>SpR</b> | <b>ZScore</b>                                                                                                                             | <b>Ion%</b> | <b>#</b> |  |  |  |  |  |  |  |  |  |
|                                                     | <a href="#">SmEgg202.02518.02518.2</a> | 3.9658       | 0.4095        | 100.0%                | 1983.73        | 1985.1135       | 1          | 7.335                                                                                                                                     | 60.0%       | 1        |  |  |  |  |  |  |  |  |  |
|                                                     | <a href="#">SmEgg202.01928.01928.2</a> | 3.8633       | 0.452         | 100.0%                | 2104.41        | 2105.1333       | 1          | 7.918                                                                                                                                     | 55.0%       | 2        |  |  |  |  |  |  |  |  |  |
|                                                     | <a href="#">SmEgg302.01974.01974.1</a> | 2.1014       | 0.2817        | 100.0%                | 1229.58        | 1230.3374       | 10         | 5.172                                                                                                                                     | 61.1%       | 1        |  |  |  |  |  |  |  |  |  |
| <a href="#">U</a>                                   | <b>TC22844 3 16-298</b>                | 4            | 5             | <a href="#">27.9%</a> | 283            | 31921           | 7.0        | similar to UP Q5DBE6_SCHJA (Q5DBE6)<br>SJCHGC05997 protein, complete                                                                      |             |          |  |  |  |  |  |  |  |  |  |
|                                                     | <b>Filename</b>                        | <b>XCorr</b> | <b>DeltCN</b> | <b>Conf%</b>          | <b>ObsM+H+</b> | <b>CalcM+H+</b> | <b>SpR</b> | <b>ZScore</b>                                                                                                                             | <b>Ion%</b> | <b>#</b> |  |  |  |  |  |  |  |  |  |
| *                                                   | <a href="#">SmEgg206.02704.02704.2</a> | 3.6891       | 0.3849        | 100.0%                | 2452.45        | 2452.7283       | 1          | 6.485                                                                                                                                     | 42.9%       | 1        |  |  |  |  |  |  |  |  |  |
| *                                                   | <a href="#">SmEgg102.03308.03308.2</a> | 3.4397       | 0.2664        | 99.8%                 | 2397.64        | 2398.6062       | 1          | 5.478                                                                                                                                     | 40.9%       | 1        |  |  |  |  |  |  |  |  |  |
| *                                                   | <a href="#">SmEgg305.02343.02343.2</a> | 2.4513       | 0.2623        | 97.7%                 | 1558.69        | 1558.6934       | 34         | 4.631                                                                                                                                     | 50.0%       | 1        |  |  |  |  |  |  |  |  |  |
|                                                     | <a href="#">SmEgg304.03566.03566.2</a> | 2.852        | 0.3179        | 99.8%                 | 2326.21        | 2327.4663       | 1          | 5.307                                                                                                                                     | 40.0%       | 1        |  |  |  |  |  |  |  |  |  |
| <a href="#">U</a>                                   | <b>TC31560 6 1-84</b>                  | 2            | 3             | <a href="#">27.4%</a> | 84             | 9678            | 6.3        | homologue to UP Q5BTJ4_SCHJA (Q5BTJ4)<br>SJCHGC00690 protein (Fragment), partial (80%)                                                    |             |          |  |  |  |  |  |  |  |  |  |
|                                                     | <b>Filename</b>                        | <b>XCorr</b> | <b>DeltCN</b> | <b>Conf%</b>          | <b>ObsM+H+</b> | <b>CalcM+H+</b> | <b>SpR</b> | <b>ZScore</b>                                                                                                                             | <b>Ion%</b> | <b>#</b> |  |  |  |  |  |  |  |  |  |
| *                                                   | <a href="#">SmEgg202.02398.02398.1</a> | 2.6707       | 0.2167        | 100.0%                | 1180.22        | 1181.2848       | 5          | 4.867                                                                                                                                     | 66.7%       | 1        |  |  |  |  |  |  |  |  |  |
|                                                     | <a href="#">SmEgg104.02355.02355.2</a> | 4.0086       | 0.2371        | 99.9%                 | 1536.43        | 1536.7686       | 1          | 4.678                                                                                                                                     | 79.2%       | 1        |  |  |  |  |  |  |  |  |  |
| <a href="#">U</a>                                   | <b>TC22179 2 15-161</b>                | 2            | 4             | <a href="#">27.2%</a> | 147            | 17199           | 8.8        | homologue to UP Q5D8K2_SCHJA (Q5D8K2)<br>SJCHGC06607 protein, complete                                                                    |             |          |  |  |  |  |  |  |  |  |  |
|                                                     | <b>Filename</b>                        | <b>XCorr</b> | <b>DeltCN</b> | <b>Conf%</b>          | <b>ObsM+H+</b> | <b>CalcM+H+</b> | <b>SpR</b> | <b>ZScore</b>                                                                                                                             | <b>Ion%</b> | <b>#</b> |  |  |  |  |  |  |  |  |  |
| *                                                   | <a href="#">SmEgg205.04422.04422.2</a> | 3.0657       | 0.1822        | 98.5%                 | 2973.77        | 2974.296        | 2          | 5.449                                                                                                                                     | 29.2%       | 3        |  |  |  |  |  |  |  |  |  |
| *                                                   | <a href="#">SmEgg205.03486.03486.2</a> | 3.154        | 0.2435        | 99.7%                 | 1805.6         | 1806.1547       | 2          | 4.682                                                                                                                                     | 50.0%       | 1        |  |  |  |  |  |  |  |  |  |
| <a href="#">U</a>                                   | <b>TC31619 2 3-448</b>                 | 11           | 26            | <a href="#">27.1%</a> | 446            | 49960           | 5.2        | homologue to UP Q5BL39_XENTR (Q5BL39)                                                                                                     |             |          |  |  |  |  |  |  |  |  |  |

Tubulin, beta 2a (Tubulin, beta 2), partial  
(98%)

| Filename                                 | XCorr  | DeltCN | Conf%  | ObsM+H+ | CalcM+H+  | SpR | ZScore | Ion%  | # |
|------------------------------------------|--------|--------|--------|---------|-----------|-----|--------|-------|---|
| <a href="#">SmEgg202.02993.02993.2</a>   | 3.5133 | 0.2538 | 99.8%  | 1617.45 | 1616.8701 | 1   | 4.619  | 71.4% | 1 |
| <a href="#">SmEgg303.03500.03500.2</a>   | 3.6035 | 0.2891 | 99.8%  | 1988.66 | 1989.2941 | 1   | 6.012  | 47.2% | 1 |
| 2 <a href="#">SmEgg206.02739.02739.2</a> | 3.8062 | 0.3411 | 99.9%  | 2413.04 | 2411.6414 | 1   | 5.798  | 42.9% | 1 |
| <a href="#">SmEgg204.02597.02597.2</a>   | 3.6504 | 0.2005 | 99.8%  | 1320.96 | 1320.5896 | 2   | 4.838  | 77.3% | 1 |
| <a href="#">SmEgg105.02879.02879.2</a>   | 3.504  | 0.2881 | 99.9%  | 1145.35 | 1144.4204 | 1   | 5.472  | 88.9% | 1 |
| <a href="#">SmEgg103.03402.03402.2</a>   | 3.7794 | 0.3911 | 100.0% | 1708.78 | 1708.9672 | 1   | 7.475  | 71.4% | 1 |
| <a href="#">SmEgg203.03579.03579.2</a>   | 2.8766 | 0.2893 | 99.7%  | 1621.58 | 1621.889  | 1   | 5.419  | 69.2% | 1 |
| <a href="#">SmEgg202.02088.02088.1</a>   | 2.8373 | 0.1797 | 99.2%  | 1446.57 | 1447.6031 | 2   | 4.413  | 68.2% | 1 |
| <a href="#">SmEgg102.02059.02059.2</a>   | 3.3796 | 0.121  | 99.4%  | 1447.53 | 1447.6031 | 1   | 3.718  | 77.3% | 1 |
| <a href="#">SmEgg203.03376.03376.2</a>   | 3.8064 | 0.3    | 99.9%  | 1697.48 | 1697.8877 | 3   | 6.532  | 61.5% | 1 |
| <a href="#">SmEgg206.03118.03118.2</a>   | 4.126  | 0.3353 | 100.0% | 1886.94 | 1887.2012 | 1   | 7.13   | 62.5% | 1 |

Similarities: [TC24300|35-138](#)(3:8)[TC334564|1-129](#)(2:9)

| Filename                                                                  | XCorr                                                                    | DeltCN | Conf%  | ObsM+H+ | CalcM+H+  | SpR | ZScore | Ion%  | # |
|---------------------------------------------------------------------------|--------------------------------------------------------------------------|--------|--------|---------|-----------|-----|--------|-------|---|
| <a href="#">U TC29022 2 1-207</a> 4 9 <a href="#">27.1%</a> 207 23997 6.2 | homologue to UP Q5DA50_SCHJA (Q5DA50) SJCHGC01287 protein, partial (91%) |        |        |         |           |     |        |       |   |
| * <a href="#">SmEgg104.02524.02524.2</a>                                  | 3.3589                                                                   | 0.2636 | 99.8%  | 2198.48 | 2198.4963 | 1   | 5.138  | 47.4% | 1 |
| <a href="#">SmEgg303.03393.03393.2</a>                                    | 3.3688                                                                   | 0.335  | 99.8%  | 2255.65 | 2255.4143 | 1   | 5.846  | 58.8% | 1 |
| <a href="#">SmEgg105.04446.04446.2</a>                                    | 3.5994                                                                   | 0.3021 | 99.8%  | 2171.03 | 2171.4644 | 2   | 6.144  | 41.2% | 1 |
| <a href="#">SmEgg303.04160.04160.2</a>                                    | 4.7987                                                                   | 0.2829 | 100.0% | 1817.68 | 1816.9716 | 1   | 5.567  | 64.3% | 1 |

| Filename                                                                   | XCorr          | DeltCN | Conf% | ObsM+H+ | CalcM+H+  | SpR | ZScore | Ion%  | # |
|----------------------------------------------------------------------------|----------------|--------|-------|---------|-----------|-----|--------|-------|---|
| <a href="#">U TC32967 2 17-118</a> 5 7 <a href="#">26.5%</a> 102 11904 4.4 | no description |        |       |         |           |     |        |       |   |
| * <a href="#">SmEgg202.02450.02450.1</a>                                   | 2.7426         | 0.1365 | 96.6% | 1135.48 | 1136.2902 | 30  | 4.091  | 75.0% | 1 |
| * <a href="#">SmEgg102.02399.02399.2</a>                                   | 3.0846         | 0.1377 | 99.7% | 1136.34 | 1136.2902 | 2   | 4.266  | 87.5% | 1 |
| * <a href="#">SmEgg103.02205.02205.2</a>                                   | 3.4452         | 0.2074 | 99.8% | 1264.31 | 1264.4644 | 1   | 4.733  | 88.9% | 1 |
| * <a href="#">SmEgg305.02627.02627.2</a>                                   | 2.4151         | 0.2329 | 95.7% | 1743.38 | 1743.9666 | 1   | 4.974  | 53.8% | 2 |
| * <a href="#">SmEgg306.02370.02370.2</a>                                   | 3.3793         | 0.2705 | 99.8% | 2077.46 | 2078.2617 | 1   | 5.841  | 62.5% | 2 |

| Filename                                                                   | XCorr                                                                                      | DeltCN | Conf% | ObsM+H+ | CalcM+H+  | SpR | ZScore | Ion%  | # |
|----------------------------------------------------------------------------|--------------------------------------------------------------------------------------------|--------|-------|---------|-----------|-----|--------|-------|---|
| <a href="#">U AM045760 1 44-138</a> 2 2 <a href="#">26.3%</a> 95 11557 5.2 | no description                                                                             |        |       |         |           |     |        |       |   |
| <a href="#">U TC24996 3 9-100</a> 2 2 <a href="#">27.2%</a> 92 10969 7.8   | weakly similar to UP Q71SZ0_9SCOM (Q71SZ0) Cytochrome c oxidase subunit VIb, partial (29%) |        |       |         |           |     |        |       |   |
| <a href="#">SmEgg104.01667.01667.2</a>                                     | 2.8431                                                                                     | 0.2399 | 99.8% | 1047.24 | 1047.1558 | 60  | 4.527  | 75.0% | 1 |
| <a href="#">SmEgg205.03675.03675.2</a>                                     | 3.5626                                                                                     | 0.3573 | 99.9% | 2005.02 | 2005.247  | 1   | 6.962  | 63.3% | 1 |

| Filename                                                                  | XCorr          | DeltCN | Conf%  | ObsM+H+ | CalcM+H+  | SpR | ZScore | Ion%  | # |
|---------------------------------------------------------------------------|----------------|--------|--------|---------|-----------|-----|--------|-------|---|
| <a href="#">U CD117337 5 76-144</a> 2 3 <a href="#">26.1%</a> 69 7930 5.7 | no description |        |        |         |           |     |        |       |   |
| * <a href="#">SmEgg202.03173.03173.2</a>                                  | 3.8642         | 0.3626 | 100.0% | 1962.67 | 1963.1077 | 1   | 7.082  | 56.7% | 1 |
| * <a href="#">SmEgg302.03023.03023.2</a>                                  | 3.1388         | 0.1081 | 96.3%  | 2018.18 | 2018.187  | 1   | 4.368  | 60.0% | 1 |

| Filename                                                                  | XCorr                                                                  | DeltCN | Conf% | ObsM+H+ | CalcM+H+  | SpR | ZScore | Ion%  | # |
|---------------------------------------------------------------------------|------------------------------------------------------------------------|--------|-------|---------|-----------|-----|--------|-------|---|
| <a href="#">U TC26569 2 7-150</a> 2 3 <a href="#">25.7%</a> 144 16412 7.8 | UP Q58HK3_SCHMA (Q58HK3) Mitochondrial thioredoxin precursor, complete |        |       |         |           |     |        |       |   |
| * <a href="#">SmEgg102.02781.02781.2</a>                                  | 3.3684                                                                 | 0.1704 | 99.4% | 2559.81 | 2559.705  | 1   | 5.153  | 35.7% | 2 |
| * <a href="#">SmEgg105.02667.02667.2</a>                                  | 3.1161                                                                 | 0.2523 | 99.7% | 1634.3  | 1634.9187 | 1   | 5.576  | 60.7% | 1 |

| Filename                                                                   | XCorr                                                    | DeltCN | Conf% | ObsM+H+ | CalcM+H+  | SpR | ZScore | Ion%  | # |
|----------------------------------------------------------------------------|----------------------------------------------------------|--------|-------|---------|-----------|-----|--------|-------|---|
| <a href="#">U TC26985 2 10-203</a> 5 7 <a href="#">25.3%</a> 194 21618 7.2 | similar to UP O45038_SCHJA (O45038) HSP70, partial (31%) |        |       |         |           |     |        |       |   |
| <a href="#">SmEgg102.02406.02406.2</a>                                     | 2.7814                                                   | 0.2423 | 98.9% | 1567.62 | 1567.7386 | 1   | 6.25   | 65.4% | 1 |



|   |                                        |        |        |        |         |           |   |       |       |   |
|---|----------------------------------------|--------|--------|--------|---------|-----------|---|-------|-------|---|
|   | <a href="#">SmEgg302.02675.02675.2</a> | 2.9336 | 0.1991 | 98.2%  | 1638.74 | 1638.8174 | 3 | 4.622 | 50.0% | : |
|   | <a href="#">SmEgg302.02687.02687.2</a> | 3.4308 | 0.3331 | 99.8%  | 1709.12 | 1709.8962 | 1 | 6.51  | 63.3% | : |
| * | <a href="#">SmEgg202.02460.02460.2</a> | 5.1626 | 0.3889 | 100.0% | 1706.51 | 1706.8497 | 1 | 7.693 | 75.0% | : |
|   | <a href="#">SmEgg202.03711.03711.2</a> | 3.4638 | 0.3931 | 99.9%  | 1492.51 | 1493.7583 | 1 | 6.793 | 73.1% | : |

Similarities: [TC25063|2|48-576\(1:4\)](#)

|          |                                        |              |               |                       |                |                 |            |                                                                                |             |          |  |
|----------|----------------------------------------|--------------|---------------|-----------------------|----------------|-----------------|------------|--------------------------------------------------------------------------------|-------------|----------|--|
| <u>U</u> | <b>TC25303 2 12-122</b>                | 2            | 4             | <a href="#">25.2%</a> | 111            | 12850           | 8.8        | similar to UP Q86F27_SCHJA (Q86F27) Clone ZSD1165 mRNA sequence, partial (64%) |             |          |  |
|          | <b>Filename</b>                        | <b>XCorr</b> | <b>DeltCN</b> | <b>Conf%</b>          | <b>ObsM+H+</b> | <b>CalcM+H+</b> | <b>SpR</b> | <b>ZScore</b>                                                                  | <b>Ion%</b> | <b>#</b> |  |
| *        | <a href="#">SmEgg104.02359.02359.2</a> | 3.6228       | 0.2624        | 99.9%                 | 1301.25        | 1301.526        | 1          | 5.231                                                                          | 81.8%       | 1        |  |
| *        | <a href="#">SmEgg202.03811.03811.2</a> | 2.8513       | 0.2684        | 99.5%                 | 1914.82        | 1916.0961       | 1          | 5.143                                                                          | 56.7%       | 3        |  |

|          |                                        |              |               |                       |                |                 |            |                                                                                                                             |             |          |  |
|----------|----------------------------------------|--------------|---------------|-----------------------|----------------|-----------------|------------|-----------------------------------------------------------------------------------------------------------------------------|-------------|----------|--|
| <u>U</u> | <b>TC23121 3 19-406</b>                | 7            | 9             | <a href="#">25.0%</a> | 388            | 43729           | 5.9        | weakly similar to UP Q4RIP2_TETNG (Q4RIP2) Chromosome 7 SCAF15042, whole genome shotgun sequence. (Fragment), partial (30%) |             |          |  |
|          | <b>Filename</b>                        | <b>XCorr</b> | <b>DeltCN</b> | <b>Conf%</b>          | <b>ObsM+H+</b> | <b>CalcM+H+</b> | <b>SpR</b> | <b>ZScore</b>                                                                                                               | <b>Ion%</b> | <b>#</b> |  |
| *        | <a href="#">SmEgg305.02564.02564.2</a> | 3.3472       | 0.1344        | 98.8%                 | 1517.51        | 1517.7251       | 2          | 4.203                                                                                                                       | 65.4%       | :        |  |
| *        | <a href="#">SmEgg102.03089.03089.2</a> | 4.1852       | 0.3764        | 100.0%                | 2408.49        | 2408.5579       | 1          | 7.073                                                                                                                       | 45.2%       | :        |  |
| *        | <a href="#">SmEgg303.04159.04159.2</a> | 3.5233       | 0.3266        | 99.9%                 | 2687.65        | 2688.9482       | 1          | 6.18                                                                                                                        | 39.6%       | :        |  |
| *        | <a href="#">SmEgg102.03834.03834.2</a> | 4.7123       | 0.4739        | 100.0%                | 2074.57        | 2075.2798       | 1          | 7.234                                                                                                                       | 61.1%       | :        |  |
| *        | <a href="#">SmEgg206.02388.02388.2</a> | 2.8199       | 0.1134        | 98.0%                 | 1027.42        | 1027.2548       | 23         | 4.476                                                                                                                       | 75.0%       | :        |  |
| *        | <a href="#">SmEgg205.03637.03637.2</a> | 3.9954       | 0.3403        | 100.0%                | 2666.99        | 2667.978        | 1          | 6.09                                                                                                                        | 39.1%       | :        |  |
| *        | <a href="#">SmEgg304.02914.02914.2</a> | 3.071        | 0.304         | 99.8%                 | 1961.66        | 1962.2096       | 3          | 5.406                                                                                                                       | 38.2%       | :        |  |

|          |                                        |              |               |                       |                |                 |            |                |             |          |  |
|----------|----------------------------------------|--------------|---------------|-----------------------|----------------|-----------------|------------|----------------|-------------|----------|--|
| <u>U</u> | <b>CD098447 3 20-99</b>                | 2            | 2             | <a href="#">25.0%</a> | 80             | 9989            | 8.6        | no description |             |          |  |
|          | <b>Filename</b>                        | <b>XCorr</b> | <b>DeltCN</b> | <b>Conf%</b>          | <b>ObsM+H+</b> | <b>CalcM+H+</b> | <b>SpR</b> | <b>ZScore</b>  | <b>Ion%</b> | <b>#</b> |  |
| *        | <a href="#">SmEgg204.01686.01686.2</a> | 3.0381       | 0.1883        | 99.7%                 | 1252.45        | 1253.3263       | 2          | 4.627          | 77.8%       | 1        |  |
| 2        | <a href="#">SmEgg204.01221.01221.2</a> | 2.668        | 0.2184        | 99.1%                 | 1151.42        | 1151.2241       | 3          | 4.847          | 72.2%       | 1        |  |

Similarities: [TC27701|2|1-230\(1:1\)](#)

|          |                                        |              |               |                       |                |                 |            |                                                                        |             |          |  |
|----------|----------------------------------------|--------------|---------------|-----------------------|----------------|-----------------|------------|------------------------------------------------------------------------|-------------|----------|--|
| <u>U</u> | <b>TC21359 1 17-173</b>                | 6            | 10            | <a href="#">24.8%</a> | 157            | 18027           | 9.4        | similar to UP Q5DD64_SCHJA (Q5DD64) SJCHGC00495 protein, partial (54%) |             |          |  |
|          | <b>Filename</b>                        | <b>XCorr</b> | <b>DeltCN</b> | <b>Conf%</b>          | <b>ObsM+H+</b> | <b>CalcM+H+</b> | <b>SpR</b> | <b>ZScore</b>                                                          | <b>Ion%</b> | <b>#</b> |  |
|          | <a href="#">SmEgg305.02865.02865.2</a> | 4.1771       | 0.3974        | 100.0%                | 1756.76        | 1756.0116       | 1          | 7.554                                                                  | 55.9%       | :        |  |
|          | <a href="#">SmEgg305.02643.02643.2</a> | 2.9164       | 0.256         | 99.5%                 | 1521.15        | 1521.7568       | 2          | 5.025                                                                  | 53.3%       | :        |  |
|          | <a href="#">SmEgg204.02152.02152.2</a> | 3.0035       | 0.1453        | 99.8%                 | 897.86         | 898.09344       | 1          | 4.767                                                                  | 92.9%       | :        |  |
| *        | <a href="#">SmEgg204.01960.01960.1</a> | 2.4517       | 0.2471        | 100.0%                | 1223.59        | 1224.3765       | 9          | 5.16                                                                   | 66.7%       | :        |  |
| *        | <a href="#">SmEgg204.01961.01961.2</a> | 3.1917       | 0.1348        | 99.6%                 | 1224.12        | 1224.3765       | 1          | 5.004                                                                  | 72.2%       | :        |  |
| *        | <a href="#">SmEgg303.01952.01952.1</a> | 2.669        | 0.3261        | 100.0%                | 1370.55        | 1371.4485       | 1          | 6.587                                                                  | 65.0%       | :        |  |

|          |                                        |              |               |                       |                |                 |            |                                                                        |             |          |  |
|----------|----------------------------------------|--------------|---------------|-----------------------|----------------|-----------------|------------|------------------------------------------------------------------------|-------------|----------|--|
| <u>U</u> | <b>TC24682 3 26-272</b>                | 4            | 9             | <a href="#">24.7%</a> | 247            | 28031           | 8.5        | similar to UP Q5DDI4_SCHJA (Q5DDI4) SJCHGC02704 protein, partial (92%) |             |          |  |
|          | <b>Filename</b>                        | <b>XCorr</b> | <b>DeltCN</b> | <b>Conf%</b>          | <b>ObsM+H+</b> | <b>CalcM+H+</b> | <b>SpR</b> | <b>ZScore</b>                                                          | <b>Ion%</b> | <b>#</b> |  |
| *        | <a href="#">SmEgg104.02530.02530.2</a> | 3.8619       | 0.3859        | 100.0%                | 1562.56        | 1562.7319       | 1          | 6.593                                                                  | 75.0%       | :        |  |
| *        | <a href="#">SmEgg202.03705.03705.2</a> | 5.4042       | 0.3857        | 100.0%                | 2134.36        | 2134.3545       | 1          | 8.289                                                                  | 65.8%       | :        |  |
| *        | <a href="#">SmEgg105.02754.02754.2</a> | 3.8672       | 0.3475        | 100.0%                | 1660.49        | 1660.8699       | 1          | 5.61                                                                   | 65.4%       | :        |  |
| *        | <a href="#">SmEgg202.04379.04379.2</a> | 4.2939       | 0.4119        | 100.0%                | 1662.7         | 1662.84         | 1          | 7.311                                                                  | 76.9%       | :        |  |

|          |                                        |              |               |                       |                |                 |            |                                                                                                                                     |             |          |  |
|----------|----------------------------------------|--------------|---------------|-----------------------|----------------|-----------------|------------|-------------------------------------------------------------------------------------------------------------------------------------|-------------|----------|--|
| <u>U</u> | <b>TC28836 2 17-150</b>                | 2            | 2             | <a href="#">24.6%</a> | 134            | 15780           | 7.5        | weakly similar to GB 1AK6 2624592 1AK6 Destrin, Nmr, Minimized Average Structure. {Sus scrofa} (exp=-1; wgp=0; cg=0), partial (11%) |             |          |  |
|          | <b>Filename</b>                        | <b>XCorr</b> | <b>DeltCN</b> | <b>Conf%</b>          | <b>ObsM+H+</b> | <b>CalcM+H+</b> | <b>SpR</b> | <b>ZScore</b>                                                                                                                       | <b>Ion%</b> | <b>#</b> |  |
| *        | <a href="#">SmEgg202.03655.03655.2</a> | 3.489        | 0.325         | 99.8%                 | 2218.45        | 2219.489        | 1          | 5.437                                                                                                                               | 50.0%       | 1        |  |
|          | <a href="#">SmEgg203.02567.02567.2</a> | 3.2629       | 0.2891        | 99.8%                 | 1840.76        | 1840.9438       | 1          | 6.361                                                                                                                               | 67.9%       | 1        |  |

|          |                         |   |   |                       |     |       |     |                |  |  |  |
|----------|-------------------------|---|---|-----------------------|-----|-------|-----|----------------|--|--|--|
| <u>U</u> | <b>CD190498 6 1-123</b> | 4 | 6 | <a href="#">24.4%</a> | 123 | 13851 | 6.1 | no description |  |  |  |
|----------|-------------------------|---|---|-----------------------|-----|-------|-----|----------------|--|--|--|

|   | Filename                               | XCorr  | DeltCN | Conf%  | ObsM+H+ | CalcM+H+  | SpR | ZScore | Ion%  | # |
|---|----------------------------------------|--------|--------|--------|---------|-----------|-----|--------|-------|---|
| * | <a href="#">SmEgg203.02663.02663.2</a> | 2.7502 | 0.1189 | 95.9%  | 1323.01 | 1323.4576 | 9   | 3.914  | 70.0% | 1 |
| * | <a href="#">SmEgg102.02407.02407.2</a> | 4.9981 | 0.3573 | 100.0% | 1452.54 | 1452.5609 | 1   | 7.165  | 83.3% | 1 |
| * | <a href="#">SmEgg202.02457.02457.1</a> | 2.9641 | 0.3262 | 100.0% | 1452.58 | 1452.5609 | 1   | 5.759  | 66.7% | 1 |
| * | <a href="#">SmEgg302.02778.02778.2</a> | 3.1535 | 0.2408 | 99.7%  | 1934.39 | 1934.1564 | 1   | 5.26   | 50.0% | 1 |

**U TC21863|1|18-153** 8 22 [24.3%](#) 136 14686 5.7 no description

|   | Filename                               | XCorr  | DeltCN | Conf%  | ObsM+H+ | CalcM+H+  | SpR | ZScore | Ion%  | # |
|---|----------------------------------------|--------|--------|--------|---------|-----------|-----|--------|-------|---|
| * | <a href="#">SmEgg105.01870.01870.1</a> | 2.5761 | 0.2877 | 100.0% | 1329.42 | 1330.3684 | 2   | 5.551  | 55.0% | 1 |
| * | <a href="#">SmEgg105.01987.01987.2</a> | 2.9385 | 0.2801 | 99.8%  | 1329.77 | 1330.3684 | 1   | 5.665  | 75.0% | 1 |
| * | <a href="#">SmEgg205.01951.01951.1</a> | 2.8273 | 0.2296 | 100.0% | 1193.6  | 1193.2273 | 2   | 4.77   | 66.7% | 1 |
| * | <a href="#">SmEgg404.01270.01270.1</a> | 1.7936 | 0.2839 | 99.2%  | 1032.48 | 1033.0885 | 34  | 5.147  | 56.2% | 1 |
| * | <a href="#">SmEgg304.00915.00915.2</a> | 2.8685 | 0.2778 | 99.8%  | 1034.19 | 1033.0885 | 1   | 4.781  | 87.5% | 1 |
| * | <a href="#">SmEgg304.01603.01603.1</a> | 2.2816 | 0.226  | 99.3%  | 1195.63 | 1196.2645 | 13  | 4.975  | 61.1% | 1 |
| * | <a href="#">SmEgg404.01956.01956.1</a> | 1.955  | 0.2213 | 96.1%  | 1355.53 | 1356.4033 | 28  | 5.184  | 50.0% | 1 |
| * | <a href="#">SmEgg103.03481.03481.2</a> | 2.9668 | 0.2639 | 99.7%  | 2347.78 | 2349.3706 | 1   | 5.58   | 44.7% | 1 |

**U TC25599|1|5-290** 8 34 [24.1%](#) 286 33857 6.1 no description

|   | Filename                               | XCorr  | DeltCN | Conf%  | ObsM+H+ | CalcM+H+  | SpR | ZScore | Ion%   | # |
|---|----------------------------------------|--------|--------|--------|---------|-----------|-----|--------|--------|---|
| * | <a href="#">SmEgg203.03839.03839.2</a> | 5.3521 | 0.3759 | 100.0% | 2006.38 | 2008.1974 | 1   | 7.729  | 83.3%  | 1 |
|   | <a href="#">SmEgg204.04539.04539.2</a> | 4.5025 | 0.3451 | 100.0% | 2381.86 | 2382.7156 | 1   | 6.512  | 52.6%  | 1 |
|   | <a href="#">SmEgg404.00002.00002.2</a> | 3.0312 | 0.3004 | 99.7%  | 2039.23 | 2040.2769 | 1   | 5.771  | 59.4%  | 1 |
|   | <a href="#">SmEgg304.04039.04039.2</a> | 3.3861 | 0.2521 | 99.8%  | 2167.75 | 2168.451  | 1   | 5.327  | 50.0%  | 1 |
|   | <a href="#">SmEgg205.02119.02119.1</a> | 2.2021 | 0.2343 | 99.1%  | 890.49  | 891.05804 | 12  | 4.777  | 71.4%  | 1 |
|   | <a href="#">SmEgg205.02122.02122.2</a> | 3.2046 | 0.2651 | 99.9%  | 890.64  | 891.05804 | 1   | 5.446  | 100.0% | 1 |
|   | <a href="#">SmEgg202.02441.02441.1</a> | 2.0528 | 0.2042 | 96.1%  | 1294.58 | 1295.4753 | 1   | 4.71   | 59.1%  | 1 |
|   | <a href="#">SmEgg102.01621.01621.2</a> | 3.4655 | 0.1797 | 99.8%  | 1502.65 | 1503.5316 | 2   | 4.515  | 66.7%  | 1 |

**U TC25497|3|15-226** 5 12 [24.1%](#) 212 23894 8.5 UP|KAD\_SCHMA (P25824) Adenylate kinase (ATP-AMP transphosphorylase) (AK), complete

|   | Filename                               | XCorr  | DeltCN | Conf%  | ObsM+H+ | CalcM+H+  | SpR | ZScore | Ion%  | # |
|---|----------------------------------------|--------|--------|--------|---------|-----------|-----|--------|-------|---|
| * | <a href="#">SmEgg206.02527.02527.1</a> | 2.6548 | 0.2239 | 100.0% | 1130.75 | 1131.3605 | 2   | 5.18   | 68.2% | 1 |
| * | <a href="#">SmEgg205.02873.02873.2</a> | 3.6383 | 0.2632 | 99.9%  | 1131.4  | 1131.3605 | 1   | 5.675  | 81.8% | 1 |
| * | <a href="#">SmEgg106.03788.03788.2</a> | 3.7532 | 0.3794 | 100.0% | 1493.41 | 1493.8705 | 1   | 7.476  | 84.6% | 1 |
| * | <a href="#">SmEgg205.02662.02662.2</a> | 3.1615 | 0.2531 | 99.8%  | 1392.47 | 1392.5231 | 1   | 4.856  | 80.0% | 1 |
| * | <a href="#">SmEgg105.02458.02458.2</a> | 4.123  | 0.3579 | 100.0% | 1719.09 | 1719.978  | 1   | 6.639  | 73.1% | 1 |

**U CD081971|5|138-224** 3 11 [24.1%](#) 87 9740 7.1 similar to GP|960280|gb|AAA92150.1| TPBF gene product {Acanthamoeba castellanii}, partial (4%)

**U TC30374|3|1-94** 3 11 [22.3%](#) 94 10384 7.0 similar to UP|Q3P5H8\_9GAMM (Q3P5H8) Cation efflux protein, partial (5%)

|  | Filename                               | XCorr  | DeltCN | Conf%  | ObsM+H+ | CalcM+H+  | SpR | ZScore | Ion%  | # |
|--|----------------------------------------|--------|--------|--------|---------|-----------|-----|--------|-------|---|
|  | <a href="#">SmEgg204.00819.00819.1</a> | 2.3588 | 0.3461 | 100.0% | 1371.59 | 1372.3662 | 1   | 5.743  | 65.0% | 1 |
|  | <a href="#">SmEgg104.00783.00783.2</a> | 3.0935 | 0.3351 | 99.9%  | 1371.97 | 1372.3662 | 1   | 6.446  | 70.0% | 6 |
|  | <a href="#">SmEgg204.00682.00682.2</a> | 2.8051 | 0.2123 | 99.6%  | 995.05  | 994.9963  | 5   | 5.488  | 77.8% | 4 |

**U TC21473|2|12-274** 3 4 [24.0%](#) 263 29751 7.7 similar to UP|Q86EG4\_SCHJA (Q86EG4) Clone ZSD429 mRNA sequence, partial (95%)

|   | Filename                               | XCorr  | DeltCN | Conf%  | ObsM+H+ | CalcM+H+  | SpR | ZScore | Ion%  | # |
|---|----------------------------------------|--------|--------|--------|---------|-----------|-----|--------|-------|---|
|   | <a href="#">SmEgg202.04715.04715.2</a> | 2.9353 | 0.2842 | 99.7%  | 2635.69 | 2635.9255 | 1   | 5.46   | 34.0% | 1 |
| * | <a href="#">SmEgg106.03556.03556.2</a> | 4.8955 | 0.3598 | 100.0% | 2261.34 | 2261.5662 | 1   | 7.885  | 61.8% | 1 |
| * | <a href="#">SmEgg205.04322.04322.2</a> | 3.3522 | 0.3057 | 99.8%  | 2027.58 | 2028.2762 | 1   | 6.002  | 41.7% | 1 |

**U TC29256|1|21-368** 4 9 [23.3%](#) 348 37728 5.7 similar to UP|TCPH\_CHICK (Q5ZJK8)

|   |                                        |        |        |              |         |           |     |                                                                                                                                                     |       | T-complex protein 1 subunit eta (TCP-1-eta)<br>(CCT-eta), partial (61%) |  |  |
|---|----------------------------------------|--------|--------|--------------|---------|-----------|-----|-----------------------------------------------------------------------------------------------------------------------------------------------------|-------|-------------------------------------------------------------------------|--|--|
|   | Filename                               | XCorr  | DeltCN | Conf%        | ObsM+H+ | CalcM+H+  | SpR | ZScore                                                                                                                                              | Ion%  | #                                                                       |  |  |
| * | <a href="#">SmEgg102.03745.03745.2</a> | 3.0327 | 0.2992 | 99.7%        | 2819.89 | 2820.0056 | 1   | 5.719                                                                                                                                               | 32.7% | 1                                                                       |  |  |
| * | <a href="#">SmEgg202.04131.04131.2</a> | 4.2346 | 0.3987 | 100.0%       | 2266.76 | 2267.4949 | 1   | 8.291                                                                                                                                               | 42.9% | 4                                                                       |  |  |
| * | <a href="#">SmEgg104.04523.04523.2</a> | 3.9628 | 0.2362 | 99.8%        | 1745.65 | 1746.0972 | 1   | 6.12                                                                                                                                                | 63.3% | 1                                                                       |  |  |
| * | <a href="#">SmEgg304.03571.03571.2</a> | 2.8145 | 0.1706 | 96.4%        | 1935.7  | 1937.1565 | 7   | 5.114                                                                                                                                               | 43.3% | 1                                                                       |  |  |
| U | <b>TC20551 1 34-245</b>                | 3      | 7      | <b>23.1%</b> | 212     | 23856     | 5.6 | homologue to UP Q86E06_SCHJA (Q86E06)<br>Clone ZZZ362 mRNA sequence, partial (88%)                                                                  |       |                                                                         |  |  |
|   | Filename                               | XCorr  | DeltCN | Conf%        | ObsM+H+ | CalcM+H+  | SpR | ZScore                                                                                                                                              | Ion%  | #                                                                       |  |  |
| * | <a href="#">SmEgg104.03395.03395.2</a> | 4.5645 | 0.2726 | 100.0%       | 2027.4  | 2027.2871 | 1   | 6.718                                                                                                                                               | 58.8% | 1                                                                       |  |  |
| * | <a href="#">SmEgg105.03921.03921.2</a> | 3.7001 | 0.3645 | 99.9%        | 1780.39 | 1781.0771 | 1   | 7.341                                                                                                                                               | 53.6% | 1                                                                       |  |  |
| * | <a href="#">SmEgg205.00078.00078.2</a> | 4.3955 | 0.3152 | 100.0%       | 1979.98 | 1981.1885 | 1   | 6.422                                                                                                                                               | 66.7% | 4                                                                       |  |  |
| U | <b>TC32420 3 1-168</b>                 | 4      | 19     | <b>22.6%</b> | 168     | 19021     | 9.4 | weakly similar to<br>RF XP_811400.1 71420196 XM_806307 mucin<br>TcMUCI {Trypanosoma cruzi strain CL Brener}<br>(exp=-1; wgp=0; cg=0), partial (37%) |       |                                                                         |  |  |
|   | Filename                               | XCorr  | DeltCN | Conf%        | ObsM+H+ | CalcM+H+  | SpR | ZScore                                                                                                                                              | Ion%  | #                                                                       |  |  |
| * | <a href="#">SmEgg204.03927.03927.3</a> | 4.9085 | 0.3741 | 100.0%       | 3287.28 | 3286.5916 | 1   | 6.232                                                                                                                                               | 35.2% | 1                                                                       |  |  |
| * | <a href="#">SmEgg203.04166.04166.2</a> | 3.8706 | 0.3763 | 100.0%       | 3157.54 | 3158.4175 | 1   | 7.104                                                                                                                                               | 36.5% | 1                                                                       |  |  |
| * | <a href="#">SmEgg202.04115.04115.3</a> | 5.4481 | 0.4123 | 100.0%       | 3158.0  | 3158.4175 | 1   | 6.96                                                                                                                                                | 33.7% | 1                                                                       |  |  |
| * | <a href="#">SmEgg202.02126.02126.2</a> | 2.8403 | 0.2144 | 99.7%        | 1151.04 | 1151.3048 | 11  | 4.228                                                                                                                                               | 72.2% | 1                                                                       |  |  |
| U | <b>TC23466 2 1-555</b>                 | 8      | 13     | <b>22.5%</b> | 555     | 61376     | 7.9 | similar to UP Q6P3L9_BRARE (Q6P3L9)<br>Glutamate dehydrogenase 1, partial (80%)                                                                     |       |                                                                         |  |  |
|   | Filename                               | XCorr  | DeltCN | Conf%        | ObsM+H+ | CalcM+H+  | SpR | ZScore                                                                                                                                              | Ion%  | #                                                                       |  |  |
| * | <a href="#">SmEgg103.03781.03781.2</a> | 3.5474 | 0.288  | 99.8%        | 2271.63 | 2272.4907 | 1   | 5.76                                                                                                                                                | 50.0% | 1                                                                       |  |  |
|   | <a href="#">SmEgg203.02454.02454.2</a> | 3.1193 | 0.0527 | 95.4%        | 1220.5  | 1220.3771 | 18  | 3.711                                                                                                                                               | 68.2% | 1                                                                       |  |  |
| * | <a href="#">SmEgg203.02827.02827.2</a> | 3.2684 | 0.3966 | 99.9%        | 1969.31 | 1971.1951 | 3   | 7.023                                                                                                                                               | 36.8% | 1                                                                       |  |  |
| * | <a href="#">SmEgg205.02754.02754.2</a> | 3.3849 | 0.1635 | 99.5%        | 1588.45 | 1588.763  | 1   | 4.615                                                                                                                                               | 65.4% | 1                                                                       |  |  |
| * | <a href="#">SmEgg102.03105.03105.2</a> | 3.8816 | 0.2385 | 99.8%        | 2218.89 | 2217.4065 | 1   | 6.072                                                                                                                                               | 47.4% | 1                                                                       |  |  |
|   | <a href="#">SmEgg306.02996.02996.2</a> | 2.9632 | 0.1829 | 99.8%        | 1113.26 | 1113.3013 | 10  | 4.622                                                                                                                                               | 85.7% | 1                                                                       |  |  |
| * | <a href="#">SmEgg202.03279.03279.2</a> | 4.7016 | 0.3771 | 100.0%       | 1866.6  | 1867.0227 | 1   | 7.296                                                                                                                                               | 63.3% | 1                                                                       |  |  |
| * | <a href="#">SmEgg204.02920.02920.2</a> | 3.3121 | 0.2601 | 99.8%        | 1906.01 | 1906.1484 | 2   | 5.723                                                                                                                                               | 50.0% | 1                                                                       |  |  |
| U | <b>TC22123 3 1-151</b>                 | 2      | 2      | <b>22.5%</b> | 151     | 17038     | 6.5 | no description                                                                                                                                      |       |                                                                         |  |  |
|   | Filename                               | XCorr  | DeltCN | Conf%        | ObsM+H+ | CalcM+H+  | SpR | ZScore                                                                                                                                              | Ion%  | #                                                                       |  |  |
|   | <a href="#">SmEgg106.03412.03412.2</a> | 4.3171 | 0.3305 | 100.0%       | 1794.56 | 1795.129  | 1   | 6.445                                                                                                                                               | 71.4% | 1                                                                       |  |  |
| * | <a href="#">SmEgg104.03475.03475.2</a> | 2.8931 | 0.2662 | 99.5%        | 1980.02 | 1980.2279 | 1   | 5.54                                                                                                                                                | 44.4% | 1                                                                       |  |  |
| U | <b>TC28939 3 7-176</b>                 | 2      | 3      | <b>22.4%</b> | 170     | 19332     | 5.3 | homologue to UP Q5BYS4_SCHJA (Q5BYS4)<br>SJCHGC05902 protein (Fragment), partial (55%)                                                              |       |                                                                         |  |  |
|   | Filename                               | XCorr  | DeltCN | Conf%        | ObsM+H+ | CalcM+H+  | SpR | ZScore                                                                                                                                              | Ion%  | #                                                                       |  |  |
| * | <a href="#">SmEgg203.03934.03934.2</a> | 3.9375 | 0.3084 | 99.9%        | 1998.21 | 1998.3702 | 1   | 5.899                                                                                                                                               | 50.0% | 2                                                                       |  |  |
| * | <a href="#">SmEgg102.02707.02707.2</a> | 2.9973 | 0.1669 | 97.6%        | 2375.52 | 2374.4382 | 2   | 4.389                                                                                                                                               | 41.7% | 1                                                                       |  |  |
| U | <b>TC19791 2 102-289</b>               | 3      | 7      | <b>22.3%</b> | 188     | 22119     | 8.0 | UP SM21_SCHMA (P32070) Antigen Sm21.7,<br>complete                                                                                                  |       |                                                                         |  |  |
|   | Filename                               | XCorr  | DeltCN | Conf%        | ObsM+H+ | CalcM+H+  | SpR | ZScore                                                                                                                                              | Ion%  | #                                                                       |  |  |
| * | <a href="#">SmEgg205.03530.03530.2</a> | 3.763  | 0.1777 | 99.8%        | 1268.14 | 1268.5419 | 1   | 4.458                                                                                                                                               | 83.3% | 1                                                                       |  |  |
| * | <a href="#">SmEgg103.03931.03931.2</a> | 3.1909 | 0.2561 | 99.8%        | 1578.07 | 1577.7771 | 2   | 5.222                                                                                                                                               | 62.5% | 1                                                                       |  |  |
| * | <a href="#">SmEgg204.03176.03176.2</a> | 3.5323 | 0.2523 | 99.8%        | 2012.66 | 2013.3569 | 1   | 6.222                                                                                                                                               | 47.2% | 5                                                                       |  |  |
| U | <b>TC31070 3 5-269</b>                 | 5      | 11     | <b>21.5%</b> | 265     | 30631     | 4.5 | homologue to UP Q5DHV7_SCHJA (Q5DHV7)                                                                                                               |       |                                                                         |  |  |

| SJCHGC01881 protein, complete |                                        |        |        |        |         |           |     |        |       |   |
|-------------------------------|----------------------------------------|--------|--------|--------|---------|-----------|-----|--------|-------|---|
|                               | Filename                               | XCorr  | DeltCN | Conf%  | ObsM+H+ | CalcM+H+  | SpR | ZScore | Ion%  | # |
| *                             | <a href="#">SmEgg204.00467.00467.3</a> | 4.2554 | 0.4027 | 100.0% | 4769.93 | 4771.0703 | 1   | 6.435  | 18.0% | 1 |
|                               | <a href="#">SmEgg304.00047.00047.2</a> | 2.8613 | 0.157  | 96.1%  | 2502.29 | 2503.636  | 2   | 4.744  | 38.1% | 1 |
|                               | <a href="#">SmEgg304.00060.00060.2</a> | 4.1252 | 0.2285 | 99.8%  | 2317.81 | 2315.453  | 1   | 5.439  | 44.7% | 1 |
|                               | <a href="#">SmEgg404.00294.00294.2</a> | 2.6455 | 0.1888 | 95.5%  | 2200.36 | 2201.3489 | 1   | 5.096  | 50.0% | 1 |
| *                             | <a href="#">SmEgg402.04364.04364.2</a> | 2.9874 | 0.3829 | 99.8%  | 1712.14 | 1711.7474 | 1   | 6.99   | 66.7% | 1 |

| UP Q5DE19_SCHJA (Q5DE19)<br>SJCHGC05820 protein, complete |                                        |        |        |       |         |           |     |        |       |   |
|-----------------------------------------------------------|----------------------------------------|--------|--------|-------|---------|-----------|-----|--------|-------|---|
|                                                           | Filename                               | XCorr  | DeltCN | Conf% | ObsM+H+ | CalcM+H+  | SpR | ZScore | Ion%  | # |
|                                                           | <a href="#">SmEgg106.03806.03806.2</a> | 3.7171 | 0.2353 | 99.8% | 2164.59 | 2164.4607 | 6   | 5.671  | 40.0% | 1 |
|                                                           | <a href="#">SmEgg106.03825.03825.2</a> | 4.0412 | 0.231  | 99.8% | 2076.47 | 2077.3826 | 1   | 5.367  | 57.9% | 1 |
|                                                           | <a href="#">SmEgg104.04525.04525.2</a> | 4.2107 | 0.3009 | 99.9% | 1934.68 | 1935.2249 | 1   | 7.251  | 52.9% | 1 |
|                                                           | <a href="#">SmEgg206.02219.02219.2</a> | 2.8286 | 0.0254 | 97.4% | 850.67  | 851.0396  | 3   | 2.813  | 91.7% | 1 |

Similarities: [TC31134|3|2-119](#)(1:3)

| similar to UP Q5DA59_SCHJA (Q5DA59)<br>SJCHGC01783 protein, partial (98%) |                                        |        |        |        |         |           |     |        |       |   |
|---------------------------------------------------------------------------|----------------------------------------|--------|--------|--------|---------|-----------|-----|--------|-------|---|
|                                                                           | Filename                               | XCorr  | DeltCN | Conf%  | ObsM+H+ | CalcM+H+  | SpR | ZScore | Ion%  | # |
| *                                                                         | <a href="#">SmEgg202.03949.03949.2</a> | 4.3963 | 0.5504 | 100.0% | 2260.93 | 2261.4526 | 1   | 9.217  | 60.5% | 1 |
| *                                                                         | <a href="#">SmEgg103.03905.03905.2</a> | 4.817  | 0.485  | 100.0% | 2002.54 | 2003.2134 | 1   | 9.591  | 55.6% | 1 |
| *                                                                         | <a href="#">SmEgg204.02781.02781.2</a> | 3.3077 | 0.3242 | 99.8%  | 1884.31 | 1885.0497 | 1   | 6.424  | 63.3% | 1 |
| *                                                                         | <a href="#">SmEgg205.03889.03889.2</a> | 4.8781 | 0.3391 | 100.0% | 2172.23 | 2172.4883 | 1   | 6.963  | 61.1% | 1 |
| *                                                                         | <a href="#">SmEgg203.03503.03503.2</a> | 3.2041 | 0.1866 | 99.1%  | 2627.79 | 2628.0095 | 3   | 5.073  | 32.6% | 1 |

| similar to UP Q2SAC2_HAHCH (Q2SAC2)<br>Enoyl-CoA hydratase/carnithine racemase, partial (6%) |                                        |        |        |       |         |           |     |        |       |   |
|----------------------------------------------------------------------------------------------|----------------------------------------|--------|--------|-------|---------|-----------|-----|--------|-------|---|
|                                                                                              | Filename                               | XCorr  | DeltCN | Conf% | ObsM+H+ | CalcM+H+  | SpR | ZScore | Ion%  | # |
| *                                                                                            | <a href="#">SmEgg405.04730.04730.2</a> | 3.4402 | 0.2182 | 99.8% | 2057.4  | 2057.2207 | 1   | 5.22   | 53.1% | 4 |
| *                                                                                            | <a href="#">SmEgg204.00464.00464.2</a> | 3.2621 | 0.2498 | 99.8% | 1588.49 | 1587.7258 | 2   | 5.409  | 58.3% | 5 |

| homologue to UP Q5DB55_SCHJA (Q5DB55)<br>SJCHGC00821 protein, complete |                                        |        |        |       |         |          |     |        |       |   |
|------------------------------------------------------------------------|----------------------------------------|--------|--------|-------|---------|----------|-----|--------|-------|---|
|                                                                        | Filename                               | XCorr  | DeltCN | Conf% | ObsM+H+ | CalcM+H+ | SpR | ZScore | Ion%  | # |
|                                                                        | <a href="#">SmEgg304.03978.03978.2</a> | 3.5361 | 0.148  | 99.5% | 2473.5  | 2472.729 | 2   | 4.261  | 40.0% | 1 |
| *                                                                      | <a href="#">SmEgg205.04606.04606.2</a> | 3.0126 | 0.2119 | 99.0% | 2532.18 | 2530.913 | 1   | 4.959  | 38.1% | 1 |

| similar to UP Q5DHK5_SCHJA (Q5DHK5)<br>SJCHGC05629 protein, partial (92%) |                                        |        |        |        |         |           |     |        |       |   |
|---------------------------------------------------------------------------|----------------------------------------|--------|--------|--------|---------|-----------|-----|--------|-------|---|
|                                                                           | Filename                               | XCorr  | DeltCN | Conf%  | ObsM+H+ | CalcM+H+  | SpR | ZScore | Ion%  | # |
| *                                                                         | <a href="#">SmEgg203.03634.03634.2</a> | 4.1969 | 0.2701 | 99.9%  | 2070.21 | 2071.294  | 1   | 5.75   | 55.6% | 1 |
| *                                                                         | <a href="#">SmEgg203.04370.04370.2</a> | 4.5149 | 0.3517 | 100.0% | 1829.64 | 1830.0911 | 1   | 7.215  | 65.6% | 1 |

| <a href="#">CD078446 2 33-171</a> | 3                                      | 3      | <a href="#">20.9%</a> | 139   | 16124   | 9.1       | no description                                                                |        |       |   |
|-----------------------------------|----------------------------------------|--------|-----------------------|-------|---------|-----------|-------------------------------------------------------------------------------|--------|-------|---|
| <a href="#">TC21792 3 19-158</a>  | 3                                      | 3      | <a href="#">20.7%</a> | 140   | 16237   | 9.1       | homologue to UP Q86DY6_SCHJA (Q86DY6)<br>Clone ZZZ416 mRNA sequence, complete |        |       |   |
| <a href="#">TC20432 1 47-183</a>  | 3                                      | 3      | <a href="#">21.2%</a> | 137   | 15733   | 8.1       | homologue to UP Q86DY6_SCHJA (Q86DY6)<br>Clone ZZZ416 mRNA sequence, complete |        |       |   |
|                                   | Filename                               | XCorr  | DeltCN                | Conf% | ObsM+H+ | CalcM+H+  | SpR                                                                           | ZScore | Ion%  | # |
|                                   | <a href="#">SmEgg102.01248.01248.1</a> | 1.8015 | 0.2376                | 96.7% | 722.51  | 722.7758  | 97                                                                            | 4.98   | 64.3% | 1 |
|                                   | <a href="#">SmEgg303.02245.02245.2</a> | 3.291  | 0.1579                | 99.5% | 1748.39 | 1747.8613 | 1                                                                             | 4.727  | 62.5% | 1 |
|                                   | <a href="#">SmEgg105.02074.02074.2</a> | 3.4183 | 0.0519                | 99.0% | 1264.69 | 1265.4551 | 1                                                                             | 3.606  | 83.3% | 1 |

| homologue to UP Q8MXA4_SCHMA<br>(Q8MXA4) Heat shock protein HSP60 |          |       |                       |       |         |          |     |        |      |   |
|-------------------------------------------------------------------|----------|-------|-----------------------|-------|---------|----------|-----|--------|------|---|
|                                                                   | Filename | XCorr | DeltCN                | Conf% | ObsM+H+ | CalcM+H+ | SpR | ZScore | Ion% | # |
| <a href="#">TC29704 2 11-577</a>                                  | 7        | 11    | <a href="#">20.3%</a> | 567   | 60623   | 6.2      |     |        |      |   |

|                                                      |                                        |        |        |              |         |           |     |                                                                                         |       | (Fragment), complete |  |  |  |
|------------------------------------------------------|----------------------------------------|--------|--------|--------------|---------|-----------|-----|-----------------------------------------------------------------------------------------|-------|----------------------|--|--|--|
|                                                      | Filename                               | XCorr  | DeltCN | Conf%        | ObsM+H+ | CalcM+H+  | SpR | ZScore                                                                                  | Ion%  |                      |  |  |  |
|                                                      | <a href="#">SmEgg202.02192.02192.2</a> | 5.4862 | 0.491  | 100.0%       | 2560.92 | 2561.7222 | 1   | 9.696                                                                                   | 47.9% |                      |  |  |  |
| *                                                    | <a href="#">SmEgg103.03090.03090.1</a> | 2.4045 | 0.2615 | 100.0%       | 1103.59 | 1104.3502 | 1   | 5.193                                                                                   | 70.0% |                      |  |  |  |
| *                                                    | <a href="#">SmEgg103.02799.02799.1</a> | 2.564  | 0.2139 | 99.2%        | 1432.53 | 1432.6158 | 32  | 5.741                                                                                   | 45.5% |                      |  |  |  |
| *                                                    | <a href="#">SmEgg204.03808.03808.2</a> | 4.2975 | 0.2722 | 100.0%       | 1621.76 | 1620.765  | 1   | 6.505                                                                                   | 75.0% |                      |  |  |  |
|                                                      | <a href="#">SmEgg206.02416.02416.2</a> | 2.8662 | 0.1389 | 97.1%        | 1450.4  | 1450.6874 | 1   | 4.409                                                                                   | 77.3% |                      |  |  |  |
|                                                      | <a href="#">SmEgg203.02896.02896.2</a> | 3.1961 | 0.1906 | 99.1%        | 1624.56 | 1624.8778 | 1   | 5.023                                                                                   | 59.4% |                      |  |  |  |
|                                                      | <a href="#">SmEgg104.00492.00492.2</a> | 3.3922 | 0.2548 | 99.8%        | 2456.85 | 2457.8242 | 1   | 5.746                                                                                   | 31.2% |                      |  |  |  |
| U                                                    | <b>TC29454 3 1-230</b>                 | 3      | 11     | <u>20.0%</u> | 230     | 25708     | 7.7 | similar to UP Q640A7_XENTR (Q640A7)<br>Glucose phosphate isomerase, partial (45%)       |       |                      |  |  |  |
|                                                      | Filename                               | XCorr  | DeltCN | Conf%        | ObsM+H+ | CalcM+H+  | SpR | ZScore                                                                                  | Ion%  |                      |  |  |  |
|                                                      | <a href="#">SmEgg202.02321.02321.2</a> | 3.8427 | 0.4124 | 100.0%       | 1693.44 | 1693.8279 | 1   | 7.591                                                                                   | 71.4% |                      |  |  |  |
| *                                                    | <a href="#">SmEgg103.03710.03710.2</a> | 4.3813 | 0.3612 | 100.0%       | 1987.57 | 1988.3092 | 1   | 7.4                                                                                     | 50.0% |                      |  |  |  |
| *                                                    | <a href="#">SmEgg205.02271.02271.2</a> | 3.1116 | 0.1127 | 97.9%        | 1320.79 | 1320.4911 | 2   | 4.219                                                                                   | 63.6% |                      |  |  |  |
| U                                                    | <b>TC30411 1 21-165</b>                | 2      | 5      | <u>20.0%</u> | 145     | 15898     | 6.1 | similar to UP Q5DFR6_SCHJA (Q5DFR6)<br>SJCHGC09559 protein, partial (84%)               |       |                      |  |  |  |
|                                                      | Filename                               | XCorr  | DeltCN | Conf%        | ObsM+H+ | CalcM+H+  | SpR | ZScore                                                                                  | Ion%  |                      |  |  |  |
| *                                                    | <a href="#">SmEgg102.02427.02427.2</a> | 3.4571 | 0.381  | 99.9%        | 1633.32 | 1633.8103 | 1   | 7.099                                                                                   | 65.4% |                      |  |  |  |
| *                                                    | <a href="#">SmEgg203.04462.04462.2</a> | 4.1029 | 0.4622 | 100.0%       | 1792.64 | 1793.0728 | 1   | 8.218                                                                                   | 75.0% |                      |  |  |  |
| U                                                    | <b>TC25063 2 48-576</b>                | 7      | 21     | <u>19.7%</u> | 529     | 58082     | 5.3 | homologue to UP O45038_SCHJA (O45038)<br>HSP70, partial (82%)                           |       |                      |  |  |  |
|                                                      | Filename                               | XCorr  | DeltCN | Conf%        | ObsM+H+ | CalcM+H+  | SpR | ZScore                                                                                  | Ion%  |                      |  |  |  |
|                                                      | <a href="#">SmEgg202.03711.03711.2</a> | 3.4638 | 0.3931 | 99.9%        | 1492.51 | 1493.7583 | 1   | 6.793                                                                                   | 73.1% |                      |  |  |  |
|                                                      | <a href="#">SmEgg105.02597.02597.2</a> | 4.2177 | 0.3726 | 100.0%       | 1888.71 | 1889.121  | 1   | 6.955                                                                                   | 68.8% |                      |  |  |  |
|                                                      | <a href="#">SmEgg202.02872.02872.2</a> | 5.1894 | 0.324  | 100.0%       | 1660.73 | 1660.9078 | 1   | 7.783                                                                                   | 83.3% |                      |  |  |  |
| 2                                                    | <a href="#">SmEgg102.02809.02809.1</a> | 3.3635 | 0.4454 | 100.0%       | 1190.35 | 1191.3696 | 1   | 7.67                                                                                    | 68.2% |                      |  |  |  |
|                                                      | <a href="#">SmEgg103.03275.03275.2</a> | 3.3305 | 0.2848 | 99.8%        | 2538.87 | 2539.7612 | 2   | 5.954                                                                                   | 34.1% |                      |  |  |  |
|                                                      | <a href="#">SmEgg202.03383.03383.2</a> | 5.0441 | 0.3866 | 100.0%       | 2321.88 | 2319.5273 | 1   | 6.808                                                                                   | 52.5% |                      |  |  |  |
|                                                      | <a href="#">SmEgg102.04296.04296.1</a> | 2.5817 | 0.145  | 95.3%        | 1479.77 | 1479.5865 | 5   | 4.224                                                                                   | 50.0% |                      |  |  |  |
| Similarities: <a href="#">TC33074 3 277-926(2:5)</a> |                                        |        |        |              |         |           |     |                                                                                         |       |                      |  |  |  |
| <a href="#">TC26985 2 10-203(1:6)</a>                |                                        |        |        |              |         |           |     |                                                                                         |       |                      |  |  |  |
| U                                                    | <b>TC20476 1 113-353</b>               | 3      | 4      | <u>18.8%</u> | 341     | 38149     | 6.7 | similar to UP Q86DV3_SCHJA (Q86DV3) Clone<br>ZZZ79 mRNA sequence, complete              |       |                      |  |  |  |
|                                                      | Filename                               | XCorr  | DeltCN | Conf%        | ObsM+H+ | CalcM+H+  | SpR | ZScore                                                                                  | Ion%  |                      |  |  |  |
| *                                                    | <a href="#">SmEgg203.03395.03395.2</a> | 3.8198 | 0.379  | 100.0%       | 2157.39 | 2157.424  | 1   | 7.053                                                                                   | 39.5% |                      |  |  |  |
|                                                      | <a href="#">SmEgg206.03666.03666.2</a> | 4.2652 | 0.3854 | 100.0%       | 2274.56 | 2275.5916 | 1   | 6.275                                                                                   | 57.5% |                      |  |  |  |
| *                                                    | <a href="#">SmEgg202.04299.04299.2</a> | 5.1418 | 0.2789 | 100.0%       | 2625.68 | 2626.7058 | 1   | 7.018                                                                                   | 56.8% |                      |  |  |  |
| U                                                    | <b>TC23044 3 1-862</b>                 | 11     | 21     | <u>18.7%</u> | 862     | 96117     | 5.7 | similar to UP Q5BYY5_SCHJA (Q5BYY5)<br>SJCHGC06130 protein (Fragment), partial<br>(91%) |       |                      |  |  |  |
|                                                      | Filename                               | XCorr  | DeltCN | Conf%        | ObsM+H+ | CalcM+H+  | SpR | ZScore                                                                                  | Ion%  |                      |  |  |  |
| *                                                    | <a href="#">SmEgg204.03412.03412.2</a> | 3.9301 | 0.2927 | 99.9%        | 1928.64 | 1929.201  | 1   | 5.808                                                                                   | 60.0% |                      |  |  |  |
| *                                                    | <a href="#">SmEgg105.03366.03366.2</a> | 3.892  | 0.2968 | 99.9%        | 1729.64 | 1730.0753 | 1   | 6.643                                                                                   | 67.9% |                      |  |  |  |
|                                                      | <a href="#">SmEgg202.03159.03159.2</a> | 4.3127 | 0.3897 | 100.0%       | 2150.55 | 2150.322  | 1   | 6.831                                                                                   | 52.6% |                      |  |  |  |
|                                                      | <a href="#">SmEgg103.02803.02803.2</a> | 2.974  | 0.2143 | 99.1%        | 1769.05 | 1769.872  | 4   | 4.58                                                                                    | 53.8% |                      |  |  |  |
|                                                      | <a href="#">SmEgg303.03764.03764.2</a> | 3.6296 | 0.3409 | 99.9%        | 1660.51 | 1659.7559 | 1   | 6.673                                                                                   | 79.2% |                      |  |  |  |
| *                                                    | <a href="#">SmEgg104.02556.02556.2</a> | 4.2142 | 0.3163 | 100.0%       | 1528.8  | 1528.6802 | 1   | 6.021                                                                                   | 65.4% |                      |  |  |  |
| *                                                    | <a href="#">SmEgg103.04357.04357.2</a> | 4.234  | 0.4511 | 100.0%       | 2740.78 | 2742.0205 | 1   | 7.06                                                                                    | 47.7% |                      |  |  |  |
| *                                                    | <a href="#">SmEgg203.02667.02667.2</a> | 3.0207 | 0.1471 | 97.0%        | 2051.25 | 2051.3066 | 26  | 4.309                                                                                   | 38.2% |                      |  |  |  |
| *                                                    | <a href="#">SmEgg205.03218.03218.2</a> | 4.9578 | 0.3242 | 100.0%       | 2355.04 | 2352.6238 | 1   | 7.182                                                                                   | 57.9% |                      |  |  |  |

|                                                      |                                        |              |               |                       |                |                 |            |                                                                              |             |          |
|------------------------------------------------------|----------------------------------------|--------------|---------------|-----------------------|----------------|-----------------|------------|------------------------------------------------------------------------------|-------------|----------|
| *                                                    | <a href="#">SmEgg202.03328.03328.2</a> | 3.8784       | 0.2412        | 99.8%                 | 2021.55        | 2021.2006       | 1          | 5.25                                                                         | 56.2%       |          |
| *                                                    | <a href="#">SmEgg203.03455.03455.2</a> | 3.0876       | 0.2858        | 99.7%                 | 2420.2         | 2419.6628       | 3          | 5.831                                                                        | 36.8%       |          |
| <a href="#">U</a>                                    | <b>TC28526 2 20-286</b>                | 3            | 6             | <a href="#">18.7%</a> | 267            | 31000           | 6.9        | similar to UP Q5D8G6_SCHJA (Q5D8G6) SJCHGC09416 protein, partial (51%)       |             |          |
|                                                      | <b>Filename</b>                        | <b>XCorr</b> | <b>DeltCN</b> | <b>Conf%</b>          | <b>ObsM+H+</b> | <b>CalcM+H+</b> | <b>SpR</b> | <b>ZScore</b>                                                                | <b>Ion%</b> | <b>#</b> |
| *                                                    | <a href="#">SmEgg104.03603.03603.2</a> | 3.1253       | 0.2017        | 99.1%                 | 2624.9         | 2624.9624       | 1          | 4.914                                                                        | 34.1%       | 3        |
| *                                                    | <a href="#">SmEgg304.01779.01779.2</a> | 3.2113       | 0.2189        | 99.7%                 | 1421.08        | 1421.5529       | 2          | 4.846                                                                        | 72.7%       | 1        |
| *                                                    | <a href="#">SmEgg106.02365.02365.2</a> | 3.8873       | 0.3367        | 99.9%                 | 1797.7         | 1798.005        | 1          | 6.251                                                                        | 64.3%       | 2        |
| <a href="#">U</a>                                    | <b>TC28308 2 1-355</b>                 | 3            | 6             | <a href="#">18.6%</a> | 355            | 40427           | 5.9        | Schistosoma mansoni egg antigen mRNA fragment                                |             |          |
|                                                      | <b>Filename</b>                        | <b>XCorr</b> | <b>DeltCN</b> | <b>Conf%</b>          | <b>ObsM+H+</b> | <b>CalcM+H+</b> | <b>SpR</b> | <b>ZScore</b>                                                                | <b>Ion%</b> | <b>#</b> |
| *                                                    | <a href="#">SmEgg203.02850.02850.2</a> | 4.5842       | 0.3654        | 100.0%                | 1676.54        | 1676.8235       | 1          | 7.355                                                                        | 75.0%       | :        |
| *                                                    | <a href="#">SmEgg203.02378.02378.2</a> | 3.7803       | 0.2595        | 99.8%                 | 2021.71        | 2021.201        | 2          | 5.574                                                                        | 44.1%       | :        |
| *                                                    | <a href="#">SmEgg106.03658.03658.3</a> | 4.7244       | 0.3454        | 100.0%                | 3686.1         | 3687.2397       | 1          | 6.199                                                                        | 25.8%       | :        |
| <a href="#">U</a>                                    | <b>TC32172 1 28-145</b>                | 2            | 2             | <a href="#">18.6%</a> | 118            | 12423           | 4.7        | similar to UP Q5DBM5_SCHJA (Q5DBM5) SJCHGC01207 protein, partial (98%)       |             |          |
|                                                      | <b>Filename</b>                        | <b>XCorr</b> | <b>DeltCN</b> | <b>Conf%</b>          | <b>ObsM+H+</b> | <b>CalcM+H+</b> | <b>SpR</b> | <b>ZScore</b>                                                                | <b>Ion%</b> | <b>#</b> |
| *                                                    | <a href="#">SmEgg206.03075.03075.2</a> | 4.6163       | 0.3974        | 100.0%                | 1454.5         | 1454.7185       | 1          | 6.814                                                                        | 79.2%       | :        |
| *                                                    | <a href="#">SmEgg105.03486.03486.2</a> | 2.4862       | 0.2483        | 96.7%                 | 2481.95        | 2482.8022       | 2          | 5.111                                                                        | 33.3%       | :        |
| <a href="#">U</a>                                    | <b>TC26761 3 1-168</b>                 | 2            | 3             | <a href="#">18.5%</a> | 168            | 20151           | 8.2        | similar to UP Q5DBX4_SCHJA (Q5DBX4) SJCHGC01267 protein, complete            |             |          |
|                                                      | <b>Filename</b>                        | <b>XCorr</b> | <b>DeltCN</b> | <b>Conf%</b>          | <b>ObsM+H+</b> | <b>CalcM+H+</b> | <b>SpR</b> | <b>ZScore</b>                                                                | <b>Ion%</b> | <b>#</b> |
| *                                                    | <a href="#">SmEgg102.03977.03977.2</a> | 3.9256       | 0.3278        | 99.9%                 | 2111.73        | 2112.3125       | 1          | 6.29                                                                         | 59.4%       | 2        |
| *                                                    | <a href="#">SmEgg206.00074.00074.2</a> | 2.532        | 0.2385        | 97.1%                 | 1794.05        | 1794.9983       | 4          | 5.392                                                                        | 50.0%       | 1        |
| <a href="#">U</a>                                    | <b>TC28990 3 9-159</b>                 | 2            | 2             | <a href="#">18.5%</a> | 151            | 16962           | 9.2        | similar to UP Q3KZB8_SCHJA (Q3KZB8) SJCHGC01660 protein (Fragment), complete |             |          |
|                                                      | <b>Filename</b>                        | <b>XCorr</b> | <b>DeltCN</b> | <b>Conf%</b>          | <b>ObsM+H+</b> | <b>CalcM+H+</b> | <b>SpR</b> | <b>ZScore</b>                                                                | <b>Ion%</b> | <b>#</b> |
| *                                                    | <a href="#">SmEgg202.02358.02358.2</a> | 2.8802       | 0.3101        | 99.8%                 | 1691.55        | 1691.7942       | 1          | 5.293                                                                        | 63.3%       | 1        |
| *                                                    | <a href="#">SmEgg203.02504.02504.2</a> | 3.5781       | 0.2453        | 99.8%                 | 1497.49        | 1497.6909       | 1          | 4.992                                                                        | 81.8%       | 1        |
| <a href="#">U</a>                                    | <b>TC21702 2 33-167</b>                | 4            | 9             | <a href="#">18.5%</a> | 135            | 15465           | 8.2        | no description                                                               |             |          |
|                                                      | <b>Filename</b>                        | <b>XCorr</b> | <b>DeltCN</b> | <b>Conf%</b>          | <b>ObsM+H+</b> | <b>CalcM+H+</b> | <b>SpR</b> | <b>ZScore</b>                                                                | <b>Ion%</b> | <b>#</b> |
| *                                                    | <a href="#">SmEgg302.03398.03398.2</a> | 2.6017       | 0.2664        | 98.2%                 | 2294.45        | 2295.52         | 6          | 4.685                                                                        | 32.5%       | 1        |
| *                                                    | <a href="#">SmEgg306.03166.03166.2</a> | 3.2062       | 0.2069        | 99.5%                 | 2817.05        | 2818.1213       | 39         | 4.664                                                                        | 27.1%       | 4        |
| *                                                    | <a href="#">SmEgg302.03083.03083.2</a> | 2.7774       | 0.2951        | 99.6%                 | 2077.11        | 2077.2646       | 1          | 5.096                                                                        | 41.7%       | 1        |
| *                                                    | <a href="#">SmEgg303.04079.04079.2</a> | 3.4653       | 0.2649        | 99.8%                 | 2598.47        | 2599.866        | 1          | 5.989                                                                        | 38.6%       | 3        |
| <a href="#">U</a>                                    | <b>TC19970 3 1529-1794</b>             | 3            | 17            | <a href="#">18.4%</a> | 266            | 30453           | 5.8        | UP Q9Y1J4_SCHMA (Q9Y1J4) Retinoid X receptor RXR-2, complete                 |             |          |
|                                                      | <b>Filename</b>                        | <b>XCorr</b> | <b>DeltCN</b> | <b>Conf%</b>          | <b>ObsM+H+</b> | <b>CalcM+H+</b> | <b>SpR</b> | <b>ZScore</b>                                                                | <b>Ion%</b> | <b>#</b> |
| *                                                    | <a href="#">SmEgg105.00239.00239.2</a> | 4.6858       | 0.323         | 100.0%                | 2374.81        | 2374.6663       | 1          | 6.628                                                                        | 55.3%       |          |
| *                                                    | <a href="#">SmEgg202.03961.03961.2</a> | 6.0938       | 0.0855        | 99.9%                 | 2088.42        | 2089.2605       | 1          | 8.363                                                                        | 72.2%       |          |
| *2                                                   | <a href="#">SmEgg103.03729.03729.2</a> | 3.9306       | 0.0448        | 99.8%                 | 1190.3         | 1190.4436       | 1          | 3.656                                                                        | 88.9%       |          |
| Similarities: <a href="#">TC19827 3 12-261</a> (1:2) |                                        |              |               |                       |                |                 |            |                                                                              |             |          |
| <a href="#">TC30162 3 15-252</a> (1:2)               |                                        |              |               |                       |                |                 |            |                                                                              |             |          |
| <a href="#">TC22539 2 57-333</a> (1:2)               |                                        |              |               |                       |                |                 |            |                                                                              |             |          |
| <a href="#">U</a>                                    | <b>TC23220 2 1-244</b>                 | 4            | 8             | <a href="#">18.4%</a> | 244            | 27831           | 9.1        | similar to UP Q5DEG0_SCHJA (Q5DEG0) SJCHGC05461 protein, partial (72%)       |             |          |
|                                                      | <b>Filename</b>                        | <b>XCorr</b> | <b>DeltCN</b> | <b>Conf%</b>          | <b>ObsM+H+</b> | <b>CalcM+H+</b> | <b>SpR</b> | <b>ZScore</b>                                                                | <b>Ion%</b> | <b>#</b> |
| *                                                    | <a href="#">SmEgg305.03483.03483.2</a> | 2.8431       | 0.2491        | 99.1%                 | 2666.3         | 2667.9756       | 2          | 4.698                                                                        | 28.3%       | :        |
| *                                                    | <a href="#">SmEgg105.02762.02762.2</a> | 3.1362       | 0.3144        | 99.8%                 | 2109.68        | 2108.4058       | 2          | 5.573                                                                        | 44.4%       | :        |

|   |                                        |        |        |        |         |           |   |       |       |   |
|---|----------------------------------------|--------|--------|--------|---------|-----------|---|-------|-------|---|
| * | <a href="#">SmEgg102.02873.02873.2</a> | 3.4877 | 0.3979 | 99.9%  | 1980.62 | 1980.2317 | 1 | 6.754 | 52.9% | : |
| * | <a href="#">SmEgg104.03629.03629.2</a> | 5.9358 | 0.3921 | 100.0% | 1952.81 | 1953.2023 | 1 | 8.116 | 75.0% | : |

[U](#) **CD170785|5|24-137** 2 4 [18.4%](#) 114 12469 4.7  
 homologue to GP|2829291|gb|AAC00520.1|HSP70 {Schistosoma japonicum}, partial (21%)

|   | Filename                               | XCorr  | DeltCN | Conf% | ObsM+H+ | CalcM+H+  | SpR | ZScore | Ion%  | # |
|---|----------------------------------------|--------|--------|-------|---------|-----------|-----|--------|-------|---|
| * | <a href="#">SmEgg202.03497.03497.2</a> | 2.7293 | 0.2695 | 99.0% | 2103.29 | 2101.1907 | 1   | 5.339  | 33.3% | 1 |
| * | <a href="#">SmEgg304.04546.04546.2</a> | 2.9556 | 0.2    | 98.5% | 2363.69 | 2361.5266 | 1   | 4.569  | 40.0% | 3 |

[U](#) **TC19984|2|1-210** 3 6 [18.1%](#) 210 22855 8.5  
 weakly similar to UP|Q4SCV7\_TETNG (Q4SCV7) Chromosome 14 SCAF14647, whole genome shotgun sequence. (Fragment), partial (30%)

|   | Filename                               | XCorr  | DeltCN | Conf%  | ObsM+H+ | CalcM+H+  | SpR | ZScore | Ion%  | # |
|---|----------------------------------------|--------|--------|--------|---------|-----------|-----|--------|-------|---|
| * | <a href="#">SmEgg204.03502.03502.2</a> | 4.2286 | 0.4244 | 100.0% | 2067.66 | 2068.2932 | 1   | 7.473  | 52.9% | : |
| * | <a href="#">SmEgg205.04030.04030.2</a> | 3.7303 | 0.2601 | 99.8%  | 2188.3  | 2188.5378 | 1   | 6.618  | 47.4% | : |
| * | <a href="#">SmEgg204.04208.04208.2</a> | 2.73   | 0.2739 | 99.1%  | 2129.99 | 2131.4858 | 6   | 5.054  | 38.9% | : |

[U](#) **TC22867|2|16-261** 2 6 [17.9%](#) 246 28030 5.3  
 similar to UP|Q86DY0\_SCHJA (Q86DY0) Clone ZZZ445 mRNA sequence, complete

|   | Filename                               | XCorr  | DeltCN | Conf%  | ObsM+H+ | CalcM+H+  | SpR | ZScore | Ion%  | # |
|---|----------------------------------------|--------|--------|--------|---------|-----------|-----|--------|-------|---|
| * | <a href="#">SmEgg104.04606.04606.2</a> | 4.3112 | 0.2397 | 99.9%  | 2240.37 | 2238.5525 | 1   | 6.774  | 50.0% | : |
|   | <a href="#">SmEgg102.03393.03393.2</a> | 4.867  | 0.3629 | 100.0% | 2673.24 | 2672.831  | 1   | 7.747  | 47.9% | : |

[U](#) **TC35744|3|20-132** 3 5 [17.7%](#) 113 13795 5.3  
 similar to UP|Q5D947\_SCHJA (Q5D947) SJCHGC00820 protein, partial (24%)

|  | Filename                               | XCorr  | DeltCN | Conf% | ObsM+H+ | CalcM+H+  | SpR | ZScore | Ion%  | # |
|--|----------------------------------------|--------|--------|-------|---------|-----------|-----|--------|-------|---|
|  | <a href="#">SmEgg105.02409.02409.2</a> | 2.9187 | 0.279  | 99.8% | 1206.21 | 1206.3867 | 2   | 5.535  | 72.2% | 2 |
|  | <a href="#">SmEgg304.03082.03082.2</a> | 3.3004 | 0.1283 | 99.7% | 1182.32 | 1182.405  | 1   | 4.834  | 77.8% | 2 |
|  | <a href="#">SmEgg202.01686.01686.1</a> | 2.5044 | 0.1597 | 96.6% | 1153.44 | 1154.2188 | 5   | 3.9    | 68.8% | 1 |

Similarities: [TC28616|3|1-181\(1:2\)](#)

[TC28591|3|156-620\(1:2\)](#)

[U](#) **TC24951|2|1-183** 2 3 [17.5%](#) 183 20196 9.0  
 homologue to UP|Q5D9C5\_SCHJA (Q5D9C5) SJCHGC09453 protein, partial (30%)

|  | Filename                               | XCorr  | DeltCN | Conf% | ObsM+H+ | CalcM+H+  | SpR | ZScore | Ion%  | # |
|--|----------------------------------------|--------|--------|-------|---------|-----------|-----|--------|-------|---|
|  | <a href="#">SmEgg202.04560.04560.2</a> | 2.7254 | 0.3031 | 99.6% | 1923.91 | 1925.1548 | 1   | 5.169  | 50.0% | 2 |
|  | <a href="#">SmEgg304.03514.03514.2</a> | 2.6082 | 0.1918 | 95.2% | 1713.69 | 1714.0146 | 7   | 4.769  | 57.1% | 1 |

[U](#) **TC26321|1|1-143** 5 12 [16.8%](#) 143 16224 11.0  
 UP|Q5DHF8\_SCHJA (Q5DHF8) SJCHGC01198 protein, complete

[U](#) **TC34174|2|171-313** 5 12 [16.8%](#) 143 16135 11.3  
 UP|Q5DHF8\_SCHJA (Q5DHF8) SJCHGC01198 protein, complete

[U](#) **TC33588|1|2-145** 5 12 [16.7%](#) 144 16161 11.3  
 UP|Q6WV78\_MYTTR (Q6WV78) Histone H3, complete

[U](#) **TC29336|3|1-143** 5 12 [16.8%](#) 143 16076 11.0  
 homologue to UP|Q8CGN9\_MOUSE (Q8CGN9) Histone protein Hist2h3c1 (H3 histone, family 2), partial (80%)

|  | Filename                               | XCorr  | DeltCN | Conf%  | ObsM+H+ | CalcM+H+  | SpR | ZScore | Ion%  | # |
|--|----------------------------------------|--------|--------|--------|---------|-----------|-----|--------|-------|---|
|  | <a href="#">SmEgg203.04134.04134.2</a> | 3.8579 | 0.3255 | 99.9%  | 2693.06 | 2693.9795 | 1   | 6.293  | 43.5% | 4 |
|  | <a href="#">SmEgg104.02891.02891.2</a> | 4.2085 | 0.4141 | 100.0% | 1801.32 | 1802.0466 | 1   | 7.21   | 56.7% | 3 |
|  | <a href="#">SmEgg302.02336.02336.2</a> | 3.6343 | 0.2079 | 99.8%  | 1332.71 | 1333.4498 | 2   | 5.256  | 80.0% | 1 |
|  | <a href="#">SmEgg203.02343.02343.2</a> | 4.5667 | 0.4117 | 100.0% | 1531.97 | 1532.7026 | 1   | 7.588  | 75.0% | 2 |
|  | <a href="#">SmEgg103.02279.02279.1</a> | 2.8506 | 0.2566 | 100.0% | 1532.59 | 1532.7026 | 1   | 6.039  | 54.2% | 2 |

[U](#) **TC21929|1|1-215** 4 6 [16.7%](#) 215 23835 6.7  
 homologue to UP|Q5DCH6\_SCHJA (Q5DCH6) SJCHGC06054 protein, partial (95%)

|   | Filename                               | XCorr  | DeltCN | Conf%  | ObsM+H+ | CalcM+H+  | SpR | ZScore | Ion%  | # |
|---|----------------------------------------|--------|--------|--------|---------|-----------|-----|--------|-------|---|
| * | <a href="#">SmEgg302.03255.03255.2</a> | 2.8198 | 0.1957 | 97.4%  | 2214.12 | 2214.4436 | 4   | 5.073  | 37.5% | 1 |
| * | <a href="#">SmEgg303.04017.04017.2</a> | 3.7874 | 0.3456 | 99.9%  | 2498.76 | 2499.7896 | 1   | 6.618  | 36.4% | 1 |
| * | <a href="#">SmEgg303.04029.04029.2</a> | 2.6685 | 0.2039 | 96.4%  | 2236.88 | 2238.5457 | 4   | 4.584  | 32.5% | 1 |
| * | <a href="#">SmEgg104.04077.04077.2</a> | 4.5162 | 0.3383 | 100.0% | 1530.59 | 1531.7515 | 1   | 6.029  | 83.3% | 1 |

[U](#) **TC20786|3|6-733** 8 13 [16.5%](#) 728 81579 7.8 UP|SMC7\_SCHMA (P16641) ATP:guanidino kinase SMC74 (ATP:guanidino phosphotransferase) , partial (96%)

|   | Filename                               | XCorr  | DeltCN | Conf%  | ObsM+H+ | CalcM+H+  | SpR | ZScore | Ion%  | # |
|---|----------------------------------------|--------|--------|--------|---------|-----------|-----|--------|-------|---|
| * | <a href="#">SmEgg105.03202.03202.2</a> | 3.7951 | 0.3326 | 99.9%  | 2488.99 | 2489.757  | 1   | 6.756  | 43.5% | 1 |
| * | <a href="#">SmEgg205.02831.02831.2</a> | 2.6388 | 0.1487 | 97.7%  | 1161.27 | 1161.3488 | 1   | 4.037  | 87.5% | 1 |
| * | <a href="#">SmEgg204.02400.02400.2</a> | 3.2965 | 0.0456 | 97.5%  | 1244.31 | 1244.4337 | 3   | 3.619  | 75.0% | 1 |
| * | <a href="#">SmEgg205.03617.03617.2</a> | 3.6713 | 0.3165 | 99.9%  | 1797.6  | 1798.0582 | 1   | 6.024  | 60.0% | 1 |
| * | <a href="#">SmEgg103.03265.03265.2</a> | 3.2746 | 0.2934 | 99.8%  | 1773.89 | 1773.0973 | 1   | 5.702  | 56.2% | 1 |
| * | <a href="#">SmEgg203.04475.04475.2</a> | 3.9361 | 0.3949 | 100.0% | 2966.62 | 2968.1753 | 1   | 7.364  | 41.7% | 1 |
| * | <a href="#">SmEgg103.04325.04325.3</a> | 4.5727 | 0.3684 | 100.0% | 2967.31 | 2968.1753 | 1   | 6.194  | 33.3% | 1 |
|   | <a href="#">SmEgg103.02822.02822.2</a> | 3.608  | 0.3759 | 99.9%  | 1868.59 | 1869.1431 | 1   | 6.424  | 47.1% | 1 |

[U](#) **TC20141|3|14-436** 4 6 [16.5%](#) 423 46521 6.2 UP|P91802\_SCHMA (P91802) Aspartic proteinase (Fragment), complete

|   | Filename                               | XCorr  | DeltCN | Conf%  | ObsM+H+ | CalcM+H+  | SpR | ZScore | Ion%  | # |
|---|----------------------------------------|--------|--------|--------|---------|-----------|-----|--------|-------|---|
| * | <a href="#">SmEgg206.02967.02967.2</a> | 4.3135 | 0.4664 | 100.0% | 1718.35 | 1718.8818 | 1   | 6.834  | 75.0% | 1 |
| * | <a href="#">SmEgg103.03059.03059.2</a> | 4.4341 | 0.4879 | 100.0% | 2009.69 | 2010.3154 | 1   | 8.546  | 52.8% | 1 |
| * | <a href="#">SmEgg106.03066.03066.2</a> | 3.6102 | 0.2902 | 99.8%  | 2777.93 | 2778.1438 | 1   | 5.446  | 34.0% | 1 |
|   | <a href="#">SmEgg202.03048.03048.1</a> | 2.1732 | 0.1901 | 96.1%  | 1394.73 | 1395.6538 | 35  | 4.223  | 59.1% | 1 |

[U](#) **TC23232|2|9-88** 2 3 [16.2%](#) 80 8715 8.4 homologue to UP|GLO2\_SCHMA (Q26547) Probable hydroxyacylglutathione hydrolase (Glyoxalase II) (Glx II) , complete

[U](#) **TC29728|1|21-172** 2 3 [8.6%](#) 152 16467 6.2 similar to UP|Q86DW6\_SCHJA (Q86DW6) Clone ZZZ476 mRNA sequence, partial (67%)

|  | Filename                               | XCorr | DeltCN | Conf% | ObsM+H+ | CalcM+H+  | SpR | ZScore | Ion%  | # |
|--|----------------------------------------|-------|--------|-------|---------|-----------|-----|--------|-------|---|
|  | <a href="#">SmEgg204.02053.02053.1</a> | 2.452 | 0.2334 | 99.5% | 1347.61 | 1348.4985 | 1   | 5.721  | 41.7% | 1 |
|  | <a href="#">SmEgg204.02054.02054.2</a> | 3.441 | 0.3294 | 99.9% | 1349.45 | 1348.4985 | 1   | 6.665  | 83.3% | 2 |

[U](#) **TC21059|3|19-256** 2 6 [16.0%](#) 238 27166 5.1 similar to UP|Q5DC00\_SCHJA (Q5DC00) SJCHGC09074 protein, partial (68%)

|   | Filename                               | XCorr  | DeltCN | Conf% | ObsM+H+ | CalcM+H+  | SpR | ZScore | Ion%  | # |
|---|----------------------------------------|--------|--------|-------|---------|-----------|-----|--------|-------|---|
|   | <a href="#">SmEgg103.02906.02906.2</a> | 2.8799 | 0.1714 | 96.9% | 1845.29 | 1846.1309 | 1   | 4.692  | 50.0% | 1 |
| * | <a href="#">SmEgg103.04746.04746.2</a> | 3.1391 | 0.305  | 99.8% | 2499.62 | 2498.7554 | 1   | 5.619  | 40.0% | 5 |

[U](#) **TC20354|3|204-425** 3 3 [15.8%](#) 222 25254 8.1 UP|Q9GNF6\_SCHMA (Q9GNF6) Thioredoxin peroxidase 3, complete

|   | Filename                               | XCorr  | DeltCN | Conf%  | ObsM+H+ | CalcM+H+  | SpR | ZScore | Ion%  | # |
|---|----------------------------------------|--------|--------|--------|---------|-----------|-----|--------|-------|---|
| * | <a href="#">SmEgg306.02087.02087.2</a> | 2.8637 | 0.2591 | 99.5%  | 1527.02 | 1527.6458 | 3   | 5.253  | 53.8% | 1 |
|   | <a href="#">SmEgg103.02302.02302.1</a> | 2.6085 | 0.2602 | 100.0% | 1110.58 | 1111.283  | 2   | 4.741  | 68.8% | 1 |
|   | <a href="#">SmEgg102.02258.02258.2</a> | 2.9001 | 0.2894 | 99.8%  | 1450.29 | 1450.5566 | 1   | 5.421  | 63.6% | 1 |

[U](#) **TC25928|1|15-226** 2 2 [15.6%](#) 212 23855 5.9 similar to UP|Q5D8I3\_SCHJA (Q5D8I3) SJCHGC06636 protein, complete

|   | Filename                               | XCorr  | DeltCN | Conf%  | ObsM+H+ | CalcM+H+  | SpR | ZScore | Ion%  | # |
|---|----------------------------------------|--------|--------|--------|---------|-----------|-----|--------|-------|---|
| * | <a href="#">SmEgg105.02841.02841.2</a> | 3.2654 | 0.2954 | 99.8%  | 1468.2  | 1468.6958 | 1   | 6.071  | 66.7% | 1 |
| * | <a href="#">SmEgg102.02795.02795.2</a> | 4.3044 | 0.3788 | 100.0% | 2310.11 | 2311.4766 | 1   | 6.701  | 57.9% | 1 |

[U](#) **TC29504|3|27-415** 4 13 [15.2%](#) 389 44432 5.3 homologue to UP|Q5DI18\_SCHJA (Q5DI18) SJCHGC02266 protein, complete



|   | Filename                               | XCorr  | DeltCN | Conf%  | ObsM+H+ | CalcM+H+  | SpR | ZScore | Ion%  | # |
|---|----------------------------------------|--------|--------|--------|---------|-----------|-----|--------|-------|---|
| * | <a href="#">SmEgg206.03506.03506.2</a> | 2.925  | 0.1499 | 96.4%  | 2672.77 | 2674.0198 | 2   | 4.393  | 32.6% | 1 |
| * | <a href="#">SmEgg303.04368.04368.2</a> | 3.2238 | 0.2481 | 99.8%  | 2247.8  | 2247.4631 | 1   | 5.034  | 50.0% | 1 |
| * | <a href="#">SmEgg202.04675.04675.2</a> | 4.3228 | 0.3722 | 100.0% | 2379.78 | 2380.7002 | 1   | 6.711  | 50.0% | 1 |
| * | <a href="#">SmEgg206.02811.02811.2</a> | 4.302  | 0.3352 | 100.0% | 1618.21 | 1618.8326 | 1   | 6.106  | 60.7% | 1 |

| U | TC22842 2 20-184                       | 2      | 4      | 15.2%  | 165     | 19612     | 6.6 | no description |       |   |
|---|----------------------------------------|--------|--------|--------|---------|-----------|-----|----------------|-------|---|
|   | Filename                               | XCorr  | DeltCN | Conf%  | ObsM+H+ | CalcM+H+  | SpR | ZScore         | Ion%  | # |
| * | <a href="#">SmEgg206.02142.02142.2</a> | 2.8369 | 0.0754 | 97.8%  | 1011.28 | 1011.1351 | 1   | 4.247          | 92.9% | 1 |
|   | <a href="#">SmEgg206.03646.03646.2</a> | 4.6602 | 0.321  | 100.0% | 2169.05 | 2169.4382 | 1   | 6.908          | 65.6% | 1 |

| U | TC26374 3 37-208                       | 3      | 4      | 15.1% | 172     | 20278     | 8.3 | similar to UP Q5BZH7_SCHJA (Q5BZH7)<br>SJCHGC08025 protein (Fragment), partial<br>(48%) |       |   |
|---|----------------------------------------|--------|--------|-------|---------|-----------|-----|-----------------------------------------------------------------------------------------|-------|---|
|   | Filename                               | XCorr  | DeltCN | Conf% | ObsM+H+ | CalcM+H+  | SpR | ZScore                                                                                  | Ion%  | # |
| * | <a href="#">SmEgg103.04377.04377.2</a> | 3.4676 | 0.3071 | 99.8% | 2956.07 | 2957.2817 | 1   | 6.012                                                                                   | 36.0% | 2 |
| * | <a href="#">SmEgg303.03648.03648.2</a> | 3.5921 | 0.3332 | 99.9% | 1769.53 | 1770.01   | 1   | 6.234                                                                                   | 57.1% | 1 |
| * | <a href="#">SmEgg404.04754.04754.2</a> | 2.8621 | 0.1715 | 96.8% | 1882.34 | 1883.1694 | 2   | 4.672                                                                                   | 50.0% | 1 |

| U | TC25023 1 14-373                       | 3      | 7      | 14.7%  | 360     | 40920     | 9.0 | similar to UP Q5DEU9_SCHJA (Q5DEU9)<br>SJCHGC05914 protein, partial (96%) |       |   |
|---|----------------------------------------|--------|--------|--------|---------|-----------|-----|---------------------------------------------------------------------------|-------|---|
|   | Filename                               | XCorr  | DeltCN | Conf%  | ObsM+H+ | CalcM+H+  | SpR | ZScore                                                                    | Ion%  | # |
|   | <a href="#">SmEgg205.00307.00307.2</a> | 4.5291 | 0.3111 | 100.0% | 2047.84 | 2049.2415 | 1   | 6.417                                                                     | 68.8% | 4 |
| * | <a href="#">SmEgg102.02878.02878.2</a> | 3.5163 | 0.3392 | 99.9%  | 1917.4  | 1917.0796 | 4   | 6.117                                                                     | 44.1% | 1 |
| * | <a href="#">SmEgg202.03395.03395.2</a> | 4.425  | 0.3964 | 100.0% | 1943.61 | 1943.077  | 1   | 6.718                                                                     | 52.9% | 1 |

| U | TC25487 2 10-369                       | 5      | 14     | 14.4%  | 360     | 39481     | 6.1 | UP Q6WVP6_SCHMA (Q6WVP6) Arginase,<br>complete |       |   |
|---|----------------------------------------|--------|--------|--------|---------|-----------|-----|------------------------------------------------|-------|---|
|   | Filename                               | XCorr  | DeltCN | Conf%  | ObsM+H+ | CalcM+H+  | SpR | ZScore                                         | Ion%  | # |
| * | <a href="#">SmEgg103.01350.01350.1</a> | 2.6165 | 0.2599 | 100.0% | 957.53  | 958.05927 | 1   | 5.033                                          | 68.8% | 1 |
| * | <a href="#">SmEgg102.04089.04089.2</a> | 3.2424 | 0.1326 | 97.8%  | 1946.54 | 1947.1516 | 2   | 4.031                                          | 60.0% | 1 |
| * | <a href="#">SmEgg302.03951.03951.2</a> | 3.5569 | 0.238  | 99.8%  | 2204.29 | 2204.407  | 1   | 5.651                                          | 50.0% | 1 |
| * | <a href="#">SmEgg303.04057.04057.2</a> | 3.8804 | 0.2508 | 99.8%  | 2589.93 | 2589.8274 | 1   | 6.173                                          | 45.2% | 1 |
| * | <a href="#">SmEgg103.04341.04341.2</a> | 4.9239 | 0.3627 | 100.0% | 2266.92 | 2267.625  | 1   | 7.079                                          | 57.5% | 1 |

| U | TC20160 1 27-222                       | 3      | 15     | 14.3%  | 196     | 21910     | 6.5 | UP Q9Y0D3_SCHMA (Q9Y0D3) Thioredoxin<br>peroxidase 2, complete |       |   |
|---|----------------------------------------|--------|--------|--------|---------|-----------|-----|----------------------------------------------------------------|-------|---|
| U | TC29747 3 126-332                      | 3      | 15     | 13.5%  | 207     | 23243     | 6.9 | UP Q9Y0D3_SCHMA (Q9Y0D3) Thioredoxin<br>peroxidase 2, complete |       |   |
|   | Filename                               | XCorr  | DeltCN | Conf%  | ObsM+H+ | CalcM+H+  | SpR | ZScore                                                         | Ion%  | # |
| 2 | <a href="#">SmEgg403.00038.00038.1</a> | 2.0915 | 0.3219 | 100.0% | 1559.52 | 1560.7528 | 3   | 5.885                                                          | 45.8% | 1 |
| 2 | <a href="#">SmEgg304.04266.04266.2</a> | 3.4568 | 0.239  | 99.8%  | 1560.34 | 1560.7528 | 1   | 6.225                                                          | 70.8% | 1 |
|   | <a href="#">SmEgg103.03218.03218.2</a> | 4.1479 | 0.2391 | 99.9%  | 1514.35 | 1514.7803 | 1   | 6.354                                                          | 71.4% | 1 |

Similarities: [TC20394|3|7-191](#)(2:1)

| U | TC23232 1 89-250                       | 2      | 3      | 14.2% | 162     | 17924     | 7.4 | homologue to UP GLO2_SCHMA (Q26547)<br>Probable hydroxyacylglutathione hydrolase<br>(Glyoxalase II) (Glx II) , complete |       |   |
|---|----------------------------------------|--------|--------|-------|---------|-----------|-----|-------------------------------------------------------------------------------------------------------------------------|-------|---|
|   | Filename                               | XCorr  | DeltCN | Conf% | ObsM+H+ | CalcM+H+  | SpR | ZScore                                                                                                                  | Ion%  | # |
| * | <a href="#">SmEgg203.03736.03736.2</a> | 3.4643 | 0.335  | 99.9% | 2293.53 | 2291.5408 | 1   | 6.433                                                                                                                   | 45.2% | 1 |
| * | <a href="#">SmEgg305.03545.03545.2</a> | 3.1538 | 0.3385 | 99.8% | 2231.48 | 2232.5164 | 1   | 6.383                                                                                                                   | 37.5% | 2 |

| U | TC23689 1 31-416                       | 3      | 5      | 13.7%  | 386     | 42424     | 5.4 | homologue to UP Q5DCT4_SCHJA (Q5DCT4)<br>SJCHGC02556 protein, partial (90%) |       |   |
|---|----------------------------------------|--------|--------|--------|---------|-----------|-----|-----------------------------------------------------------------------------|-------|---|
|   | Filename                               | XCorr  | DeltCN | Conf%  | ObsM+H+ | CalcM+H+  | SpR | ZScore                                                                      | Ion%  | # |
| * | <a href="#">SmEgg303.00112.00112.2</a> | 3.2754 | 0.2694 | 99.8%  | 2528.71 | 2529.908  | 1   | 5.523                                                                       | 39.1% | 1 |
| * | <a href="#">SmEgg103.00087.00087.2</a> | 4.0446 | 0.4273 | 100.0% | 3109.66 | 3110.5186 | 1   | 7.951                                                                       | 30.4% | 1 |

|   |                                        |              |               |                       |                |                 |            |                                                                                                                                         |             |          |
|---|----------------------------------------|--------------|---------------|-----------------------|----------------|-----------------|------------|-----------------------------------------------------------------------------------------------------------------------------------------|-------------|----------|
| * | <a href="#">SmEgg103.00091.00091.3</a> | 4.2949       | 0.2718        | 100.0%                | 3110.95        | 3110.5186       | 1          | 5.715                                                                                                                                   | 25.9%       | :        |
| U | <b>TC20784 3 18-455</b>                | 3            | 3             | <a href="#">13.5%</a> | 438            | 48895           | 6.7        | UP HXK_SCHMA (Q26609) Hexokinase , complete                                                                                             |             |          |
|   | <b>Filename</b>                        | <b>XCorr</b> | <b>DeltCN</b> | <b>Conf%</b>          | <b>ObsM+H+</b> | <b>CalcM+H+</b> | <b>SpR</b> | <b>ZScore</b>                                                                                                                           | <b>Ion%</b> | <b>#</b> |
| * | <a href="#">SmEgg103.04027.04027.2</a> | 4.509        | 0.3308        | 100.0%                | 1830.14        | 1830.0625       | 1          | 6.794                                                                                                                                   | 56.7%       | :        |
| * | <a href="#">SmEgg202.03516.03516.2</a> | 4.3259       | 0.2867        | 99.9%                 | 2330.21        | 2330.5132       | 1          | 6.609                                                                                                                                   | 52.4%       | :        |
|   | <a href="#">SmEgg102.03162.03162.2</a> | 3.1863       | 0.2563        | 99.8%                 | 2219.79        | 2220.4138       | 1          | 4.949                                                                                                                                   | 45.0%       | :        |
| U | <b>TC20381 3 19-545</b>                | 4            | 7             | <a href="#">13.3%</a> | 527            | 58674           | 7.0        | similar to UP Q6AZM9_XENLA (Q6AZM9) Eft-2-prov protein, partial (67%)                                                                   |             |          |
|   | <b>Filename</b>                        | <b>XCorr</b> | <b>DeltCN</b> | <b>Conf%</b>          | <b>ObsM+H+</b> | <b>CalcM+H+</b> | <b>SpR</b> | <b>ZScore</b>                                                                                                                           | <b>Ion%</b> | <b>#</b> |
| * | <a href="#">SmEgg105.03306.03306.2</a> | 3.726        | 0.35          | 100.0%                | 1427.02        | 1427.686        | 1          | 6.222                                                                                                                                   | 81.8%       | :        |
| * | <a href="#">SmEgg205.02299.02299.2</a> | 3.2823       | 0.2499        | 99.7%                 | 1951.66        | 1952.2145       | 1          | 5.797                                                                                                                                   | 53.1%       | :        |
|   | <a href="#">SmEgg202.03780.03780.2</a> | 4.1216       | 0.374         | 100.0%                | 2720.62        | 2721.9966       | 1          | 7.866                                                                                                                                   | 45.8%       | :        |
|   | <a href="#">SmEgg304.03922.03922.2</a> | 3.7092       | 0.2924        | 99.9%                 | 1753.7         | 1753.9996       | 1          | 5.475                                                                                                                                   | 63.3%       | :        |
| U | <b>TC20006 1 1-337</b>                 | 4            | 8             | <a href="#">13.1%</a> | 337            | 38323           | 6.9        | similar to UP Q5D8M2_SCHJA (Q5D8M2) SJCHGC06661 protein, complete                                                                       |             |          |
|   | <b>Filename</b>                        | <b>XCorr</b> | <b>DeltCN</b> | <b>Conf%</b>          | <b>ObsM+H+</b> | <b>CalcM+H+</b> | <b>SpR</b> | <b>ZScore</b>                                                                                                                           | <b>Ion%</b> | <b>#</b> |
|   | <a href="#">SmEgg202.03755.03755.2</a> | 3.4607       | 0.1593        | 99.5%                 | 3109.59        | 3110.3235       | 1          | 4.92                                                                                                                                    | 40.0%       | 3        |
| * | <a href="#">SmEgg104.01084.01084.1</a> | 2.0436       | 0.1918        | 97.0%                 | 773.33         | 773.8668        | 1          | 5.012                                                                                                                                   | 75.0%       | 2        |
|   | <a href="#">SmEgg205.02103.02103.1</a> | 2.7994       | 0.1669        | 99.0%                 | 1193.53        | 1194.3329       | 8          | 3.844                                                                                                                                   | 60.0%       | 1        |
|   | <a href="#">SmEgg105.01991.01991.2</a> | 3.6738       | 0.2827        | 99.9%                 | 1194.39        | 1194.3329       | 1          | 5.779                                                                                                                                   | 85.0%       | 2        |
| U | <b>TC22969 2 1-496</b>                 | 4            | 10            | <a href="#">12.9%</a> | 496            | 55559           | 5.4        | similar to UP VATB_MANSE (P31401) Vacuolar ATP synthase subunit B (V-ATPase B subunit) (Vacuolar proton pump B subunit) , partial (97%) |             |          |
|   | <b>Filename</b>                        | <b>XCorr</b> | <b>DeltCN</b> | <b>Conf%</b>          | <b>ObsM+H+</b> | <b>CalcM+H+</b> | <b>SpR</b> | <b>ZScore</b>                                                                                                                           | <b>Ion%</b> | <b>#</b> |
| * | <a href="#">SmEgg106.02713.02713.2</a> | 4.4609       | 0.4298        | 100.0%                | 2195.7         | 2196.4773       | 1          | 7.809                                                                                                                                   | 65.8%       | :        |
|   | <a href="#">SmEgg303.03804.03804.2</a> | 3.2567       | 0.1937        | 99.5%                 | 2465.38        | 2465.8237       | 6          | 4.953                                                                                                                                   | 33.3%       | :        |
|   | <a href="#">SmEgg304.04444.04444.2</a> | 3.6429       | 0.2654        | 99.8%                 | 2236.84        | 2236.5671       | 1          | 6.134                                                                                                                                   | 50.0%       | :        |
|   | <a href="#">SmEgg203.04650.04650.2</a> | 4.0481       | 0.3155        | 99.9%                 | 2336.97        | 2337.672        | 2          | 5.533                                                                                                                                   | 45.0%       | :        |
| U | <b>TC19825 3 27-193</b>                | 2            | 3             | <a href="#">12.6%</a> | 167            | 18619           | 5.1        | similar to UP Q5DA65_SCHJA (Q5DA65) SJCHGC06584 protein, partial (87%)                                                                  |             |          |
|   | <b>Filename</b>                        | <b>XCorr</b> | <b>DeltCN</b> | <b>Conf%</b>          | <b>ObsM+H+</b> | <b>CalcM+H+</b> | <b>SpR</b> | <b>ZScore</b>                                                                                                                           | <b>Ion%</b> | <b>#</b> |
| * | <a href="#">SmEgg203.03023.03023.2</a> | 4.2081       | 0.1386        | 99.8%                 | 1572.44        | 1572.7557       | 1          | 5.089                                                                                                                                   | 75.0%       | :        |
| * | <a href="#">SmEgg104.01628.01628.2</a> | 3.1098       | 0.0416        | 98.6%                 | 906.39         | 906.0672        | 5          | 3.014                                                                                                                                   | 100.0%      | :        |
| U | <b>TC29121 1 1-348</b>                 | 2            | 2             | <a href="#">12.4%</a> | 348            | 38930           | 9.3        | homologue to UP Q5DF67_SCHJA (Q5DF67) SJCHGC06021 protein, complete                                                                     |             |          |
|   | <b>Filename</b>                        | <b>XCorr</b> | <b>DeltCN</b> | <b>Conf%</b>          | <b>ObsM+H+</b> | <b>CalcM+H+</b> | <b>SpR</b> | <b>ZScore</b>                                                                                                                           | <b>Ion%</b> | <b>#</b> |
| * | <a href="#">SmEgg203.04407.04407.2</a> | 4.4261       | 0.5047        | 100.0%                | 1946.56        | 1946.1407       | 1          | 9.715                                                                                                                                   | 67.6%       | :        |
| * | <a href="#">SmEgg202.04671.04671.2</a> | 2.7971       | 0.2592        | 99.1%                 | 2698.24        | 2698.9226       | 1          | 4.809                                                                                                                                   | 37.5%       | :        |
| U | <b>TC21804 1 42-300</b>                | 2            | 4             | <a href="#">12.4%</a> | 259            | 28742           | 7.7        | homologue to UP Q26546_SCHMA (Q26546) Carbonyl reductase-like protein trans-spliced, partial (90%)                                      |             |          |
| U | <b>TC23878 3 14-321</b>                | 2            | 4             | <a href="#">10.4%</a> | 308            | 33755           | 7.8        | homologue to UP Q26546_SCHMA (Q26546) Carbonyl reductase-like protein trans-spliced, partial (93%)                                      |             |          |
|   | <b>Filename</b>                        | <b>XCorr</b> | <b>DeltCN</b> | <b>Conf%</b>          | <b>ObsM+H+</b> | <b>CalcM+H+</b> | <b>SpR</b> | <b>ZScore</b>                                                                                                                           | <b>Ion%</b> | <b>#</b> |
|   | <a href="#">SmEgg104.02000.02000.2</a> | 3.7273       | 0.1203        | 99.8%                 | 1474.57        | 1474.573        | 1          | 4.359                                                                                                                                   | 77.3%       | 2        |
|   | <a href="#">SmEgg102.03449.03449.2</a> | 3.9933       | 0.4136        | 100.0%                | 2067.76        | 2068.2878       | 1          | 7.349                                                                                                                                   | 47.4%       | 2        |

|                   |                                        |              |               |                       |                |                 |            |                                                                                                                          |             |          |
|-------------------|----------------------------------------|--------------|---------------|-----------------------|----------------|-----------------|------------|--------------------------------------------------------------------------------------------------------------------------|-------------|----------|
| <a href="#">U</a> | <b>TC20884 3 1-269</b>                 | 2            | 3             | <a href="#">12.3%</a> | 269            | 31005           | 9.6        | UPIQ1WIQ2_SCHMA (Q1WIQ2) Venom allergen-like protein 5, complete                                                         |             |          |
|                   | <b>Filename</b>                        | <b>XCorr</b> | <b>DeltCN</b> | <b>Conf%</b>          | <b>ObsM+H+</b> | <b>CalcM+H+</b> | <b>SpR</b> | <b>ZScore</b>                                                                                                            | <b>Ion%</b> | <b>#</b> |
| *                 | <a href="#">SmEgg102.02771.02771.2</a> | 4.6065       | 0.2979        | 100.0%                | 2046.57        | 2046.2251       | 1          | 6.152                                                                                                                    | 61.8%       | 1        |
| *                 | <a href="#">SmEgg105.02379.02379.2</a> | 3.3604       | 0.4154        | 99.9%                 | 1607.56        | 1607.7388       | 1          | 6.968                                                                                                                    | 60.7%       | 1        |
| <a href="#">U</a> | <b>TC19870 2 18-346</b>                | 2            | 3             | <a href="#">12.2%</a> | 329            | 36944           | 6.1        | UPIQ95PM1_SCHMA (Q95PM1) Cathepsin B endopeptidase precursor, complete                                                   |             |          |
|                   | <b>Filename</b>                        | <b>XCorr</b> | <b>DeltCN</b> | <b>Conf%</b>          | <b>ObsM+H+</b> | <b>CalcM+H+</b> | <b>SpR</b> | <b>ZScore</b>                                                                                                            | <b>Ion%</b> | <b>#</b> |
| *                 | <a href="#">SmEgg205.03703.03703.2</a> | 3.2531       | 0.1039        | 97.5%                 | 1654.76        | 1654.9832       | 5          | 3.729                                                                                                                    | 57.7%       | 1        |
| *                 | <a href="#">SmEgg204.04740.04740.2</a> | 3.3966       | 0.2462        | 99.8%                 | 3065.18        | 3065.3276       | 1          | 5.319                                                                                                                    | 36.0%       | 2        |
| <a href="#">U</a> | <b>TC19826 2 1-254</b>                 | 2            | 3             | <a href="#">12.2%</a> | 254            | 27799           | 6.3        | UPIO18501_SCHMA (O18501) Lysophospholipase homolog, complete                                                             |             |          |
|                   | <b>Filename</b>                        | <b>XCorr</b> | <b>DeltCN</b> | <b>Conf%</b>          | <b>ObsM+H+</b> | <b>CalcM+H+</b> | <b>SpR</b> | <b>ZScore</b>                                                                                                            | <b>Ion%</b> | <b>#</b> |
| *                 | <a href="#">SmEgg205.02471.02471.2</a> | 2.9633       | 0.2646        | 99.8%                 | 997.3          | 997.22595       | 1          | 5.505                                                                                                                    | 88.9%       | 1        |
|                   | <a href="#">SmEgg103.03653.03653.2</a> | 3.3427       | 0.2976        | 99.8%                 | 2427.74        | 2425.7273       | 1          | 6.082                                                                                                                    | 40.0%       | 2        |
| <a href="#">U</a> | <b>TC32695 2 1-354</b>                 | 2            | 2             | <a href="#">11.9%</a> | 354            | 40962           | 4.7        | similar to UP Q86FI4_SCHJA (Q86FI4) Clone ZD971 mRNA sequence, partial (94%)                                             |             |          |
|                   | <b>Filename</b>                        | <b>XCorr</b> | <b>DeltCN</b> | <b>Conf%</b>          | <b>ObsM+H+</b> | <b>CalcM+H+</b> | <b>SpR</b> | <b>ZScore</b>                                                                                                            | <b>Ion%</b> | <b>#</b> |
| *                 | <a href="#">SmEgg103.04342.04342.2</a> | 3.6466       | 0.0433        | 97.0%                 | 2164.14        | 2163.435        | 59         | 3.108                                                                                                                    | 36.8%       | 1        |
| *                 | <a href="#">SmEgg202.04192.04192.2</a> | 4.1971       | 0.3975        | 100.0%                | 2485.8         | 2484.6812       | 1          | 8.017                                                                                                                    | 42.9%       | 1        |
| <a href="#">U</a> | <b>TC29999 1 61-444</b>                | 2            | 4             | <a href="#">11.7%</a> | 384            | 43974           | 8.8        | homologue to UP Q5BY06_SCHJA (Q5BY06) SJCHGC00991 protein (Fragment), partial (97%)                                      |             |          |
|                   | <b>Filename</b>                        | <b>XCorr</b> | <b>DeltCN</b> | <b>Conf%</b>          | <b>ObsM+H+</b> | <b>CalcM+H+</b> | <b>SpR</b> | <b>ZScore</b>                                                                                                            | <b>Ion%</b> | <b>#</b> |
| *                 | <a href="#">SmEgg105.04185.04185.2</a> | 3.7822       | 0.2512        | 99.8%                 | 2263.21        | 2262.6536       | 1          | 5.927                                                                                                                    | 52.6%       | 1        |
| *                 | <a href="#">SmEgg102.03173.03173.2</a> | 5.9554       | 0.5471        | 100.0%                | 2510.93        | 2511.7632       | 1          | 9.979                                                                                                                    | 56.2%       | 1        |
| <a href="#">U</a> | <b>TC21991 1 1-507</b>                 | 4            | 6             | <a href="#">11.6%</a> | 507            | 53995           | 6.6        | similar to UP Q803L1_BRARE (Q803L1) Dihydrolipoamide dehydrogenase, partial (85%)                                        |             |          |
|                   | <b>Filename</b>                        | <b>XCorr</b> | <b>DeltCN</b> | <b>Conf%</b>          | <b>ObsM+H+</b> | <b>CalcM+H+</b> | <b>SpR</b> | <b>ZScore</b>                                                                                                            | <b>Ion%</b> | <b>#</b> |
| *                 | <a href="#">SmEgg105.02691.02691.2</a> | 4.9464       | 0.48          | 100.0%                | 1816.9         | 1818.1234       | 1          | 8.415                                                                                                                    | 72.2%       | 1        |
|                   | <a href="#">SmEgg103.02399.02399.2</a> | 3.4959       | 0.245         | 99.8%                 | 1820.16        | 1820.9697       | 11         | 5.776                                                                                                                    | 46.9%       | 1        |
| *                 | <a href="#">SmEgg206.02407.02407.2</a> | 4.3997       | 0.2204        | 99.9%                 | 1604.55        | 1604.8467       | 1          | 5.857                                                                                                                    | 67.9%       | 1        |
| *                 | <a href="#">SmEgg302.01155.01155.1</a> | 1.8434       | 0.2268        | 96.7%                 | 919.64         | 919.9763        | 248        | 4.414                                                                                                                    | 57.1%       | 1        |
| <a href="#">U</a> | <b>TC22485 3 1-328</b>                 | 2            | 3             | <a href="#">11.6%</a> | 328            | 36507           | 8.3        | homologue to UP Q5DAM7_SCHJA (Q5DAM7) SJCHGC06305 protein, partial (59%)                                                 |             |          |
|                   | <b>Filename</b>                        | <b>XCorr</b> | <b>DeltCN</b> | <b>Conf%</b>          | <b>ObsM+H+</b> | <b>CalcM+H+</b> | <b>SpR</b> | <b>ZScore</b>                                                                                                            | <b>Ion%</b> | <b>#</b> |
| *                 | <a href="#">SmEgg202.03641.03641.2</a> | 4.748        | 0.3783        | 100.0%                | 2511.1         | 2511.6833       | 1          | 6.95                                                                                                                     | 43.8%       | 1        |
| *                 | <a href="#">SmEgg205.02787.02787.2</a> | 2.5915       | 0.2097        | 97.0%                 | 1545.51        | 1545.7968       | 1          | 4.468                                                                                                                    | 62.5%       | 1        |
| <a href="#">U</a> | <b>TC19941 3 59-820</b>                | 4            | 7             | <a href="#">11.4%</a> | 762            | 87449           | 5.5        | UP CAN_SCHMA (P27730) Calpain (Calcium-activated neutral proteinase) (CANP), complete                                    |             |          |
| <a href="#">U</a> | <b>TC20240 2 46-808</b>                | 4            | 7             | <a href="#">11.4%</a> | 763            | 87563           | 5.4        | GB AAA29858.1 160937 SCMCANPA calcium-activated neutral proteinase {Schistosoma mansoni} (exp=-1; wgp=0; cg=0), complete |             |          |
|                   | <b>Filename</b>                        | <b>XCorr</b> | <b>DeltCN</b> | <b>Conf%</b>          | <b>ObsM+H+</b> | <b>CalcM+H+</b> | <b>SpR</b> | <b>ZScore</b>                                                                                                            | <b>Ion%</b> | <b>#</b> |
|                   | <a href="#">SmEgg203.04738.04738.2</a> | 4.1671       | 0.4192        | 100.0%                | 2754.04        | 2755.1174       | 1          | 8.153                                                                                                                    | 43.8%       | 2        |
|                   | <a href="#">SmEgg202.04645.04645.3</a> | 3.603        | 0.3027        | 99.4%                 | 4689.51        | 4688.9595       | 1          | 5.68                                                                                                                     | 18.1%       | 1        |
|                   | <a href="#">SmEgg202.04633.04633.3</a> | 4.5372       | 0.4804        | 100.0%                | 4498.32        | 4500.7764       | 1          | 8.749                                                                                                                    | 22.4%       | 2        |
|                   | <a href="#">SmEgg103.03598.03598.2</a> | 4.023        | 0.2551        | 99.9%                 | 2362.73        | 2363.6323       | 3          | 5.011                                                                                                                    | 40.0%       | 2        |

|                                                      |                                        |              |               |                       |                |                 |            |                                                                                     |             |          |  |
|------------------------------------------------------|----------------------------------------|--------------|---------------|-----------------------|----------------|-----------------|------------|-------------------------------------------------------------------------------------|-------------|----------|--|
| <a href="#">U</a>                                    | <b>TC20762 2 12-413</b>                | 3            | 4             | <a href="#">11.2%</a> | 402            | 45640           | 6.2        | homologue to UP Q26606_SCHMA (Q26606)<br>Serpin (Fragment), complete                |             |          |  |
|                                                      | <b>Filename</b>                        | <b>XCorr</b> | <b>DeltCN</b> | <b>Conf%</b>          | <b>ObsM+H+</b> | <b>CalcM+H+</b> | <b>SpR</b> | <b>ZScore</b>                                                                       | <b>Ion%</b> | <b>#</b> |  |
| *                                                    | <a href="#">SmEgg303.00224.00224.2</a> | 3.2607       | 0.3313        | 99.8%                 | 2072.55        | 2072.3313       | 1          | 6.707                                                                               | 44.1%       | 1        |  |
| *                                                    | <a href="#">SmEgg103.03038.03038.2</a> | 3.5784       | 0.3171        | 99.9%                 | 1683.57        | 1683.8169       | 1          | 5.862                                                                               | 66.7%       | 2        |  |
| *                                                    | <a href="#">SmEgg104.03838.03838.2</a> | 3.8003       | 0.2304        | 99.8%                 | 1535.74        | 1534.7705       | 1          | 6.3                                                                                 | 73.1%       | 1        |  |
| <a href="#">U</a>                                    | <b>TC27190 3 11-263</b>                | 2            | 6             | <a href="#">11.1%</a> | 253            | 29142           | 7.4        | similar to UP Q86F28_SCHJA (Q86F28) Clone<br>ZZD1164 mRNA sequence, partial (97%)   |             |          |  |
|                                                      | <b>Filename</b>                        | <b>XCorr</b> | <b>DeltCN</b> | <b>Conf%</b>          | <b>ObsM+H+</b> | <b>CalcM+H+</b> | <b>SpR</b> | <b>ZScore</b>                                                                       | <b>Ion%</b> | <b>#</b> |  |
|                                                      | <a href="#">SmEgg102.03732.03732.2</a> | 4.0936       | 0.3477        | 100.0%                | 1485.82        | 1485.6335       | 1          | 6.616                                                                               | 81.8%       | 1        |  |
| *                                                    | <a href="#">SmEgg104.04225.04225.2</a> | 4.5937       | 0.2001        | 99.9%                 | 1972.6         | 1973.304        | 1          | 5.161                                                                               | 66.7%       | 1        |  |
| <a href="#">U</a>                                    | <b>TC27701 2 1-230</b>                 | 2            | 3             | <a href="#">10.9%</a> | 230            | 26843           | 9.4        | no description                                                                      |             |          |  |
|                                                      | <b>Filename</b>                        | <b>XCorr</b> | <b>DeltCN</b> | <b>Conf%</b>          | <b>ObsM+H+</b> | <b>CalcM+H+</b> | <b>SpR</b> | <b>ZScore</b>                                                                       | <b>Ion%</b> | <b>#</b> |  |
| 2                                                    | <a href="#">SmEgg204.01221.01221.2</a> | 2.668        | 0.2184        | 99.1%                 | 1151.42        | 1151.2241       | 3          | 4.847                                                                               | 72.2%       | 1        |  |
| *                                                    | <a href="#">SmEgg205.02553.02553.2</a> | 3.5245       | 0.1704        | 99.7%                 | 1800.56        | 1800.9683       | 1          | 4.624                                                                               | 60.7%       | 2        |  |
| Similarities: <a href="#">CD098447 3 20-99</a> (1:1) |                                        |              |               |                       |                |                 |            |                                                                                     |             |          |  |
| <a href="#">U</a>                                    | <b>TC33572 1 1-147</b>                 | 2            | 4             | <a href="#">10.9%</a> | 147            | 15977           | 9.7        | homologue to UP Q5DF72_SCHJA (Q5DF72)<br>SJCHGC03550 protein, complete              |             |          |  |
|                                                      | <b>Filename</b>                        | <b>XCorr</b> | <b>DeltCN</b> | <b>Conf%</b>          | <b>ObsM+H+</b> | <b>CalcM+H+</b> | <b>SpR</b> | <b>ZScore</b>                                                                       | <b>Ion%</b> | <b>#</b> |  |
|                                                      | <a href="#">SmEgg303.02211.02211.2</a> | 3.5367       | 0.3077        | 99.8%                 | 1567.44        | 1567.7416       | 2          | 6.688                                                                               | 71.4%       | 2        |  |
|                                                      | <a href="#">SmEgg303.02256.02256.2</a> | 3.1466       | 0.3469        | 99.8%                 | 1638.14        | 1638.8204       | 14         | 6.256                                                                               | 53.3%       | 2        |  |
| <a href="#">U</a>                                    | <b>TC20976 2 14-351</b>                | 2            | 3             | <a href="#">10.7%</a> | 338            | 37769           | 5.9        | similar to UP Q5D9E1_SCHJA (Q5D9E1)<br>SJCHGC06074 protein, partial (97%)           |             |          |  |
|                                                      | <b>Filename</b>                        | <b>XCorr</b> | <b>DeltCN</b> | <b>Conf%</b>          | <b>ObsM+H+</b> | <b>CalcM+H+</b> | <b>SpR</b> | <b>ZScore</b>                                                                       | <b>Ion%</b> | <b>#</b> |  |
| *                                                    | <a href="#">SmEgg202.03751.03751.2</a> | 3.5516       | 0.3054        | 99.8%                 | 1795.55        | 1795.002        | 1          | 5.664                                                                               | 57.1%       | 1        |  |
| *                                                    | <a href="#">SmEgg204.04372.04372.2</a> | 4.2178       | 0.2545        | 99.9%                 | 2333.13        | 2331.707        | 1          | 6.586                                                                               | 50.0%       | 2        |  |
| <a href="#">U</a>                                    | <b>TC23712 2 9-611</b>                 | 5            | 17            | <a href="#">10.6%</a> | 603            | 67391           | 6.4        | UPI Q95VB7_SCHMA (Q95VB7) Albumin,<br>complete                                      |             |          |  |
|                                                      | <b>Filename</b>                        | <b>XCorr</b> | <b>DeltCN</b> | <b>Conf%</b>          | <b>ObsM+H+</b> | <b>CalcM+H+</b> | <b>SpR</b> | <b>ZScore</b>                                                                       | <b>Ion%</b> | <b>#</b> |  |
| *                                                    | <a href="#">SmEgg105.02359.02359.2</a> | 3.8139       | 0.3117        | 99.9%                 | 2262.72        | 2263.321        | 1          | 7.024                                                                               | 44.4%       | 1        |  |
|                                                      | <a href="#">SmEgg103.02941.02941.2</a> | 3.9472       | 0.3719        | 100.0%                | 1480.37        | 1480.7068       | 1          | 7.189                                                                               | 87.5%       | 1        |  |
| *                                                    | <a href="#">SmEgg304.02143.02143.2</a> | 3.7652       | 0.408         | 100.0%                | 1804.04        | 1805.038        | 1          | 7.214                                                                               | 53.1%       | 1        |  |
| *                                                    | <a href="#">SmEgg103.02158.02158.2</a> | 2.8197       | 0.2706        | 99.6%                 | 1440.45        | 1440.6395       | 1          | 4.793                                                                               | 61.5%       | 1        |  |
| *                                                    | <a href="#">SmEgg203.04391.04391.2</a> | 4.798        | 0.3565        | 100.0%                | 1663.44        | 1663.8773       | 1          | 7.859                                                                               | 76.9%       | 1        |  |
| <a href="#">U</a>                                    | <b>TC26067 2 18-354</b>                | 3            | 7             | <a href="#">10.4%</a> | 337            | 36476           | 7.7        | similar to UP Q7Z113_SCHJA (Q7Z113) Lactate<br>dehydrogenase-like protein, complete |             |          |  |
|                                                      | <b>Filename</b>                        | <b>XCorr</b> | <b>DeltCN</b> | <b>Conf%</b>          | <b>ObsM+H+</b> | <b>CalcM+H+</b> | <b>SpR</b> | <b>ZScore</b>                                                                       | <b>Ion%</b> | <b>#</b> |  |
|                                                      | <a href="#">SmEgg206.02458.02458.2</a> | 4.5081       | 0.2553        | 99.9%                 | 1958.69        | 1959.215        | 1          | 6.564                                                                               | 68.8%       | 2        |  |
|                                                      | <a href="#">SmEgg203.02799.02799.2</a> | 4.4115       | 0.3589        | 100.0%                | 1732.6         | 1731.9083       | 1          | 7.13                                                                                | 71.4%       | 2        |  |
|                                                      | <a href="#">SmEgg306.02894.02894.2</a> | 3.893        | 0.2243        | 99.8%                 | 2022.45        | 2023.3002       | 1          | 4.9                                                                                 | 55.9%       | 3        |  |
| <a href="#">U</a>                                    | <b>TC19994 3 39-475</b>                | 3            | 8             | <a href="#">10.3%</a> | 437            | 48727           | 5.6        | homologue to UP Q5D9C5_SCHJA (Q5D9C5)<br>SJCHGC09453 protein, partial (57%)         |             |          |  |
|                                                      | <b>Filename</b>                        | <b>XCorr</b> | <b>DeltCN</b> | <b>Conf%</b>          | <b>ObsM+H+</b> | <b>CalcM+H+</b> | <b>SpR</b> | <b>ZScore</b>                                                                       | <b>Ion%</b> | <b>#</b> |  |
|                                                      | <a href="#">SmEgg103.04597.04597.2</a> | 4.3602       | 0.3218        | 100.0%                | 1813.08        | 1812.1161       | 1          | 6.065                                                                               | 71.9%       | 1        |  |
|                                                      | <a href="#">SmEgg104.03999.03999.2</a> | 4.2184       | 0.3058        | 100.0%                | 1431.76        | 1431.7742       | 1          | 5.162                                                                               | 75.0%       | 1        |  |
| *                                                    | <a href="#">SmEgg304.03068.03068.2</a> | 3.0579       | 0.2519        | 99.7%                 | 1684.08        | 1683.9022       | 4          | 5.641                                                                               | 57.1%       | 1        |  |
| <a href="#">U</a>                                    | <b>TC20220 1 44-367</b>                | 2            | 8             | <a href="#">9.9%</a>  | 324            | 35763           | 6.9        | UP Q5QEI6_SCHMA (Q5QEI6) Glycerol<br>3-phosphate dehydrogenase, complete            |             |          |  |
|                                                      | <b>Filename</b>                        | <b>XCorr</b> | <b>DeltCN</b> | <b>Conf%</b>          | <b>ObsM+H+</b> | <b>CalcM+H+</b> | <b>SpR</b> | <b>ZScore</b>                                                                       | <b>Ion%</b> | <b>#</b> |  |

|                   |                                        |              |               |                      |                |                 |            |                                                                                                                                                                          |             |          |
|-------------------|----------------------------------------|--------------|---------------|----------------------|----------------|-----------------|------------|--------------------------------------------------------------------------------------------------------------------------------------------------------------------------|-------------|----------|
| *                 | <a href="#">SmEgg102.02063.02063.1</a> | 2.5857       | 0.2289        | 100.0%               | 1295.61        | 1296.4631       | 53         | 5.408                                                                                                                                                                    | 50.0%       |          |
|                   | <a href="#">SmEgg104.04270.04270.2</a> | 5.6983       | 0.4767        | 100.0%               | 1961.76        | 1962.2102       | 1          | 9.262                                                                                                                                                                    | 73.7%       |          |
| <a href="#">U</a> | <b>TC21605 3 17-259</b>                | 2            | 3             | <a href="#">9.1%</a> | 243            | 27843           | 5.7        | similar to UP Q5DHS3_SCHJA (Q5DHS3)<br>SJCHGC01739 protein, complete                                                                                                     |             |          |
|                   | <b>Filename</b>                        | <b>XCorr</b> | <b>DeltCN</b> | <b>Conf%</b>         | <b>ObsM+H+</b> | <b>CalcM+H+</b> | <b>SpR</b> | <b>ZScore</b>                                                                                                                                                            | <b>Ion%</b> | <b>#</b> |
| *                 | <a href="#">SmEgg104.01887.01887.2</a> | 4.2982       | 0.4182        | 100.0%               | 1826.66        | 1827.0012       | 1          | 7.414                                                                                                                                                                    | 56.2%       |          |
| *                 | <a href="#">SmEgg205.00092.00092.2</a> | 2.9774       | 0.1243        | 95.6%                | 2112.67        | 2113.3318       | 6          | 3.022                                                                                                                                                                    | 41.7%       |          |
| <a href="#">U</a> | <b>TC28706 2 11-462</b>                | 2            | 2             | <a href="#">8.4%</a> | 452            | 48971           | 8.5        | weakly similar to<br>GB AAA39311.1 309413 MUSIMPD IMP<br>dehydrogenase {Mus musculus} (exp=-1; wgp=0;<br>cg=0) , partial (83%)                                           |             |          |
|                   | <b>Filename</b>                        | <b>XCorr</b> | <b>DeltCN</b> | <b>Conf%</b>         | <b>ObsM+H+</b> | <b>CalcM+H+</b> | <b>SpR</b> | <b>ZScore</b>                                                                                                                                                            | <b>Ion%</b> | <b>#</b> |
| *                 | <a href="#">SmEgg306.02683.02683.2</a> | 3.7127       | 0.2558        | 99.8%                | 2054.26        | 2054.4375       | 1          | 6.145                                                                                                                                                                    | 58.8%       | 1        |
| *                 | <a href="#">SmEgg103.03549.03549.2</a> | 3.3267       | 0.2879        | 99.8%                | 2117.33        | 2118.404        | 1          | 5.834                                                                                                                                                                    | 47.4%       | 1        |
| <a href="#">U</a> | <b>TC19789 1 1-438</b>                 | 2            | 5             | <a href="#">8.0%</a> | 438            | 49246           | 6.2        | UPIQ7JQ21_SCHMA (Q7JQ21) Immunophilin,<br>complete                                                                                                                       |             |          |
|                   | <b>Filename</b>                        | <b>XCorr</b> | <b>DeltCN</b> | <b>Conf%</b>         | <b>ObsM+H+</b> | <b>CalcM+H+</b> | <b>SpR</b> | <b>ZScore</b>                                                                                                                                                            | <b>Ion%</b> | <b>#</b> |
| *                 | <a href="#">SmEgg202.03227.03227.2</a> | 4.0811       | 0.3573        | 100.0%               | 1842.71        | 1843.0497       | 1          | 6.416                                                                                                                                                                    | 56.7%       |          |
| *                 | <a href="#">SmEgg205.03242.03242.2</a> | 4.6506       | 0.3916        | 100.0%               | 2093.9         | 2093.4053       | 1          | 7.235                                                                                                                                                                    | 61.1%       |          |
| <a href="#">U</a> | <b>TC35767 1 14-211</b>                | 2            | 4             | <a href="#">7.6%</a> | 198            | 22997           | 9.5        | no description                                                                                                                                                           |             |          |
|                   | <b>Filename</b>                        | <b>XCorr</b> | <b>DeltCN</b> | <b>Conf%</b>         | <b>ObsM+H+</b> | <b>CalcM+H+</b> | <b>SpR</b> | <b>ZScore</b>                                                                                                                                                            | <b>Ion%</b> | <b>#</b> |
| *                 | <a href="#">SmEgg204.01754.01754.1</a> | 2.4429       | 0.3111        | 100.0%               | 1412.6         | 1413.5303       | 1          | 6.012                                                                                                                                                                    | 53.6%       |          |
| *                 | <a href="#">SmEgg204.01753.01753.2</a> | 3.7614       | 0.2273        | 99.8%                | 1413.05        | 1413.5303       | 1          | 6.286                                                                                                                                                                    | 60.7%       |          |
| <a href="#">U</a> | <b>TC24197 1 112-543</b>               | 2            | 7             | <a href="#">7.0%</a> | 532            | 58822           | 6.4        | similar to<br>RF NP_001012581.1 60302774 NM_001012563<br>chaperonin containing TCP1, subunit 5 (epsilon)<br>{Gallus gallus} (exp=-1; wgp=0; cg=0), partial<br>(95%)      |             |          |
|                   | <b>Filename</b>                        | <b>XCorr</b> | <b>DeltCN</b> | <b>Conf%</b>         | <b>ObsM+H+</b> | <b>CalcM+H+</b> | <b>SpR</b> | <b>ZScore</b>                                                                                                                                                            | <b>Ion%</b> | <b>#</b> |
|                   | <a href="#">SmEgg105.01523.01523.1</a> | 2.164        | 0.1516        | 95.4%                | 757.46         | 757.9262        | 24         | 3.849                                                                                                                                                                    | 75.0%       | 1        |
| *                 | <a href="#">SmEgg106.00294.00294.3</a> | 4.7295       | 0.3623        | 100.0%               | 3086.01        | 3086.377        | 1          | 6.547                                                                                                                                                                    | 27.6%       | 6        |
| <a href="#">U</a> | <b>TC30703 1 25-570</b>                | 2            | 6             | <a href="#">6.4%</a> | 546            | 59411           | 6.5        | weakly similar to<br>RF NP_001004389.1 52138673 NM_001004389<br>chaperonin containing TCP1, subunit 8 (theta)<br>{Gallus gallus} (exp=-1; wgp=0; cg=0), partial<br>(81%) |             |          |
|                   | <b>Filename</b>                        | <b>XCorr</b> | <b>DeltCN</b> | <b>Conf%</b>         | <b>ObsM+H+</b> | <b>CalcM+H+</b> | <b>SpR</b> | <b>ZScore</b>                                                                                                                                                            | <b>Ion%</b> | <b>#</b> |
| *                 | <a href="#">SmEgg102.03286.03286.2</a> | 3.7202       | 0.4334        | 100.0%               | 1794.07        | 1794.021        | 1          | 7.321                                                                                                                                                                    | 63.3%       |          |
| *                 | <a href="#">SmEgg303.04447.04447.2</a> | 3.7856       | 0.3044        | 99.9%                | 2153.91        | 2155.2979       | 1          | 7.078                                                                                                                                                                    | 52.8%       |          |
| <a href="#">U</a> | <b>TC22607 1 19-530</b>                | 2            | 2             | <a href="#">6.4%</a> | 512            | 54447           | 7.5        | homologue to UP Q5BZE7_SCHJA (Q5BZE7)<br>SJCHGC01962 protein (Fragment), partial (97%)                                                                                   |             |          |
|                   | <b>Filename</b>                        | <b>XCorr</b> | <b>DeltCN</b> | <b>Conf%</b>         | <b>ObsM+H+</b> | <b>CalcM+H+</b> | <b>SpR</b> | <b>ZScore</b>                                                                                                                                                            | <b>Ion%</b> | <b>#</b> |
|                   | <a href="#">SmEgg104.01940.01940.2</a> | 2.5687       | 0.2344        | 96.9%                | 1610.47        | 1610.8076       | 4          | 4.564                                                                                                                                                                    | 50.0%       | 1        |
|                   | <a href="#">SmEgg204.02182.02182.2</a> | 3.3125       | 0.3208        | 99.8%                | 2080.75        | 2081.3948       | 6          | 5.575                                                                                                                                                                    | 41.2%       | 1        |
| <a href="#">U</a> | <b>TC29754 1 53-634</b>                | 2            | 2             | <a href="#">6.0%</a> | 582            | 64535           | 6.8        | similar to UP Q5DBB3_SCHJA (Q5DBB3)<br>SJCHGC04686 protein, partial (37%)                                                                                                |             |          |
|                   | <b>Filename</b>                        | <b>XCorr</b> | <b>DeltCN</b> | <b>Conf%</b>         | <b>ObsM+H+</b> | <b>CalcM+H+</b> | <b>SpR</b> | <b>ZScore</b>                                                                                                                                                            | <b>Ion%</b> | <b>#</b> |
| *                 | <a href="#">SmEgg204.04401.04401.2</a> | 3.6601       | 0.28          | 99.8%                | 1716.87        | 1717.0183       | 1          | 5.954                                                                                                                                                                    | 64.3%       | 1        |
| *                 | <a href="#">SmEgg102.03369.03369.2</a> | 3.5181       | 0.341         | 99.9%                | 2158.31        | 2157.3826       | 1          | 6.172                                                                                                                                                                    | 42.1%       | 1        |

[U](#) **TC25000|3|19-625** 3 8 [5.1%](#) 607 68285 5.8 similar to UP|Q5D981\_SCHJA (Q5D981) SJCHGC01869 protein, partial (66%)

|   | Filename                               | XCorr  | DeltCN | Conf%  | ObsM+H+ | CalcM+H+  | SpR | ZScore | Ion%  | # |
|---|----------------------------------------|--------|--------|--------|---------|-----------|-----|--------|-------|---|
| * | <a href="#">SmEgg203.03042.03042.2</a> | 2.5803 | 0.2813 | 98.6%  | 1908.97 | 1909.0785 | 17  | 5.291  | 40.0% |   |
| * | <a href="#">SmEgg105.02886.02886.2</a> | 3.5121 | 0.3559 | 99.9%  | 1779.25 | 1779.963  | 1   | 6.563  | 57.1% |   |
| * | <a href="#">SmEgg203.03776.03776.2</a> | 4.394  | 0.4171 | 100.0% | 1785.32 | 1786.0094 | 1   | 7.712  | 64.3% |   |

[U](#) **TC22055|2|7-280** 2 2 [4.7%](#) 274 31394 5.1 no description

|   | Filename                               | XCorr  | DeltCN | Conf% | ObsM+H+ | CalcM+H+  | SpR | ZScore | Ion%  | # |
|---|----------------------------------------|--------|--------|-------|---------|-----------|-----|--------|-------|---|
| * | <a href="#">SmEgg404.00178.00178.2</a> | 2.8509 | 0.2101 | 99.5% | 1396.4  | 1397.6158 | 2   | 4.466  | 65.0% | 1 |
| * | <a href="#">SmEgg404.00056.00056.2</a> | 2.5668 | 0.1996 | 96.4% | 1525.26 | 1525.7466 | 9   | 3.777  | 58.3% | 1 |

[U](#) **TC31784|2|11-865** 2 4 [4.1%](#) 855 99343 5.3 UP|MYSP\_SCHMA (P06198) Paramyosin, complete

|   | Filename                               | XCorr  | DeltCN | Conf%  | ObsM+H+ | CalcM+H+  | SpR | ZScore | Ion%  | # |
|---|----------------------------------------|--------|--------|--------|---------|-----------|-----|--------|-------|---|
| * | <a href="#">SmEgg204.03646.03646.2</a> | 3.6354 | 0.3507 | 99.9%  | 1950.97 | 1951.1869 | 4   | 5.87   | 43.8% |   |
| * | <a href="#">SmEgg103.04093.04093.2</a> | 4.8713 | 0.4783 | 100.0% | 2075.67 | 2076.2651 | 1   | 8.182  | 58.8% |   |

[U](#) **TC24866|3|12-1074** 2 7 [4.0%](#) 1063 119211 6.1 similar to UP|Q86FX4\_SCHJA (Q86FX4) Ubiquitin-activating enzyme E (Fragment), complete

|   | Filename                               | XCorr  | DeltCN | Conf%  | ObsM+H+ | CalcM+H+  | SpR | ZScore | Ion%  | # |
|---|----------------------------------------|--------|--------|--------|---------|-----------|-----|--------|-------|---|
| * | <a href="#">SmEgg205.04079.04079.2</a> | 3.588  | 0.2691 | 99.8%  | 2647.88 | 2647.06   | 1   | 5.96   | 38.1% | 4 |
| * | <a href="#">SmEgg203.04503.04503.2</a> | 4.6014 | 0.3128 | 100.0% | 2355.93 | 2356.7234 | 1   | 7.087  | 55.0% |   |

[U](#) **TC22499|3|13-820** 3 4 [2.8%](#) 808 91946 5.2 UP|Q9NHY5\_SCHMA (Q9NHY5) Endoplasmin, complete

|  | Filename                               | XCorr  | DeltCN | Conf%  | ObsM+H+ | CalcM+H+  | SpR | ZScore | Ion%  | # |
|--|----------------------------------------|--------|--------|--------|---------|-----------|-----|--------|-------|---|
|  | <a href="#">SmEgg102.02114.02114.1</a> | 2.6038 | 0.2982 | 100.0% | 1275.56 | 1276.3861 | 4   | 6.098  | 59.1% | 2 |
|  | <a href="#">SmEgg302.04391.04391.1</a> | 2.1195 | 0.244  | 99.3%  | 1413.49 | 1414.6464 | 8   | 5.5    | 55.0% | 1 |
|  | <a href="#">SmEgg302.04387.04387.2</a> | 4.0212 | 0.336  | 100.0% | 1414.41 | 1414.6464 | 1   | 5.586  | 80.0% | 1 |

Similarities: [CD188921|6|11-131\(1:2\)](#)

|                 | Proteins | Peptide IDs | Spectra |
|-----------------|----------|-------------|---------|
| Unfiltered      | 63945    | 85619       | 143338  |
| Filtered        | 208      | 1366        | 3630    |
| Forward matches | 208      | 1366        | 3630    |
| Decoy matches   | 0        | 0           | 0       |
| Forward FP rate | 0.0%     | 0.0%        | 0.0%    |

/data/6/jrjohns1/s\_mansoni/SmEgg
